# Supplementary material
Source: publisher site journal article supplement (https://www.spandidos-publications.com/4227/downloadSupplementary)
Supplement: Supplementary file 1 [file downloadSupplementary]

## Sheet: EMT-DGC
Table SI. CNA-EMT genes in DGC.
Cancer type	EMT-Gene	Number of patients with alterations	% of occurrence (n= 7)	Chromosome	Gene cytoband	CNA-type	EMT-Gene description	p-value (DGC vs NAG)	ID Patients
DGC	GPC3	7	100	X	q26.2	Gain|Loss	glypican 3	0.355918	DGC-1CG-001|DGC-3CG-035|DGC-3CG-042|DGC-3CG-047|DGC-3CG-064|DGC-3CG-173|DGC-8CG-004
DGC	FLNA	6	85.7	X	q28	Gain	filamin A	0.00096454	DGC-1CG-001|DGC-3CG-035|DGC-3CG-042|DGC-3CG-047|DGC-3CG-064|DGC-3CG-173
DGC	NDRG1	6	85.7	8	q24.22	Gain	N-myc downstream regulated 1	0.00096454	DGC-3CG-173|DGC-1CG-001|DGC-3CG-035|DGC-3CG-042|DGC-3CG-047|DGC-8CG-004
DGC	PROX1	6	85.7	1	q32.3	Gain	prospero homeobox 1	0.00096454	DGC-1CG-001|DGC-3CG-035|DGC-3CG-042|DGC-3CG-047|DGC-3CG-173|DGC-8CG-004
DGC	ALK	5	71.4	2	p23.1	Gain	ALK receptor tyrosine kinase	0.00823735	DGC-1CG-001|DGC-3CG-035|DGC-3CG-042|DGC-3CG-173|DGC-3CG-047
DGC	DDR2	5	71.4	1	q23.3	Gain	discoidin domain receptor tyrosine kinase 2 member 2|discoidin domain-containing receptor 2|discoidin domain-containing receptor tyrosine kinase 2|hydroxyaryl-protein kinase|migration-inducing gene 16 protein|neurotrophic tyrosine kinase receptor related 3|neurotrophic tyrosine kinase receptor-related 3|receptor protein-tyrosine kinase TKT|tyrosine-protein kinase TYRO10|tyrosylprotein kinase	0.00823735	DGC-1CG-001|DGC-3CG-035|DGC-3CG-047|DGC-3CG-173|DGC-8CG-004
DGC	IGF1R	5	71.4	15	q26.3	Gain	insulin like growth factor 1 receptor	0.00823735	DGC-3CG-035|DGC-3CG-042|DGC-3CG-047|DGC-3CG-064|DGC-3CG-173
DGC	IGSF8	5	71.4	1	q23.2	Gain	immunoglobulin superfamily member 8	0.00823735	DGC-3CG-173|DGC-1CG-001|DGC-3CG-035|DGC-3CG-047|DGC-8CG-004
DGC	JAG1	5	71.4	20	p12.2	Gain	jagged 1	0.00823735	DGC-3CG-173|DGC-3CG-035|DGC-3CG-064|DGC-8CG-004|DGC-3CG-047
DGC	MIR205	5	71.4	1	q32.2	Gain	microRNA 205	0.00823735	DGC-1CG-001|DGC-3CG-035|DGC-3CG-047|DGC-3CG-173|DGC-8CG-004
DGC	PTP4A3	5	71.4	8	q24.3	Gain	protein tyrosine phosphatase type IVA member 3	0.00823735	DGC-3CG-035|DGC-3CG-042|DGC-3CG-047|DGC-3CG-173|DGC-8CG-004
DGC	THBD	5	71.4	20	p11.21	Gain	thrombomodulin	0.00823735	DGC-3CG-035|DGC-3CG-042|DGC-8CG-004|DGC-3CG-047|DGC-3CG-173
DGC	TRPS1	5	71.4	8	q23.3	Gain	transcriptional repressor GATA binding 1	0.00823735	DGC-3CG-035|DGC-3CG-042|DGC-3CG-047|DGC-8CG-004|DGC-3CG-173
DGC	AR	4	57.1	X	q12	Gain	androgen receptor	0.317021	DGC-1CG-001|DGC-3CG-047|DGC-3CG-173|DGC-8CG-004
DGC	BMP2	4	57.1	20	p12.3	Gain	bone morphogenetic protein 2	0.0300198	DGC-3CG-047|DGC-3CG-064|DGC-3CG-173|DGC-8CG-004
DGC	CYP7B1	4	57.1	8	q12.3	Gain	cytochrome P450 family 7 subfamily B member 1	0.0300198	DGC-3CG-035|DGC-3CG-047|DGC-8CG-004|DGC-3CG-173
DGC	EGFR	4	57.1	7	p11.2	Gain	epidermal growth factor receptor	0.0300198	DGC-3CG-035|DGC-3CG-042|DGC-3CG-047|DGC-3CG-173
DGC	EP300	4	57.1	22	q13.2	Loss	E1A binding protein p300	0.0300198	DGC-3CG-047|DGC-3CG-035|DGC-3CG-042|DGC-3CG-173
DGC	ETS1	4	57.1	11	q24.3	Gain	ETS proto-oncogene 1 transcription factor	0.0300198	DGC-3CG-035|DGC-3CG-042|DGC-3CG-047|DGC-8CG-004
DGC	FMR1	4	57.1	X	q27.3	Gain	fragile X mental retardation 1	0.626117	DGC-1CG-001|DGC-3CG-035|DGC-3CG-064|DGC-3CG-173
DGC	FOXA2	4	57.1	20	p11.21	Gain	forkhead box A2	0.0300198	DGC-3CG-042|DGC-3CG-064|DGC-3CG-047|DGC-3CG-173
DGC	H19	4	57.1	11	p15.5	Gain	H19 imprinted maternally expressed transcript (non-protein coding)	0.0300198	DGC-3CG-035|DGC-3CG-042|DGC-3CG-047|DGC-8CG-004
DGC	KLF6	4	57.1	10	p15.2	Gain	Kruppel like factor 6	0.0300198	DGC-3CG-035|DGC-3CG-047|DGC-3CG-064|DGC-3CG-173
DGC	LINC00261	4	57.1	20	p11.21	Gain	long intergenic non-protein coding RNA 261	0.0300198	DGC-3CG-042|DGC-3CG-064|DGC-3CG-047|DGC-3CG-173
DGC	MIR181A1	4	57.1	1	q32.1	Gain	microRNA 181a-1	0.0300198	DGC-1CG-001|DGC-3CG-035|DGC-3CG-047|DGC-8CG-004
DGC	MIR181B1	4	57.1	1	q32.1	Gain	microRNA 181b-1	0.0300198	DGC-1CG-001|DGC-3CG-035|DGC-3CG-047|DGC-8CG-004
DGC	MIR675	4	57.1	11	p15.5	Gain	microRNA 675	0.0300198	DGC-3CG-035|DGC-3CG-042|DGC-3CG-047|DGC-8CG-004
DGC	MIR92B	4	57.1	1	q22	Gain	microRNA 92b	0.0300198	DGC-3CG-035|DGC-3CG-047|DGC-3CG-173|DGC-8CG-004
DGC	MUC1	4	57.1	1	q22	Gain	mucin 1 cell surface associated transmembrane|mucin-1|peanut-reactive urinary mucin|polymorphic epithelial mucin|tumor associated epithelial mucin|tumor-associated epithelial membrane antigen|tumor-associated mucin	0.0300198	DGC-3CG-035|DGC-3CG-047|DGC-3CG-173|DGC-8CG-004
DGC	NTRK2	4	57.1	9	q21.33	Gain	neurotrophic receptor tyrosine kinase 2	0.0300198	DGC-3CG-035|DGC-3CG-042|DGC-3CG-047|DGC-3CG-173
DGC	NTRK3	4	57.1	15	q25.3	Gain	neurotrophic receptor tyrosine kinase 3	0.0300198	DGC-3CG-035|DGC-3CG-042|DGC-3CG-047|DGC-3CG-173
DGC	NUMB	4	57.1	14	q24.3	Loss	NUMB endocytic adaptor protein	0.0300198	DGC-3CG-035|DGC-3CG-047|DGC-1CG-001|DGC-3CG-173
DGC	PARD3	4	57.1	10	p11.21	Gain|Loss	par-3 family cell polarity regulator	0.00871582	DGC-3CG-064|DGC-1CG-001|DGC-3CG-035|DGC-3CG-047
DGC	PCDH9	4	57.1	13	q21.32	Gain	protocadherin 9	0.317021	DGC-3CG-035|DGC-3CG-047|DGC-3CG-173|DGC-1CG-001
DGC	PCMT1	4	57.1	6	q25.1	Loss	protein-L-isoaspartate (D-aspartate) O-methyltransferase	0.0300198	DGC-3CG-035|DGC-3CG-042|DGC-3CG-047|DGC-3CG-173
DGC	SHC1	4	57.1	1	q21.3	Gain	SHC adaptor protein 1	0.0300198	DGC-3CG-035|DGC-3CG-047|DGC-3CG-173|DGC-8CG-004
DGC	SNAI2	4	57.1	8	q11.21	Gain	snail family transcriptional repressor 2 zinc finger protein|zinc finger protein SNAI2	0.0300198	DGC-3CG-035|DGC-3CG-047|DGC-3CG-173|DGC-8CG-004
DGC	SPRR2A	4	57.1	1	q21.3	Gain	small proline rich protein 2A	0.0300198	DGC-1CG-001|DGC-3CG-047|DGC-3CG-173|DGC-8CG-004
DGC	TAZ	4	57.1	X	q28	Gain	tafazzin	0.0300198	DGC-1CG-001|DGC-3CG-035|DGC-3CG-047|DGC-3CG-173
DGC	TET1	4	57.1	10	q21.3	Loss	tet methylcytosine dioxygenase 1	0.0300198	DGC-3CG-035|DGC-3CG-042|DGC-3CG-173|DGC-3CG-047
DGC	ABCG2	3	42.9	4	q22.1	Loss	ATP binding cassette subfamily G member 2 (Junior blood group)	0.0781407	DGC-3CG-035|DGC-3CG-047|DGC-3CG-173
DGC	CDH1	3	42.9	16	q22.1	Loss	cadherin 1 E-cadherin (epithelial)|cadherin-1|calcium-dependent adhesion protein epithelial|cell-CAM 120/80|epithelial cadherin|uvomorulin	0.0781407	DGC-3CG-035|DGC-3CG-047|DGC-3CG-173
DGC	CDH13	3	42.9	16	q23.3	Gain	cadherin 13	0.0417497	DGC-3CG-035|DGC-3CG-064|DGC-8CG-004
DGC	CLK2	3	42.9	1	q22	Gain	CDC like kinase 2	0.0781407	DGC-3CG-035|DGC-3CG-173|DGC-8CG-004
DGC	CRIM1	3	42.9	2	p22.2	Gain	cysteine rich transmembrane BMP regulator 1	0.0781407	DGC-3CG-035|DGC-1CG-001|DGC-3CG-047
DGC	CRP	3	42.9	1	q23.2	Gain	C-reactive protein	0.0781407	DGC-8CG-004|DGC-3CG-173|DGC-3CG-047
DGC	CXCL12	3	42.9	10	q11.21	Gain	C-X-C motif chemokine ligand 12	0.0781407	DGC-1CG-001|DGC-3CG-035|DGC-3CG-047
DGC	DAB2IP	3	42.9	9	q33.2	Gain	DAB2 interacting protein	0.0781407	DGC-3CG-035|DGC-3CG-047|DGC-3CG-173
DGC	EEF1D	3	42.9	8	q24.3	Gain	eukaryotic translation elongation factor 1 delta	0.0781407	DGC-3CG-047|DGC-3CG-173|DGC-8CG-004
DGC	EFNB2	3	42.9	13	q33.3	Gain	ephrin B2	0.0781407	DGC-3CG-035|DGC-3CG-173|DGC-3CG-047
DGC	EIF4E	3	42.9	4	q23	Loss	eukaryotic translation initiation factor 4E	0.0781407	DGC-1CG-001|DGC-3CG-047|DGC-3CG-173
DGC	ELK1	3	42.9	X	p11.23	Gain	ELK1 ETS transcription factor	0.0781407	DGC-3CG-035|DGC-3CG-047|DGC-3CG-173
DGC	ESR2	3	42.9	14	q23.3	Loss	estrogen receptor 2	0.0781407	DGC-1CG-001|DGC-3CG-047|DGC-3CG-173
DGC	GATA1	3	42.9	X	p11.23	Gain	GATA binding protein 1	0.0781407	DGC-3CG-035|DGC-3CG-047|DGC-3CG-173
DGC	GEMIN2	3	42.9	14	q21.1	Loss	gem nuclear organelle associated protein 2	0.0781407	DGC-1CG-001|DGC-3CG-035|DGC-3CG-047
DGC	GLI2	3	42.9	2	q14.2	Gain	GLI family zinc finger 2	0.0781407	DGC-3CG-035|DGC-3CG-047|DGC-3CG-173
DGC	GRIN1	3	42.9	9	q34.3	Gain	glutamate ionotropic receptor NMDA type subunit 1 subunit zeta-1|N-methyl-D-aspartate receptor subunit NR1|NMD-R1|glutamate [NMDA] receptor subunit zeta 1|glutamate [NMDA] receptor subunit zeta-1	0.0781407	DGC-3CG-035|DGC-3CG-047|DGC-3CG-173
DGC	HAVCR2	3	42.9	5	q33.3	Loss	hepatitis A virus cellular receptor 2	0.0781407	DGC-3CG-035|DGC-3CG-047|DGC-3CG-173
DGC	HDAC6	3	42.9	X	p11.23	Gain	histone deacetylase 6	0.0781407	DGC-3CG-035|DGC-3CG-047|DGC-3CG-173
DGC	HOTAIR	3	42.9	12	q13.13	Gain	HOX transcript antisense RNA	0.0781407	DGC-3CG-035|DGC-3CG-042|DGC-3CG-173
DGC	HOXA10	3	42.9	7	p15.2	Gain	homeobox A10	0.0781407	DGC-3CG-035|DGC-3CG-047|DGC-3CG-173
DGC	HOXA13	3	42.9	7	p15.2	Gain	homeobox A13	0.0781407	DGC-3CG-035|DGC-3CG-047|DGC-3CG-173
DGC	HOXA9	3	42.9	7	p15.2	Gain	homeobox A9	0.0781407	DGC-3CG-035|DGC-3CG-047|DGC-3CG-173
DGC	HS6ST2	3	42.9	X	q26.2	Gain	heparan sulfate 6-O-sulfotransferase 2	0.0781407	DGC-1CG-001|DGC-3CG-047|DGC-3CG-173
DGC	IRF6	3	42.9	1	q32.2	Gain	interferon regulatory factor 6	0.0781407	DGC-1CG-001|DGC-3CG-035|DGC-8CG-004
DGC	IRS2	3	42.9	13	q34	Gain	insulin receptor substrate 2	0.0781407	DGC-3CG-035|DGC-3CG-173|DGC-3CG-047
DGC	LATS1	3	42.9	6	q25.1	Loss	large tumor suppressor kinase 1 Drosophila) homolog 1|WARTS protein kinase|h-warts|large tumor suppressor homolog 1|serine/threonine-protein kinase LATS1	0.0781407	DGC-3CG-035|DGC-3CG-047|DGC-3CG-173
DGC	MEF2D	3	42.9	1	q22	Gain	myocyte enhancer factor 2D	0.0781407	DGC-3CG-047|DGC-3CG-173|DGC-8CG-004
DGC	MIR124-3	3	42.9	20	q13.33	Gain	microRNA 124-3	0.0781407	DGC-3CG-173|DGC-3CG-047|DGC-8CG-004
DGC	MIR196B	3	42.9	7	p15.2	Gain	microRNA 196b	0.0781407	DGC-3CG-035|DGC-3CG-047|DGC-3CG-173
DGC	MIR199A2	3	42.9	1	q24.3	Gain	microRNA 199a-2	0.0781407	DGC-3CG-047|DGC-3CG-173|DGC-8CG-004
DGC	MIR21	3	42.9	17	q23.1	Loss	microRNA 21	0.0781407	DGC-3CG-035|DGC-3CG-047|DGC-3CG-173
DGC	MIR214	3	42.9	1	q24.3	Gain	microRNA 214	0.0781407	DGC-3CG-047|DGC-3CG-173|DGC-8CG-004
DGC	MIR224	3	42.9	X	q28	Gain	microRNA 224	0.0781407	DGC-1CG-001|DGC-3CG-047|DGC-3CG-173
DGC	MIR302A	3	42.9	4	q25	Loss	microRNA 302a	0.0781407	DGC-1CG-001|DGC-3CG-047|DGC-3CG-173
DGC	MIR30B	3	42.9	8	q24.22	Gain	microRNA 30b	0.0781407	DGC-3CG-173|DGC-3CG-035|DGC-3CG-047
DGC	MIR30D	3	42.9	8	q24.22	Gain	microRNA 30d	0.0781407	DGC-3CG-173|DGC-3CG-035|DGC-3CG-047
DGC	MIR452	3	42.9	X	q28	Gain	microRNA 452	0.0781407	DGC-1CG-001|DGC-3CG-047|DGC-3CG-173
DGC	MIR9-1	3	42.9	1	q22	Gain	microRNA 9-1	0.0781407	DGC-3CG-047|DGC-3CG-173|DGC-8CG-004
DGC	MKL1	3	42.9	22	q13.2	Loss	megakaryoblastic leukemia (translocation) 1 SAP and coiled-coil domain|megakaryoblastic leukemia 1 protein|megakaryocytic acute leukemia protein|myocardin-related transcription factor A	0.0781407	DGC-3CG-042|DGC-3CG-047|DGC-3CG-173
DGC	NME1	3	42.9	17	q21.33	Loss	NME/NM23 nucleoside diphosphate kinase 1	0.0781407	DGC-3CG-035|DGC-3CG-047|DGC-3CG-173
DGC	NOTCH1	3	42.9	9	q34.3	Gain|Loss	notch 1 translocation-associated|neurogenic locus notch homolog protein 1|translocation-associated notch protein TAN-1	0.0781407	DGC-1CG-001|DGC-3CG-035|DGC-3CG-173
DGC	NRP2	3	42.9	2	q33.3	Gain	neuropilin 2	0.0781407	DGC-3CG-035|DGC-3CG-047|DGC-3CG-173
DGC	OCLN	3	42.9	5	q13.2	Loss	occludin	0.0781407	DGC-3CG-047|DGC-3CG-035|DGC-3CG-173
DGC	PAG1	3	42.9	8	q21.13	Gain	phosphoprotein membrane anchor with glycosphingolipid microdomains 1	0.0781407	DGC-3CG-035|DGC-3CG-047|DGC-3CG-173
DGC	PAK5	3	42.9	20	p12.2	Gain	p21 (RAC1) activated kinase 5	0.0781407	DGC-8CG-004|DGC-3CG-047|DGC-3CG-173
DGC	PBXIP1	3	42.9	1	q21.3	Gain	PBX homeobox interacting protein 1	0.0781407	DGC-3CG-047|DGC-3CG-173|DGC-8CG-004
DGC	PLA2G4A	3	42.9	1	q31.1	Gain	phospholipase A2 group IVA	0.0781407	DGC-3CG-035|DGC-3CG-047|DGC-3CG-173
DGC	PLAC8	3	42.9	4	q21.22	Loss	placenta specific 8	0.0781407	DGC-1CG-001|DGC-3CG-173|DGC-3CG-047
DGC	PPM1D	3	42.9	17	q23.2	Loss	protein phosphatase Mg2+/Mn2+ dependent 1D	0.0781407	DGC-3CG-035|DGC-3CG-047|DGC-3CG-173
DGC	PRRX1	3	42.9	1	q24.2	Gain	paired related homeobox 1	0.0781407	DGC-3CG-047|DGC-3CG-173|DGC-8CG-004
DGC	PTPN11	3	42.9	12	q24.13	Gain|Loss	protein tyrosine phosphatase non-receptor type 11	0.0781407	DGC-3CG-047|DGC-3CG-064|DGC-3CG-035
DGC	RAC1	3	42.9	7	p22.1	Loss	ras-related C3 botulinum toxin substrate 1 (rho family small GTP binding protein Rac1)	0.273123	DGC-3CG-035|DGC-3CG-042|DGC-3CG-047
DGC	RAF1	3	42.9	3	p25.2	Loss	Raf-1 proto-oncogene serine/threonine kinase	0.0781407	DGC-3CG-035|DGC-3CG-047|DGC-3CG-173
DGC	RASAL2	3	42.9	1	q25.2	Gain	RAS protein activator like 2	0.0781407	DGC-3CG-047|DGC-3CG-173|DGC-8CG-004
DGC	RHOA	3	42.9	3	p21.31	Loss	ras homolog family member A	0.0781407	DGC-1CG-001|DGC-3CG-035|DGC-3CG-047
DGC	RMST	3	42.9	12	q23.1	Gain	rhabdomyosarcoma 2 associated transcript (non-protein coding)	0.0417497	DGC-3CG-035|DGC-3CG-042|DGC-3CG-064
DGC	ROCK1	3	42.9	18	q11.1	Loss	Rho associated coiled-coil containing protein kinase 1 coiled-coil-containing protein kinase 1|rho-associated coiled-coil-containing protein kinase I	0.273123	DGC-1CG-001|DGC-3CG-035|DGC-3CG-042
DGC	RPS6KB1	3	42.9	17	q23.1	Loss	ribosomal protein S6 kinase B1	0.0781407	DGC-3CG-035|DGC-3CG-047|DGC-3CG-173
DGC	S100A8	3	42.9	1	q21.3	Gain	S100 calcium binding protein A8	0.0781407	DGC-3CG-047|DGC-3CG-173|DGC-8CG-004
DGC	S100A9	3	42.9	1	q21.3	Gain	S100 calcium binding protein A9	0.0781407	DGC-3CG-047|DGC-3CG-173|DGC-8CG-004
DGC	SIRT1	3	42.9	10	q21.3	Loss	sirtuin 1	0.0781407	DGC-3CG-035|DGC-3CG-047|DGC-3CG-173
DGC	SNW1	3	42.9	14	q24.3	Loss	SNW domain containing 1 62-kD	0.0781407	DGC-1CG-001|DGC-3CG-035|DGC-3CG-047
DGC	TEAD1	3	42.9	11	p15.3	Gain	TEA domain transcription factor 1	0.0781407	DGC-3CG-035|DGC-3CG-042|DGC-3CG-047
DGC	TGFBR1	3	42.9	9	q22.33	Gain	transforming growth factor beta receptor 1 53kD|activin A receptor type II-like kinase 53kDa|activin A receptor type II-like protein kinase of 53kD|activin receptor-like kinase 5|serine/threonine-protein kinase receptor R4|tbetaR-I|transforming growth factor beta receptor I|transforming growth factor beta receptor I (activin A receptor type II-like kinase 53kD)|transforming growth factor-beta rec…	0.0781407	DGC-3CG-035|DGC-3CG-047|DGC-3CG-173
DGC	TLR4	3	42.9	9	q33.1	Gain	toll like receptor 4	0.0781407	DGC-3CG-035|DGC-3CG-047|DGC-3CG-173
DGC	TM4SF5	3	42.9	17	p13.2	Loss	transmembrane 4 L six family member 5	0.0781407	DGC-1CG-001|DGC-3CG-047|DGC-3CG-173
DGC	TP63	3	42.9	3	q28	Gain|Loss	tumor protein p63	0.0110667	DGC-3CG-042|DGC-3CG-047|DGC-3CG-173
DGC	TRPM8	3	42.9	2	q37.1	Gain|Loss	transient receptor potential cation channel subfamily M member 8	0.0417497	DGC-3CG-047|DGC-1CG-001|DGC-8CG-004
DGC	TXN2	3	42.9	22	q12.3	Loss	thioredoxin 2	0.0781407	DGC-3CG-035|DGC-3CG-047|DGC-3CG-173
DGC	WWOX	3	42.9	16	q23.1	Gain|Loss	WW domain containing oxidoreductase	0.273123	DGC-3CG-064|DGC-8CG-004|DGC-3CG-042
DGC	ZEB2	3	42.9	2	q22.3	Gain	zinc finger E-box binding homeobox 2	0.0781407	DGC-3CG-035|DGC-3CG-047|DGC-1CG-001
DGC	AJAP1	2	28.6	1	p36.32	Gain	adherens junctions associated protein 1	0.172308	DGC-3CG-047|DGC-3CG-035
DGC	ASCL2	2	28.6	11	p15.5	Gain	achaete-scute family bHLH transcription factor 2	0.172308	DGC-3CG-035|DGC-3CG-047
DGC	AXL	2	28.6	19	q13.2	Gain|Loss	AXL receptor tyrosine kinase	0.172308	DGC-3CG-035|DGC-3CG-047
DGC	BAG3	2	28.6	10	q26.11	Loss	BCL2 associated athanogene 3	0.172308	DGC-3CG-047|DGC-8CG-004
DGC	BCL2	2	28.6	18	q21.33	Gain|Loss	BCL2 apoptosis regulator regulatory subunit 50	0.172308	DGC-3CG-035|DGC-3CG-047
DGC	BMP7	2	28.6	20	q13.31	Gain	bone morphogenetic protein 7	0.172308	DGC-3CG-047|DGC-3CG-173
DGC	BRCA1	2	28.6	17	q21.31	Loss	BRCA1 DNA repair associated	0.172308	DGC-1CG-001|DGC-3CG-047
DGC	CEMIP	2	28.6	15	q25.1	Gain	cell migration inducing hyaluronan binding protein	0.172308	DGC-3CG-047|DGC-3CG-173
DGC	CFTR	2	28.6	7	q31.2	Gain	cystic fibrosis transmembrane conductance regulator	0.172308	DGC-3CG-047|DGC-3CG-173
DGC	CRK	2	28.6	17	p13.3	Loss	CRK proto-oncogene adaptor protein	0.172308	DGC-1CG-001|DGC-3CG-047
DGC	CRKL	2	28.6	22	q11.21	Loss	CRK like proto-oncogene adaptor protein	0.172308	DGC-3CG-042|DGC-3CG-047
DGC	CUL4A	2	28.6	13	q34	Gain	cullin 4A	0.172308	DGC-3CG-035|DGC-3CG-173
DGC	CUX1	2	28.6	7	q22.1	Loss	cut like homeobox 1	0.172308	DGC-3CG-035|DGC-3CG-047
DGC	CXCL16	2	28.6	17	p13.2	Loss	C-X-C motif chemokine ligand 16	0.172308	DGC-1CG-001|DGC-3CG-047
DGC	DCLK1	2	28.6	13	q13.3	Gain	doublecortin like kinase 1	0.172308	DGC-3CG-035|DGC-3CG-173
DGC	DKK3	2	28.6	11	p15.3	Gain	dickkopf WNT signaling pathway inhibitor 3	0.172308	DGC-3CG-035|DGC-3CG-047
DGC	EGFL7	2	28.6	9	q34.3	Gain	EGF like domain multiple 7	0.172308	DGC-1CG-001|DGC-3CG-173
DGC	ELK3	2	28.6	12	q23.1	Gain|Loss	ELK3 ETS transcription factor	0.172308	DGC-3CG-064|DGC-3CG-047
DGC	EPB41L3	2	28.6	18	p11.31	Gain|Loss	erythrocyte membrane protein band 4.1 like 3	0.172308	DGC-3CG-047|DGC-1CG-001
DGC	FBLN1	2	28.6	22	q13.31	Loss	fibulin 1	0.0926278	DGC-3CG-047|DGC-8CG-004
DGC	FBXO11	2	28.6	2	p16.3	Loss	F-box protein 11	0.172308	DGC-3CG-035|DGC-3CG-047
DGC	FCN2	2	28.6	9	q34.3	Gain	ficolin 2	0.172308	DGC-3CG-173|DGC-3CG-047
DGC	FGF9	2	28.6	13	q12.11	Gain	fibroblast growth factor 9	0.172308	DGC-3CG-035|DGC-3CG-173
DGC	FGFR1	2	28.6	8	p11.23	Loss	fibroblast growth factor receptor 1	0.172308	DGC-3CG-047|DGC-3CG-173
DGC	FHL1	2	28.6	X	q26.3	Gain	four and a half LIM domains 1	0.337585	DGC-3CG-064|DGC-3CG-173
DGC	FOXC1	2	28.6	6	p25.3	Gain	forkhead box C1 drosophila homolog-like 7|forkhead-related activator 3|forkhead-related protein FKHL7|forkhead-related transcription factor 3|forkhead/winged helix-like transcription factor 7|myeloid factor-delta	0.172308	DGC-3CG-035|DGC-3CG-047
DGC	FOXN1	2	28.6	17	q11.2	Loss	forkhead box N1	0.172308	DGC-3CG-042|DGC-3CG-064
DGC	FOXO1	2	28.6	13	q14.11	Gain|Loss	forkhead box O1	0.172308	DGC-3CG-173|DGC-3CG-047
DGC	GRHL2	2	28.6	8	q22.3	Gain|Loss	grainyhead like transcription factor 2	0.0489297	DGC-3CG-047|DGC-3CG-173
DGC	HDAC9	2	28.6	7	p21.1	Gain	histone deacetylase 9	0.172308	DGC-3CG-047|DGC-3CG-173
DGC	HDGF	2	28.6	1	q23.1	Gain	heparin binding growth factor	0.172308	DGC-3CG-173|DGC-8CG-004
DGC	HINT2	2	28.6	9	p13.3	Gain	histidine triad nucleotide binding protein 2	0.172308	DGC-3CG-047|DGC-3CG-173
DGC	HIP1	2	28.6	7	q11.23	Loss	huntingtin interacting protein 1	0.172308	DGC-3CG-035|DGC-3CG-047
DGC	HOXD9	2	28.6	2	q31.1	Gain	homeobox D9	0.172308	DGC-3CG-035|DGC-3CG-047
DGC	HSP90AA1	2	28.6	14	q32.31	Loss	heat shock protein 90 alpha family class A member 1 alpha|heat shock 90kD protein 1 alpha-like 4|heat shock 90kD protein alpha-like 4|heat shock 90kDa protein 1 alpha|heat shock protein HSP 90-alpha|renal carcinoma antigen NY-REN-38	0.172308	DGC-3CG-035|DGC-3CG-047
DGC	IGFBP3	2	28.6	7	p12.3	Gain	insulin like growth factor binding protein 3	0.172308	DGC-3CG-047|DGC-3CG-173
DGC	IRF8	2	28.6	16	q24.1	Gain	interferon regulatory factor 8	0.172308	DGC-3CG-064|DGC-8CG-004
DGC	IRS1	2	28.6	2	q36.3	Gain	insulin receptor substrate 1	0.172308	DGC-3CG-047|DGC-3CG-173
DGC	ISG15	2	28.6	1	p36.33	Gain	ISG15 ubiquitin-like modifier	0.172308	DGC-3CG-035|DGC-3CG-047
DGC	KCNH1	2	28.6	1	q32.2	Gain	potassium voltage-gated channel subfamily H member 1 Drosophila homolog of|hEAG1|potassium voltage-gated channel subfamily H member 1|voltage-gated potassium channel subunit Kv10.1	0.172308	DGC-1CG-001|DGC-8CG-004
DGC	KDM5A	2	28.6	12	p13.33	Gain|Loss	lysine demethylase 5A	0.172308	DGC-3CG-047|DGC-1CG-001
DGC	KDM6A	2	28.6	X	p11.3	Gain	lysine demethylase 6A	0.172308	DGC-3CG-064|DGC-3CG-173
DGC	KIT	2	28.6	4	q12	Gain	KIT proto-oncogene receptor tyrosine kinase	0.172308	DGC-3CG-042|DGC-3CG-047
DGC	KL	2	28.6	13	q13.1	Gain	klotho	0.172308	DGC-3CG-035|DGC-3CG-173
DGC	KLF5	2	28.6	13	q22.1	Gain|Loss	Kruppel like factor 5	0.172308	DGC-1CG-001|DGC-3CG-047
DGC	L1CAM	2	28.6	X	q28	Gain	L1 cell adhesion molecule	0.172308	DGC-3CG-047|DGC-3CG-173
DGC	LAMC2	2	28.6	1	q25.3	Gain	laminin subunit gamma 2	0.172308	DGC-3CG-173|DGC-8CG-004
DGC	LASP1	2	28.6	17	q12	Loss	LIM and SH3 protein 1	0.172308	DGC-3CG-042|DGC-3CG-047
DGC	LETMD1	2	28.6	12	q13.12	Loss	LETM1 domain containing 1	0.172308	DGC-3CG-035|DGC-3CG-047
DGC	LRRFIP1	2	28.6	2	q37.3	Gain|Loss	LRR binding FLII interacting protein 1	0.172308	DGC-3CG-047|DGC-3CG-064
DGC	MAPK8	2	28.6	10	q11.22	Gain	mitogen-activated protein kinase 8	0.172308	DGC-1CG-001|DGC-3CG-047
DGC	MDM2	2	28.6	12	q15	Gain|Loss	MDM2 proto-oncogene	0.172308	DGC-3CG-047|DGC-3CG-035
DGC	MET	2	28.6	7	q31.2	Gain	MET proto-oncogene receptor tyrosine kinase	0.172308	DGC-3CG-047|DGC-3CG-173
DGC	MICAL2	2	28.6	11	p15.3	Gain	microtubule associated monooxygenase calponin and LIM domain containing 2	0.172308	DGC-3CG-047|DGC-8CG-004
DGC	MIR124-2	2	28.6	8	q12.3	Gain	microRNA 124-2	0.172308	DGC-3CG-047|DGC-3CG-173
DGC	MIR124-2HG	2	28.6	8	q12.3	Gain	MIR124-2 host gene	0.172308	DGC-3CG-047|DGC-3CG-173
DGC	MIR153-2	2	28.6	7	q36.3	Gain	microRNA 153-2	0.172308	DGC-3CG-047|DGC-3CG-173
DGC	MIR208A	2	28.6	14	q11.2	Gain	microRNA 208a	0.172308	DGC-3CG-035|DGC-3CG-047
DGC	MIR29C	2	28.6	1	q32.2	Gain	microRNA 29c	0.172308	DGC-3CG-047|DGC-8CG-004
DGC	MIR331	2	28.6	12	q22	Gain|Loss	microRNA 331	0.172308	DGC-3CG-047|DGC-3CG-064
DGC	MIR361	2	28.6	X	q21.2	Gain	microRNA 361	0.172308	DGC-3CG-064|DGC-3CG-173
DGC	MIR646	2	28.6	20	q13.33	Gain	microRNA 646	0.172308	DGC-3CG-047|DGC-3CG-173
DGC	MLLT3	2	28.6	9	p21.3	Gain	MLLT3 super elongation complex subunit	0.172308	DGC-3CG-035|DGC-3CG-047
DGC	MSLN	2	28.6	16	p13.3	Gain|Loss	mesothelin	0.172308	DGC-3CG-047|DGC-1CG-001
DGC	MSX2	2	28.6	5	q35.2	Loss	msh homeobox 2	0.172308	DGC-1CG-001|DGC-3CG-047
DGC	MTA3	2	28.6	2	p21	Loss	metastasis associated 1 family member 3 member 3|metastasis associated gene family member 3|metastasis-associated protein MTA3	0.172308	DGC-3CG-035|DGC-3CG-047
DGC	MTDH	2	28.6	8	q22.1	Loss	metadherin	0.172308	DGC-3CG-035|DGC-3CG-047
DGC	NANOG	2	28.6	12	p13.31	Loss	Nanog homeobox	0.172308	DGC-3CG-035|DGC-3CG-047
DGC	NCOA3	2	28.6	20	q13.12	Gain	nuclear receptor coactivator 3	0.172308	DGC-3CG-047|DGC-3CG-173
DGC	NCSTN	2	28.6	1	q23.2	Gain	nicastrin	0.172308	DGC-3CG-173|DGC-8CG-004
DGC	NES	2	28.6	1	q23.1	Gain	nestin	0.172308	DGC-3CG-173|DGC-8CG-004
DGC	NF1	2	28.6	17	q11.2	Loss	neurofibromin 1	0.126274	DGC-3CG-047|DGC-3CG-064
DGC	NTN4	2	28.6	12	q22	Gain|Loss	netrin 4	0.172308	DGC-3CG-047|DGC-3CG-064
DGC	PAX2	2	28.6	10	q24.31	Gain	paired box 2	0.172308	DGC-1CG-001|DGC-3CG-035
DGC	PBX3	2	28.6	9	q33.3	Gain	PBX homeobox 3	0.172308	DGC-3CG-047|DGC-3CG-173
DGC	PEBP1	2	28.6	12	q24.23	Gain|Loss	phosphatidylethanolamine binding protein 1	0.172308	DGC-3CG-064|DGC-3CG-047
DGC	PEBP4	2	28.6	8	p21.3	Gain	phosphatidylethanolamine binding protein 4	0.172308	DGC-3CG-035|DGC-8CG-004
DGC	PGRMC1	2	28.6	X	q24	Gain	progesterone receptor membrane component 1	0.172308	DGC-3CG-047|DGC-3CG-173
DGC	PIK3R1	2	28.6	5	q13.1	Gain	phosphoinositide-3-kinase regulatory subunit 1	0.172308	DGC-3CG-035|DGC-3CG-173
DGC	PRKCI	2	28.6	3	q26.2	Loss	protein kinase C iota	0.172308	DGC-3CG-035|DGC-3CG-047
DGC	PTK2	2	28.6	8	q24.3	Gain	protein tyrosine kinase 2	0.172308	DGC-3CG-173|DGC-3CG-047
DGC	RAB22A	2	28.6	20	q13.32	Gain	RAB22A member RAS oncogene family	0.172308	DGC-3CG-047|DGC-3CG-173
DGC	RB1	2	28.6	13	q14.2	Gain|Loss	RB transcriptional corepressor 1	0.172308	DGC-3CG-173|DGC-3CG-064
DGC	ROR1	2	28.6	1	p31.3	Gain	receptor tyrosine kinase like orphan receptor 1	0.172308	DGC-3CG-035|DGC-3CG-042
DGC	RORC	2	28.6	1	q21.3	Gain	RAR related orphan receptor C	0.172308	DGC-3CG-173|DGC-8CG-004
DGC	RUNX2	2	28.6	6	p21.1	Gain	runt related transcription factor 2	0.172308	DGC-3CG-047|DGC-3CG-064
DGC	S100A2	2	28.6	1	q21.3	Gain	S100 calcium binding protein A2	0.172308	DGC-3CG-173|DGC-8CG-004
DGC	S100A4	2	28.6	1	q21.3	Gain	S100 calcium binding protein A4 calvasculin metastasin murine placental homolog)|fibroblast-specific protein-1|leukemia multidrug resistance associated protein|malignant transformation suppression 1|placental calcium-binding protein|protein Mts1|protein S100-A4	0.172308	DGC-3CG-173|DGC-8CG-004
DGC	S100A6	2	28.6	1	q21.3	Gain	S100 calcium binding protein A6	0.172308	DGC-3CG-173|DGC-8CG-004
DGC	SCRIB	2	28.6	8	q24.3	Gain	scribbled planar cell polarity protein	0.172308	DGC-3CG-047|DGC-3CG-173
DGC	SDC2	2	28.6	8	q22.1	Gain	syndecan 2 cell surface-associated|heparan sulfate proteoglycan core protein|syndecan proteoglycan 2|syndecan-2	0.172308	DGC-3CG-047|DGC-3CG-173
DGC	SPOCK1	2	28.6	5	q31.2	Gain|Loss	SPARC/osteonectin cwcv and kazal like domains proteoglycan 1	0.172308	DGC-3CG-035|DGC-3CG-047
DGC	SRC	2	28.6	20	q11.23	Gain	SRC proto-oncogene non-receptor tyrosine kinase Rous sarcoma|tyrosine kinase pp60c-src|tyrosine-protein kinase SRC-1	0.172308	DGC-3CG-047|DGC-3CG-173
DGC	STK26	2	28.6	X	q26.2	Gain	serine/threonine kinase 26	0.172308	DGC-3CG-047|DGC-3CG-173
DGC	TBL1XR1	2	28.6	3	q26.32	Loss	transducin beta like 1 X-linked receptor 1	0.172308	DGC-3CG-042|DGC-3CG-047
DGC	TCF4	2	28.6	18	q21.2	Gain	transcription factor 4	0.172308	DGC-3CG-035|DGC-3CG-047
DGC	TFCP2	2	28.6	12	q13.13	Loss	transcription factor CP2	0.172308	DGC-3CG-035|DGC-3CG-047
DGC	TGFB2	2	28.6	1	q41	Gain	transforming growth factor beta 2	0.172308	DGC-1CG-001|DGC-8CG-004
DGC	TGFBR3	2	28.6	1	p22.1	Loss	transforming growth factor beta receptor 3	0.172308	DGC-3CG-047|DGC-3CG-173
DGC	TGM2	2	28.6	20	q11.23	Gain	transglutaminase 2	0.172308	DGC-3CG-047|DGC-3CG-173
DGC	TIMP1	2	28.6	X	p11.3	Gain	TIMP metallopeptidase inhibitor 1	0.172308	DGC-3CG-047|DGC-3CG-173
DGC	TP73	2	28.6	1	p36.32	Gain	tumor protein p73	0.172308	DGC-3CG-047|DGC-8CG-004
DGC	TRIM11	2	28.6	1	q42.13	Gain	tripartite motif containing 11	0.172308	DGC-3CG-173|DGC-8CG-004
DGC	TRPC5	2	28.6	X	q23	Gain	transient receptor potential cation channel subfamily C member 5	0.172308	DGC-1CG-001|DGC-3CG-173
DGC	TUFT1	2	28.6	1	q21.3	Gain	tuftelin 1	0.172308	DGC-3CG-173|DGC-8CG-004
DGC	WASF3	2	28.6	13	q12.13	Gain	WAS protein family member 3	0.172308	DGC-3CG-035|DGC-3CG-173
DGC	WISP2	2	28.6	20	q13.12	Gain	WNT1 inducible signaling pathway protein 2	0.172308	DGC-3CG-047|DGC-3CG-173
DGC	WWTR1	2	28.6	3	q25.1	Loss	WW domain containing transcription regulator 1	0.172308	DGC-3CG-035|DGC-3CG-047
DGC	XRN2	2	28.6	20	p11.22	Gain	5'-3' exoribonuclease 2	0.172308	DGC-3CG-047|DGC-3CG-173
DGC	YAP1	2	28.6	11	q22.1	Loss	Yes associated protein 1	0.172308	DGC-3CG-173|DGC-3CG-047
DGC	ZBTB33	2	28.6	X	q24	Gain	zinc finger and BTB domain containing 33	0.172308	DGC-1CG-001|DGC-3CG-173
DGC	AGO2	1	14.3	8	q24.3	Gain	argonaute 2 RISC catalytic component	0.355918	DGC-3CG-173
DGC	ACTA2	1	14.3	10	q23.31	Gain	actin alpha 2 smooth muscle aorta	0.355918	DGC-1CG-001
DGC	ACVR1	1	14.3	2	q24.1	Gain	activin A receptor type 1 type II-like kinase 2|activin receptor type I|activin receptor type-1|activin receptor-like kinase 2|hydroxyalkyl-protein kinase|serine/threonine-protein kinase receptor R1	0.355918	DGC-3CG-047
DGC	ADAM10	1	14.3	15	q21.3	Loss	ADAM metallopeptidase domain 10	0.355918	DGC-3CG-047
DGC	ADAM12	1	14.3	10	q26.2	Gain	ADAM metallopeptidase domain 12	0.355918	DGC-1CG-001
DGC	AFAP1L2	1	14.3	10	q25.3	Gain	actin filament associated protein 1 like 2	0.355918	DGC-1CG-001
DGC	AGTR1	1	14.3	3	q24	Gain	angiotensin II receptor type 1	0.355918	DGC-3CG-047
DGC	AHR	1	14.3	7	p21.1	Gain	aryl hydrocarbon receptor	0.355918	DGC-3CG-173
DGC	AKTIP	1	14.3	16	q12.2	Loss	AKT interacting protein	0.355918	DGC-3CG-047
DGC	ALDOB	1	14.3	9	q31.1	Gain	aldolase fructose-bisphosphate B	0.355918	DGC-3CG-035
DGC	ALX4	1	14.3	11	p11.2	Gain	ALX homeobox 4	0.355918	DGC-3CG-047
DGC	ANXA2	1	14.3	15	q22.2	Gain	annexin A2	0.355918	DGC-3CG-064
DGC	ATM	1	14.3	11	q22.3	Loss	ATM serine/threonine kinase telomere maintenance 1 homolog|serine-protein kinase ATM	0.355918	DGC-3CG-047
DGC	AURKA	1	14.3	20	q13.2	Gain	aurora kinase A regulatory subunit 47|serine/threonine kinase 6|serine/threonine protein kinase 15|serine/threonine-protein kinase 15|serine/threonine-protein kinase 6|serine/threonine-protein kinase aurora-A	0.355918	DGC-3CG-173
DGC	AXIN1	1	14.3	16	p13.3	Loss	axin 1 homolog of|protein phosphatase 1 regulatory subunit 49	0.355918	DGC-3CG-035
DGC	BCL2L1	1	14.3	20	q11.21	Gain	BCL2 like 1 regulatory subunit 52	0.355918	DGC-3CG-173
DGC	BCL6	1	14.3	3	q27.3	Gain	B-cell CLL/lymphoma 6	0.355918	DGC-3CG-047
DGC	BHLHE40	1	14.3	3	p26.1	Loss	basic helix-loop-helix family member e40	0.355918	DGC-3CG-047
DGC	BIRC2	1	14.3	11	q22.2	Loss	baculoviral IAP repeat containing 2	0.355918	DGC-3CG-047
DGC	BMP6	1	14.3	6	p24.3	Gain	bone morphogenetic protein 6	0.355918	DGC-3CG-047
DGC	BOP1	1	14.3	8	q24.3	Gain	block of proliferation 1	0.355918	DGC-3CG-173
DGC	BRF2	1	14.3	8	p11.23	Loss	BRF2 RNA polymerase III transcription initiation factor subunit	0.355918	DGC-3CG-047
DGC	C5AR1	1	14.3	19	q13.32	Loss	complement C5a receptor 1	0.355918	DGC-3CG-047
DGC	CAMK1D	1	14.3	10	p13	Loss	calcium/calmodulin dependent protein kinase ID	0.355918	DGC-3CG-047
DGC	CAPZA1	1	14.3	1	p13.2	Loss	capping actin protein of muscle Z-line alpha subunit 1	0.355918	DGC-3CG-047
DGC	CARD10	1	14.3	22	q13.1	Loss	caspase recruitment domain family member 10	0.355918	DGC-3CG-173
DGC	CAV1	1	14.3	7	q31.2	Loss	caveolin 1	0.182717	DGC-3CG-035
DGC	CBLB	1	14.3	3	q13.11	Loss	Cbl proto-oncogene B	0.355918	DGC-3CG-173
DGC	CBY1	1	14.3	22	q13.1	Loss	chibby family member 1 beta catenin antagonist	0.355918	DGC-3CG-047
DGC	CCL2	1	14.3	17	q12	Gain	C-C motif chemokine ligand 2	0.355918	DGC-3CG-047
DGC	CCL22	1	14.3	16	q21	Loss	C-C motif chemokine ligand 22	0.355918	DGC-3CG-047
DGC	CCL25	1	14.3	19	p13.2	Loss	C-C motif chemokine ligand 25	0.355918	DGC-3CG-047
DGC	CCNA2	1	14.3	4	q27	Loss	cyclin A2	0.355918	DGC-3CG-047
DGC	CCND1	1	14.3	11	q13.3	Gain	cyclin D1	0.355918	DGC-3CG-047
DGC	CCND2	1	14.3	12	p13.32	Gain	cyclin D2	0.355918	DGC-3CG-047
DGC	CCNG2	1	14.3	4	q21.1	Gain	cyclin G2	0.355918	DGC-3CG-047
DGC	CD14	1	14.3	5	q31.3	Loss	CD14 molecule	0.355918	DGC-3CG-047
DGC	CD36	1	14.3	7	q21.11	Gain	CD36 molecule	0.355918	DGC-3CG-173
DGC	CD44	1	14.3	11	p13	Gain	CD44 molecule (Indian blood group)	0.355918	DGC-3CG-047
DGC	CDH11	1	14.3	16	q21	Gain	cadherin 11	1	DGC-8CG-004
DGC	CDH5	1	14.3	16	q21	Gain	cadherin 5	0.355918	DGC-8CG-004
DGC	CDKL2	1	14.3	4	q21.1	Loss	cyclin dependent kinase like 2	0.355918	DGC-1CG-001
DGC	CDX2	1	14.3	13	q12.2	Gain	caudal type homeobox 2	0.355918	DGC-3CG-173
DGC	CEACAM5	1	14.3	19	q13.2	Gain	carcinoembryonic antigen related cell adhesion molecule 5	0.355918	DGC-3CG-064
DGC	CEACAM6	1	14.3	19	q13.2	Gain	carcinoembryonic antigen related cell adhesion molecule 6	0.355918	DGC-3CG-064
DGC	CEBPB	1	14.3	20	q13.13	Gain	CCAAT/enhancer binding protein beta	0.355918	DGC-3CG-173
DGC	CERS6	1	14.3	2	q24.3	Gain	ceramide synthase 6	0.355918	DGC-3CG-047
DGC	CKS2	1	14.3	9	q22.2	Gain	CDC28 protein kinase regulatory subunit 2	0.355918	DGC-3CG-173
DGC	CLDN1	1	14.3	3	q28	Gain	claudin 1	0.355918	DGC-3CG-047
DGC	CLU	1	14.3	8	p21.1	Gain	clusterin 40|ku70-binding protein 1|sulfated glycoprotein 2|testosterone-repressed prostate message 2	0.355918	DGC-1CG-001
DGC	CNTN1	1	14.3	12	q12	Gain	contactin 1	0.355918	DGC-3CG-047
DGC	COL8A1	1	14.3	3	q12.1	Gain	collagen type VIII alpha 1 chain alpha-1 polypeptide|collagen alpha-1(VIII) chain|endothelial collagen|smooth muscle cell-expressed and macrophage conditioned medium-induced protein smag-64	0.355918	DGC-3CG-047
DGC	COL8A2	1	14.3	1	p34.3	Loss	collagen type VIII alpha 2 chain alpha-2 polypeptide|collagen alpha-2(VIII) chain|dJ665N4.1 (collagen type VIII alpha 2)|endothelial collagen	0.355918	DGC-3CG-047
DGC	CPS1-IT1	1	14.3	2	q34	Gain	CPS1 intronic transcript 1	0.355918	DGC-3CG-047
DGC	CREBBP	1	14.3	16	p13.3	Gain	CREB binding protein	0.355918	DGC-3CG-047
DGC	CRMP1	1	14.3	4	p16.2	Gain	collapsin response mediator protein 1	0.355918	DGC-3CG-047
DGC	CRYAB	1	14.3	11	q23.1	Loss	crystallin alpha B	0.355918	DGC-3CG-047
DGC	CTHRC1	1	14.3	8	q22.3	Gain	collagen triple helix repeat containing 1	0.355918	DGC-3CG-173
DGC	CTNNB1	1	14.3	3	p22.1	Gain	catenin beta 1	0.355918	DGC-3CG-042
DGC	CTSZ	1	14.3	20	q13.32	Gain	cathepsin Z	0.355918	DGC-3CG-173
DGC	CUL3	1	14.3	2	q36.2	Gain	cullin 3	0.355918	DGC-3CG-047
DGC	CX3CL1	1	14.3	16	q21	Loss	C-X3-C motif chemokine ligand 1	0.355918	DGC-3CG-047
DGC	CXCL13	1	14.3	4	q21.1	Gain	C-X-C motif chemokine ligand 13	0.355918	DGC-3CG-047
DGC	CXCL14	1	14.3	5	q31.1	Gain	C-X-C motif chemokine ligand 14	0.355918	DGC-3CG-035
DGC	CXCL5	1	14.3	4	q13.3	Gain	C-X-C motif chemokine ligand 5 member 5 (epithelial-derived neutrophil-activating peptide 78)|small-inducible cytokine B5	0.355918	DGC-3CG-047
DGC	CXCL8	1	14.3	4	q13.3	Gain	C-X-C motif chemokine ligand 8	0.355918	DGC-3CG-047
DGC	CXCR2	1	14.3	2	q35	Gain	C-X-C motif chemokine receptor 2	0.355918	DGC-3CG-047
DGC	CXCR4	1	14.3	2	q22.1	Gain	C-X-C motif chemokine receptor 4 spleen|stromal cell-derived factor 1 receptor	0.355918	DGC-3CG-047
DGC	CYB5R1	1	14.3	1	q32.1	Gain	cytochrome b5 reductase 1	0.355918	DGC-8CG-004
DGC	DAPK1	1	14.3	9	q21.33	Gain	death associated protein kinase 1	0.355918	DGC-3CG-173
DGC	DICER1	1	14.3	14	q32.13	Gain	dicer 1 ribonuclease III	0.355918	DGC-3CG-047
DGC	DNMT1	1	14.3	19	p13.2	Loss	DNA methyltransferase 1	0.355918	DGC-3CG-047
DGC	DNMT3B	1	14.3	20	q11.21	Gain	DNA methyltransferase 3 beta	0.355918	DGC-3CG-173
DGC	EFEMP1	1	14.3	2	p16.1	Gain	EGF containing fibulin like extracellular matrix protein 1	0.355918	DGC-3CG-047
DGC	EIF2AK3	1	14.3	2	p11.2	Gain	eukaryotic translation initiation factor 2 alpha kinase 3	0.355918	DGC-3CG-047
DGC	ENG	1	14.3	9	q34.11	Gain	endoglin	0.355918	DGC-3CG-173
DGC	EPAS1	1	14.3	2	p21	Gain	endothelial PAS domain protein 1	0.355918	DGC-3CG-047
DGC	EPCAM	1	14.3	2	p21	Loss	epithelial cell adhesion molecule chromosome 4 surface marker (35kD glycoprotein)|tumor-associated calcium signal transducer 1	0.355918	DGC-3CG-047
DGC	EPHA4	1	14.3	2	q36.1	Gain	EPH receptor A4	0.355918	DGC-3CG-047
DGC	EPS8	1	14.3	12	p12.3	Gain	epidermal growth factor receptor pathway substrate 8	0.355918	DGC-3CG-047
DGC	ERBIN	1	14.3	5	q12.3	Loss	erbb2 interacting protein	0.355918	DGC-3CG-047
DGC	ERF	1	14.3	19	q13.2	Gain	ETS2 repressor factor	0.355918	DGC-3CG-035
DGC	ESRP1	1	14.3	8	q22.1	Loss	epithelial splicing regulatory protein 1	0.355918	DGC-3CG-047
DGC	ESRP2	1	14.3	16	q22.1	Loss	epithelial splicing regulatory protein 2	0.355918	DGC-3CG-047
DGC	EXOC4	1	14.3	7	q33	Gain	exocyst complex component 4	0.355918	DGC-3CG-173
DGC	EZR	1	14.3	6	q25.3	Loss	ezrin	0.355918	DGC-3CG-047
DGC	F2R	1	14.3	5	q13.3	Loss	coagulation factor II thrombin receptor	0.355918	DGC-3CG-047
DGC	FAS	1	14.3	10	q23.31	Gain	Fas cell surface death receptor	0.355918	DGC-1CG-001
DGC	FBP1	1	14.3	9	q22.32	Loss	fructose-bisphosphatase 1	0.355918	DGC-3CG-047
DGC	FBXW7	1	14.3	4	q31.3	Loss	F-box and WD repeat domain containing 7	0.355918	DGC-3CG-047
DGC	FERMT2	1	14.3	14	q22.1	Loss	fermitin family member 2	0.355918	DGC-3CG-047
DGC	FGFR2	1	14.3	10	q26.13	Gain	fibroblast growth factor receptor 2 receptor like 14|soluble FGFR4 variant 4	0.355918	DGC-1CG-001
DGC	FHL2	1	14.3	2	q12.2	Gain	four and a half LIM domains 2	0.355918	DGC-3CG-047
DGC	FHOD1	1	14.3	16	q22.1	Loss	formin homology 2 domain containing 1	0.355918	DGC-3CG-047
DGC	FKBP5	1	14.3	6	p21.31	Loss	FK506 binding protein 5	0.355918	DGC-3CG-047
DGC	FOXC2	1	14.3	16	q24.1	Gain	forkhead box C2	0.355918	DGC-8CG-004
DGC	FOXQ1	1	14.3	6	p25.3	Gain	forkhead box Q1	0.355918	DGC-3CG-047
DGC	FRAT1	1	14.3	10	q24.1	Loss	FRAT1 WNT signaling pathway regulator	0.355918	DGC-3CG-047
DGC	GDF15	1	14.3	19	p13.11	Loss	growth differentiation factor 15	0.355918	DGC-3CG-047
DGC	GIPC2	1	14.3	1	p31.1	Loss	GIPC PDZ domain containing family member 2	0.355918	DGC-3CG-047
DGC	GJB2	1	14.3	13	q12.11	Gain	gap junction protein beta 2	0.355918	DGC-3CG-173
DGC	GKN2	1	14.3	2	p13.3	Gain	gastrokine 2	0.355918	DGC-3CG-047
DGC	GLRX	1	14.3	5	q15	Loss	glutaredoxin	0.355918	DGC-3CG-047
DGC	GLS	1	14.3	2	q32.2	Gain	glutaminase	0.355918	DGC-3CG-047
DGC	GLS2	1	14.3	12	q13.3	Loss	glutaminase 2	0.355918	DGC-3CG-047
DGC	GOLGA2	1	14.3	9	q34.11	Gain	golgin A2	0.355918	DGC-3CG-173
DGC	GOLPH3	1	14.3	5	p13.3	Loss	golgi phosphoprotein 3	0.552421	DGC-3CG-047
DGC	GSK3A	1	14.3	19	q13.2	Gain	glycogen synthase kinase 3 alpha	0.355918	DGC-3CG-035
DGC	GSN	1	14.3	9	q33.2	Gain	gelsolin	0.355918	DGC-3CG-173
DGC	HAS2	1	14.3	8	q24.13	Gain	hyaluronan synthase 2	0.355918	DGC-3CG-173
DGC	HAS2-AS1	1	14.3	8	q24.13	Gain	HAS2 antisense RNA 1	0.355918	DGC-3CG-173
DGC	HDAC4	1	14.3	2	q37.3	Gain	histone deacetylase 4	0.355918	DGC-3CG-047
DGC	HES1	1	14.3	3	q29	Gain	hes family bHLH transcription factor 1	0.355918	DGC-3CG-047
DGC	HGF	1	14.3	7	q21.11	Gain	hepatocyte growth factor	0.355918	DGC-3CG-064
DGC	HK2	1	14.3	2	p12	Gain	hexokinase 2	0.355918	DGC-3CG-047
DGC	HNF4A	1	14.3	20	q13.12	Gain	hepatocyte nuclear factor 4 alpha	0.355918	DGC-3CG-173
DGC	HNRNPAB	1	14.3	5	q35.3	Loss	heterogeneous nuclear ribonucleoprotein A/B	0.355918	DGC-3CG-047
DGC	HPSE	1	14.3	4	q21.23	Loss	heparanase	0.355918	DGC-3CG-047
DGC	HRG	1	14.3	3	q27.3	Gain	histidine rich glycoprotein	0.355918	DGC-3CG-047
DGC	HS3ST3B1	1	14.3	17	p12	Loss	heparan sulfate-glucosamine 3-sulfotransferase 3B1	0.182717	DGC-3CG-047
DGC	HSF1	1	14.3	8	q24.3	Gain	heat shock transcription factor 1	0.355918	DGC-3CG-173
DGC	HSPA4	1	14.3	5	q31.1	Loss	heat shock protein family A (Hsp70) member 4 110 kDa|hsp70 RY	0.355918	DGC-3CG-047
DGC	HSPA5	1	14.3	9	q33.3	Loss	heat shock protein family A (Hsp70) member 5	0.355918	DGC-3CG-047
DGC	HSPB2	1	14.3	11	q23.1	Loss	heat shock protein family B (small) member 2	0.355918	DGC-3CG-047
DGC	IGF1	1	14.3	12	q23.2	Gain	insulin like growth factor 1	0.355918	DGC-3CG-064
DGC	IKBKG	1	14.3	X	q28	Gain	inhibitor of nuclear factor kappa B kinase subunit gamma	0.355918	DGC-1CG-001
DGC	IL17RD	1	14.3	3	p14.3	Loss	interleukin 17 receptor D	0.355918	DGC-3CG-047
DGC	IL18	1	14.3	11	q23.1	Loss	interleukin 18	0.355918	DGC-3CG-047
DGC	IL1B	1	14.3	2	q14.1	Gain	interleukin 1 beta	0.355918	DGC-3CG-047
DGC	ITGA6	1	14.3	2	q31.1	Gain	integrin subunit alpha 6	0.355918	DGC-3CG-047
DGC	ITGB6	1	14.3	2	q24.2	Gain	integrin subunit beta 6	0.355918	DGC-3CG-047
DGC	JAK3	1	14.3	19	p13.11	Loss	Janus kinase 3	0.355918	DGC-3CG-047
DGC	JUN	1	14.3	1	p32.1	Gain	Jun proto-oncogene AP-1 transcription factor subunit	0.355918	DGC-3CG-035
DGC	KAT2B	1	14.3	3	p24.3	Loss	lysine acetyltransferase 2B	0.355918	DGC-3CG-047
DGC	KDM3A	1	14.3	2	p11.2	Gain	lysine demethylase 3A	0.355918	DGC-3CG-047
DGC	KDM5B	1	14.3	1	q32.1	Gain	lysine demethylase 5B	0.355918	DGC-8CG-004
DGC	KDM6B	1	14.3	17	p13.1	Loss	lysine demethylase 6B	0.355918	DGC-1CG-001
DGC	KHDRBS1	1	14.3	1	p35.2	Loss	KH RNA binding domain containing signal transduction associated 1 RNA-binding signal transduction-associated protein 1|p21 Ras GTPase-activating protein-associated p62|src-associated in mitosis 68 kDa protein signal transduction-associated protein 1|p21 Ras GTPase-activating protein-associated p62|src-associated in mitosis 68 kDa protein	0.355918	DGC-3CG-047
DGC	KLF4	1	14.3	9	q31.2	Loss	Kruppel like factor 4	0.355918	DGC-3CG-047
DGC	KLF8	1	14.3	X	p11.21	Gain	Kruppel like factor 8	0.355918	DGC-3CG-173
DGC	KMT5A	1	14.3	12	q24.31	Loss	lysine methyltransferase 5A	0.355918	DGC-3CG-047
DGC	KRAS	1	14.3	12	p12.1	Gain	KRAS proto-oncogene GTPase	0.355918	DGC-3CG-047
DGC	KRT17	1	14.3	17	q21.2	Gain	keratin 17	0.355918	DGC-3CG-047
DGC	KRT19	1	14.3	17	q21.2	Gain	keratin 19 type I cytoskeletal 19|keratin type I 40-kd|keratin-19	0.355918	DGC-3CG-047
DGC	KRT7	1	14.3	12	q13.13	Gain	keratin 7	0.355918	DGC-3CG-035
DGC	LAMA5	1	14.3	20	q13.33	Gain	laminin subunit alpha 5	0.355918	DGC-3CG-173
DGC	LCN2	1	14.3	9	q34.11	Gain	lipocalin 2	0.355918	DGC-3CG-173
DGC	LEF1	1	14.3	4	q25	Gain	lymphoid enhancer binding factor 1	0.273123	DGC-3CG-035
DGC	LGALS1	1	14.3	22	q13.1	Loss	galectin 1	0.355918	DGC-3CG-173
DGC	LGALS9	1	14.3	17	q11.2	Gain	galectin 9	0.355918	DGC-3CG-047
DGC	LHX2	1	14.3	9	q33.3	Gain	LIM homeobox 2	0.355918	DGC-3CG-173
DGC	LIMA1	1	14.3	12	q13.12	Loss	LIM domain and actin binding 1	0.355918	DGC-3CG-047
DGC	LMNA	1	14.3	1	q22	Gain	lamin A/C	0.355918	DGC-3CG-173
DGC	LMNB1	1	14.3	5	q23.2	Loss	lamin B1	0.355918	DGC-3CG-047
DGC	LOXL2	1	14.3	8	p21.3	Loss	lysyl oxidase like 2	0.355918	DGC-3CG-047
DGC	MAP4K4	1	14.3	2	q11.2	Gain	mitogen-activated protein kinase kinase kinase kinase 4	0.355918	DGC-3CG-047
DGC	MAPK1	1	14.3	22	q11.22	Loss	mitogen-activated protein kinase 1	0.355918	DGC-3CG-047
DGC	MARVELD1	1	14.3	10	q24.2	Gain	MARVEL domain containing 1	0.355918	DGC-1CG-001
DGC	MARVELD3	1	14.3	16	q22.2	Loss	MARVEL domain containing 3	0.355918	DGC-3CG-047
DGC	MDM4	1	14.3	1	q32.1	Gain	MDM4 p53 regulator	0.355918	DGC-8CG-004
DGC	MEG3	1	14.3	14	q32.2	Gain	maternally expressed 3 (non-protein coding)	0.355918	DGC-3CG-047
DGC	MGLL	1	14.3	3	q21.3	Gain	monoglyceride lipase	0.355918	DGC-3CG-047
DGC	MIR101-1	1	14.3	1	p31.3	Loss	microRNA 101-1	0.355918	DGC-3CG-047
DGC	MIR106A	1	14.3	X	q26.2	Gain	microRNA 106a	0.355918	DGC-3CG-173
DGC	MIR10B	1	14.3	2	q31.1	Gain	microRNA 10b	0.355918	DGC-3CG-047
DGC	MIR1181	1	14.3	19	p13.2	Loss	microRNA 1181	0.355918	DGC-3CG-047
DGC	MIR1271	1	14.3	5	q35.2	Loss	microRNA 1271	0.355918	DGC-3CG-047
DGC	MIR128-1	1	14.3	2	q21.3	Loss	microRNA 128-1	0.355918	DGC-3CG-173
DGC	MIR130B	1	14.3	22	q11.21	Loss	microRNA 130b	0.355918	DGC-3CG-047
DGC	MIR134	1	14.3	14	q32.31	Gain	microRNA 134	0.355918	DGC-3CG-047
DGC	MIR135B	1	14.3	1	q32.1	Gain	microRNA 135b	0.355918	DGC-8CG-004
DGC	MIR136	1	14.3	14	q32.2	Gain	microRNA 136	0.355918	DGC-3CG-047
DGC	MIR149	1	14.3	2	q37.3	Gain	microRNA 149	0.355918	DGC-3CG-047
DGC	MIR17	1	14.3	13	q31.3	Gain	microRNA 17	0.355918	DGC-3CG-173
DGC	MIR181A2	1	14.3	9	q33.3	Gain	microRNA 181a-2	0.355918	DGC-3CG-173
DGC	MIR190A	1	14.3	15	q22.2	Gain	microRNA 190a	0.355918	DGC-3CG-047
DGC	MIR194-1	1	14.3	1	q41	Loss	microRNA 194-1	0.355918	DGC-3CG-047
DGC	MIR199A1	1	14.3	19	p13.2	Loss	microRNA 199a-1	0.355918	DGC-3CG-047
DGC	MIR19A	1	14.3	13	q31.3	Gain	microRNA 19a	0.355918	DGC-3CG-173
DGC	MIR200A	1	14.3	1	p36.33	Gain	microRNA 200a	0.355918	DGC-3CG-047
DGC	MIR200B	1	14.3	1	p36.33	Gain	microRNA 200b	0.355918	DGC-3CG-047
DGC	MIR20A	1	14.3	13	q31.3	Gain	microRNA 20a	0.355918	DGC-3CG-173
DGC	MIR216A	1	14.3	2	p16.1	Gain	microRNA 216a	0.355918	DGC-3CG-047
DGC	MIR217	1	14.3	2	p16.1	Gain	microRNA 217	0.355918	DGC-3CG-047
DGC	MIR23B	1	14.3	9	q22.32	Gain	microRNA 23b	0.355918	DGC-3CG-047
DGC	MIR24-1	1	14.3	9	q22.32	Gain	microRNA 24-1	0.355918	DGC-3CG-047
DGC	MIR300	1	14.3	14	q32.31	Gain	microRNA 300	0.355918	DGC-3CG-047
DGC	MIR301A	1	14.3	17	q22	Loss	microRNA 301a	0.355918	DGC-3CG-047
DGC	MIR33A	1	14.3	22	q13.2	Loss	microRNA 33a	0.355918	DGC-3CG-047
DGC	MIR375	1	14.3	2	q35	Gain	microRNA 375	0.355918	DGC-3CG-047
DGC	MIR381	1	14.3	14	q32.31	Gain	microRNA 381	0.355918	DGC-3CG-047
DGC	MIR382	1	14.3	14	q32.31	Gain	microRNA 382	0.355918	DGC-3CG-047
DGC	MIR429	1	14.3	1	p36.33	Gain	microRNA 429	0.355918	DGC-3CG-047
DGC	MIR449A	1	14.3	5	q11.2	Loss	microRNA 449a	0.355918	DGC-3CG-047
DGC	MIR454	1	14.3	17	q22	Loss	microRNA 454	0.355918	DGC-3CG-047
DGC	MIR485	1	14.3	14	q32.31	Gain	microRNA 485	0.355918	DGC-3CG-047
DGC	MIR487B	1	14.3	14	q32.31	Gain	microRNA 487b	0.355918	DGC-3CG-047
DGC	MIR494	1	14.3	14	q32.31	Gain	microRNA 494	0.355918	DGC-3CG-047
DGC	MIR497	1	14.3	17	p13.1	Loss	microRNA 497	0.355918	DGC-3CG-047
DGC	MIR639	1	14.3	19	p13.12	Loss	microRNA 639	0.355918	DGC-3CG-047
DGC	MIR655	1	14.3	14	q32.31	Gain	microRNA 655	0.355918	DGC-3CG-047
DGC	MIR7-1	1	14.3	9	q21.32	Loss	microRNA 7-1	0.355918	DGC-3CG-047
DGC	MKL2	1	14.3	16	p13.12	Gain	MKL1/myocardin like 2	0.355918	DGC-3CG-047
DGC	MMP11	1	14.3	22	q11.23	Loss	matrix metallopeptidase 11	0.355918	DGC-3CG-047
DGC	MMP2	1	14.3	16	q12.2	Gain	matrix metallopeptidase 2	0.355918	DGC-8CG-004
DGC	MMP9	1	14.3	20	q13.12	Gain	matrix metallopeptidase 9 92kDa gelatinase 92kDa type IV collagenase)|matrix metalloproteinase-9|type V collagenase	0.355918	DGC-3CG-173
DGC	MSI2	1	14.3	17	q22	Gain|Loss	musashi RNA binding protein 2	0.355918	DGC-3CG-047
DGC	MSN	1	14.3	X	q12	Gain	moesin	0.355918	DGC-1CG-001
DGC	MTUS1	1	14.3	8	p22	Loss	microtubule associated scaffold protein 1	0.355918	DGC-3CG-047
DGC	MYB	1	14.3	6	q23.3	Gain	MYB proto-oncogene transcription factor	0.355918	DGC-3CG-173
DGC	MYC	1	14.3	8	q24.21	Gain	MYC proto-oncogene bHLH transcription factor	0.355918	DGC-3CG-173
DGC	NFIC	1	14.3	19	p13.3	Loss	nuclear factor I C	0.355918	DGC-3CG-047
DGC	NFKBIA	1	14.3	14	q13.2	Loss	NFKB inhibitor alpha	0.355918	DGC-3CG-047
DGC	NODAL	1	14.3	10	q22.1	Gain	nodal growth differentiation factor	0.355918	DGC-1CG-001
DGC	NOTCH2	1	14.3	1	p12	Gain	notch 2	0.355918	DGC-3CG-047
DGC	NOV	1	14.3	8	q24.12	Gain	nephroblastoma overexpressed	0.355918	DGC-3CG-173
DGC	NR5A2	1	14.3	1	q32.1	Loss	nuclear receptor subfamily 5 group A member 2	0.355918	DGC-3CG-047
DGC	NREP	1	14.3	5	q22.1	Loss	neuronal regeneration related protein	0.355918	DGC-3CG-047
DGC	NTN1	1	14.3	17	p13.1	Loss	netrin 1	0.355918	DGC-1CG-001
DGC	NUAK1	1	14.3	12	q23.3	Gain	NUAK family kinase 1	0.355918	DGC-3CG-064
DGC	OLA1	1	14.3	2	q31.1	Gain	Obg like ATPase 1	0.355918	DGC-3CG-047
DGC	PAK1	1	14.3	11	q14.1	Gain	p21 (RAC1) activated kinase 1 yeast|alpha-PAK|p21/Cdc42/Rac1-activated kinase 1 (STE20 homolog yeast)|p21/Cdc42/Rac1-activated kinase 1 (yeast Ste20-related)|p65-PAK|serine/threonine-protein kinase PAK 1	0.355918	DGC-3CG-047
DGC	PAK4	1	14.3	19	q13.2	Loss	p21 (RAC1) activated kinase 4	0.355918	DGC-3CG-047
DGC	PAQR3	1	14.3	4	q21.21	Gain	progestin and adipoQ receptor family member 3	0.355918	DGC-3CG-047
DGC	PARD6A	1	14.3	16	q22.1	Loss	par-6 family cell polarity regulator alpha	0.355918	DGC-3CG-047
DGC	PAWR	1	14.3	12	q21.2	Loss	pro-apoptotic WT1 regulator	0.355918	DGC-3CG-047
DGC	PDCD6IP	1	14.3	3	p22.3	Loss	programmed cell death 6 interacting protein	0.355918	DGC-3CG-047
DGC	PDE4A	1	14.3	19	p13.2	Loss	phosphodiesterase 4A 5'-cyclic phosphodiesterase 4A|phosphodiesterase 4A cAMP-specific (dunce|phosphodiesterase E2 dunce homolog Drosophila|phosphodiesterase isozyme 4	0.355918	DGC-3CG-047
DGC	PEG10	1	14.3	7	q21.3	Gain	paternally expressed 10	0.355918	DGC-3CG-173
DGC	PFN2	1	14.3	3	q25.1	Gain	profilin 2	0.355918	DGC-3CG-047
DGC	PHLDA2	1	14.3	11	p15.4	Gain	pleckstrin homology like domain family A member 2	0.355918	DGC-3CG-047
DGC	PIM2	1	14.3	X	p11.23	Gain	Pim-2 proto-oncogene serine/threonine kinase	0.355918	DGC-3CG-173
DGC	PIN1	1	14.3	19	p13.2	Loss	peptidylprolyl cis/trans isomerase NIMA-interacting 1	0.355918	DGC-3CG-047
DGC	PKD1	1	14.3	16	p13.3	Gain	polycystin 1 transient receptor potential channel interacting	0.355918	DGC-3CG-047
DGC	PLS3	1	14.3	X	q23	Gain	plastin 3	1	DGC-3CG-173
DGC	PLXND1	1	14.3	3	q22.1	Gain	plexin D1	0.355918	DGC-3CG-047
DGC	PPARGC1A	1	14.3	4	p15.2	Gain	PPARG coactivator 1 alpha	0.355918	DGC-3CG-047
DGC	PPP1R8	1	14.3	1	p35.3	Loss	protein phosphatase 1 regulatory subunit 8	0.355918	DGC-3CG-047
DGC	PRDX1	1	14.3	1	p34.1	Loss	peroxiredoxin 1	0.355918	DGC-3CG-047
DGC	PRKAA1	1	14.3	5	p13.1	Loss	protein kinase AMP-activated catalytic subunit alpha 1	0.355918	DGC-3CG-047
DGC	PRKCE	1	14.3	2	p21	Gain	protein kinase C epsilon	0.355918	DGC-3CG-047
DGC	PRRX2	1	14.3	9	q34.11	Gain	paired related homeobox 2	0.355918	DGC-3CG-173
DGC	PSTPIP1	1	14.3	15	q24.3	Loss	proline-serine-threonine phosphatase interacting protein 1	0.355918	DGC-3CG-047
DGC	PTEN	1	14.3	10	q23.31	Loss	phosphatase and tensin homolog 4 5-trisphosphate 3-phosphatase and dual-specificity protein phosphatase PTEN	0.355918	DGC-3CG-064
DGC	PTP4A2	1	14.3	1	p35.2	Loss	protein tyrosine phosphatase type IVA member 2	0.355918	DGC-3CG-047
DGC	PTPA	1	14.3	9	q34.11	Gain	protein phosphatase 2 phosphatase activator	0.355918	DGC-3CG-173
DGC	PTPN14	1	14.3	1	q41	Gain	protein tyrosine phosphatase non-receptor type 14	0.355918	DGC-8CG-004
DGC	PTX3	1	14.3	3	q25.32	Gain	pentraxin 3	0.355918	DGC-3CG-047
DGC	QKI	1	14.3	6	q26	Gain	QKI KH domain containing RNA binding	0.355918	DGC-3CG-042
DGC	RASA1	1	14.3	5	q14.3	Loss	RAS p21 protein activator 1	0.355918	DGC-3CG-047
DGC	RBFOX3	1	14.3	17	q25.3	Gain	RNA binding protein fox-1 homolog 3	0.355918	DGC-8CG-004
DGC	RBM8A	1	14.3	1	q21.1	Gain	RNA binding motif protein 8A	0.355918	DGC-3CG-173
DGC	RBP2	1	14.3	3	q23	Gain	retinol binding protein 2	0.355918	DGC-3CG-047
DGC	RDX	1	14.3	11	q22.3	Loss	radixin	0.355918	DGC-3CG-047
DGC	RHOC	1	14.3	1	p13.2	Loss	ras homolog family member C	0.355918	DGC-3CG-047
DGC	RNF111	1	14.3	15	q22.1	Loss	ring finger protein 111	0.355918	DGC-3CG-047
DGC	RUNX1	1	14.3	21	q22.12	Gain	runt related transcription factor 1	0.355918	DGC-3CG-035
DGC	SALL1	1	14.3	16	q12.1	Gain	spalt like transcription factor 1	0.355918	DGC-8CG-004
DGC	SALL4	1	14.3	20	q13.2	Gain	spalt like transcription factor 4	0.355918	DGC-3CG-173
DGC	SATB1	1	14.3	3	p24.3	Gain	SATB homeobox 1	0.355918	DGC-3CG-035
DGC	SATB2	1	14.3	2	q33.1	Gain	SATB homeobox 2	0.355918	DGC-3CG-047
DGC	SDC1	1	14.3	2	p24.1	Gain	syndecan 1	0.355918	DGC-1CG-001
DGC	SEMA4A	1	14.3	1	q22	Gain	semaphorin 4A	0.355918	DGC-3CG-173
DGC	SENP1	1	14.3	12	q13.11	Gain	SUMO1/sentrin specific peptidase 1	0.355918	DGC-3CG-047
DGC	SERPINE1	1	14.3	7	q22.1	Loss	serpin family E member 1	0.355918	DGC-3CG-047
DGC	SERPINF1	1	14.3	17	p13.3	Loss	serpin family F member 1	0.355918	DGC-3CG-047
DGC	SETD7	1	14.3	4	q31.1	Loss	SET domain containing lysine methyltransferase 7	0.355918	DGC-3CG-047
DGC	SFTPC	1	14.3	8	p21.3	Gain	surfactant protein C	0.355918	DGC-3CG-035
DGC	SHH	1	14.3	7	q36.3	Gain	sonic hedgehog	0.355918	DGC-3CG-047
DGC	SIX1	1	14.3	14	q23.1	Loss	SIX homeobox 1	0.355918	DGC-3CG-047
DGC	SKI	1	14.3	1	p36.33	Gain	SKI proto-oncogene	0.355918	DGC-8CG-004
DGC	SKIL	1	14.3	3	q26.2	Loss	SKI like proto-oncogene	0.355918	DGC-3CG-047
DGC	SKP1	1	14.3	5	q31.1	Loss	S-phase kinase associated protein 1	0.355918	DGC-3CG-047
DGC	SLIT3	1	14.3	5	q35.1	Gain	slit guidance ligand 3	0.355918	DGC-3CG-035
DGC	SMURF2	1	14.3	17	q24.1	Loss	SMAD specific E3 ubiquitin protein ligase 2	0.355918	DGC-3CG-173
DGC	SOD2	1	14.3	6	q25.3	Loss	superoxide dismutase 2	0.355918	DGC-3CG-047
DGC	SON	1	14.3	21	q22.11	Loss	SON DNA binding protein	0.355918	DGC-3CG-047
DGC	SOX3	1	14.3	X	q27.1	Gain	SRY-box 3	0.355918	DGC-3CG-173
DGC	SOX5	1	14.3	12	p12.1	Gain	SRY-box 5	0.182717	DGC-3CG-047
DGC	SOX9	1	14.3	17	q24.3	Gain	SRY-box 9 gene 9|transcription factor SOX-9	0.355918	DGC-3CG-047
DGC	SPRY2	1	14.3	13	q31.1	Loss	sprouty RTK signaling antagonist 2	0.355918	DGC-3CG-047
DGC	SPZ1	1	14.3	5	q14.1	Loss	spermatogenic leucine zipper 1	0.355918	DGC-3CG-047
DGC	SQSTM1	1	14.3	5	q35.3	Loss	sequestosome 1	0.355918	DGC-3CG-047
DGC	ST8SIA1	1	14.3	12	p12.1	Gain	ST8 alpha-N-acetyl-neuraminide alpha-28-sialyltransferase 1	0.355918	DGC-3CG-047
DGC	STAT1	1	14.3	2	q32.2	Gain	signal transducer and activator of transcription 1	0.355918	DGC-3CG-047
DGC	TAB1	1	14.3	22	q13.1	Loss	TGF-beta activated kinase 1 (MAP3K7) binding protein 1	0.355918	DGC-3CG-047
DGC	TBK1	1	14.3	12	q14.2	Loss	TANK binding kinase 1	0.355918	DGC-3CG-047
DGC	TBX20	1	14.3	7	p14.2	Gain	T-box 20	0.355918	DGC-3CG-047
DGC	TBX3	1	14.3	12	q24.21	Gain	T-box 3	0.355918	DGC-3CG-064
DGC	TCF7	1	14.3	5	q31.1	Loss	transcription factor 7	0.355918	DGC-3CG-047
DGC	TERT	1	14.3	5	p15.33	Gain	telomerase reverse transcriptase	0.355918	DGC-3CG-173
DGC	TFDP3	1	14.3	X	q26.2	Gain	transcription factor Dp family member 3	0.355918	DGC-3CG-173
DGC	TGFA	1	14.3	2	p13.3	Gain	transforming growth factor alpha	0.355918	DGC-3CG-047
DGC	TGFB1	1	14.3	19	q13.2	Loss	transforming growth factor beta 1	0.355918	DGC-3CG-047
DGC	TIAM1	1	14.3	21	q22.11	Loss	T-cell lymphoma invasion and metastasis 1	0.355918	DGC-3CG-047
DGC	TIMELESS	1	14.3	12	q13.3	Loss	timeless circadian clock	0.355918	DGC-3CG-047
DGC	TLE4	1	14.3	9	q21.31	Gain	transducin like enhancer of split 4	0.355918	DGC-3CG-035
DGC	TNC	1	14.3	9	q33.1	Gain	tenascin C	0.355918	DGC-3CG-173
DGC	TNFRSF11A	1	14.3	18	q21.33	Loss	TNF receptor superfamily member 11a	0.355918	DGC-3CG-047
DGC	TNS1	1	14.3	2	q35	Gain	tensin 1	0.355918	DGC-3CG-047
DGC	TP53BP2	1	14.3	1	q41	Gain	tumor protein p53 binding protein 2	0.355918	DGC-8CG-004
DGC	TRIM33	1	14.3	1	p13.2	Loss	tripartite motif containing 33	0.355918	DGC-3CG-047
DGC	TRIM37	1	14.3	17	q22	Loss	tripartite motif containing 37	0.355918	DGC-3CG-047
DGC	TSC1	1	14.3	9	q34.13	Gain	TSC complex subunit 1	0.182717	DGC-3CG-173
DGC	TSC2	1	14.3	16	p13.3	Gain	TSC complex subunit 2	0.355918	DGC-3CG-047
DGC	TUSC7	1	14.3	3	q13.31	Gain	tumor suppressor candidate 7 (non-protein coding)	0.355918	DGC-3CG-047
DGC	TWIST2	1	14.3	2	q37.3	Gain	twist family bHLH transcription factor 2	0.355918	DGC-3CG-047
DGC	TXN	1	14.3	9	q31.3	Loss	thioredoxin	0.355918	DGC-3CG-064
DGC	TXNIP	1	14.3	1	q21.1	Gain	thioredoxin interacting protein 25-dihydroxyvitamin D-3|vitamin D3 up-regulated protein 1	0.355918	DGC-3CG-173
DGC	TYRO3	1	14.3	15	q15.1	Loss	TYRO3 protein tyrosine kinase	0.355918	DGC-3CG-047
DGC	UBR5	1	14.3	8	q22.3	Gain	ubiquitin protein ligase E3 component n-recognin 5	0.182717	DGC-3CG-173
DGC	UHRF2	1	14.3	9	p24.1	Loss	ubiquitin like with PHD and ring finger domains 2	0.355918	DGC-1CG-001
DGC	USP22	1	14.3	17	p11.2	Loss	ubiquitin specific peptidase 22	0.355918	DGC-3CG-047
DGC	USP9X	1	14.3	X	p11.4	Gain	ubiquitin specific peptidase 9 X-linked	0.355918	DGC-3CG-173
DGC	VANGL1	1	14.3	1	p13.1	Loss	VANGL planar cell polarity protein 1	0.355918	DGC-3CG-064
DGC	VDR	1	14.3	12	q13.11	Gain	vitamin D receptor 25-dihydroxyvitamin D3 receptor|nuclear receptor subfamily 1 group I member 1|vitamin D nuclear receptor variant 1|vitamin D3 receptor	0.355918	DGC-3CG-047
DGC	VEGFA	1	14.3	6	p21.1	Gain	vascular endothelial growth factor A	0.355918	DGC-3CG-047
DGC	VGLL4	1	14.3	3	p25.2	Loss	vestigial like family member 4	0.355918	DGC-3CG-047
DGC	VHL	1	14.3	3	p25.3	Loss	von Hippel-Lindau tumor suppressor	0.355918	DGC-3CG-047
DGC	VSNL1	1	14.3	2	p24.2	Gain	visinin like 1	0.355918	DGC-3CG-047
DGC	WNT3A	1	14.3	1	q42.13	Gain	Wnt family member 3A	0.355918	DGC-8CG-004
DGC	WT1	1	14.3	11	p13	Gain	Wilms tumor 1	0.355918	DGC-3CG-064
DGC	XBP1	1	14.3	22	q12.1	Loss	X-box binding protein 1	0.355918	DGC-3CG-047
DGC	YWHAZ	1	14.3	8	q22.3	Gain	tyrosine 3-monooxygenase/tryptophan 5-monooxygenase activation protein zeta delta polypeptide|tyrosine 3/tryptophan 5 -monooxygenase activation protein zeta polypeptide	0.355918	DGC-3CG-173
DGC	ZEB2-AS1	1	14.3	2	q22.3	Gain	ZEB2 antisense RNA 1	0.355918	DGC-3CG-047
DGC	ZFAS1	1	14.3	20	q13.13	Gain	ZNFX1 antisense RNA 1	0.355918	DGC-3CG-173
DGC	ZFYVE9	1	14.3	1	p32.3	Loss	zinc finger FYVE-type containing 9 mothers against decapentaplegic homolog interacting protein receptor activation anchor|MADH-interacting protein|hSARA|mothers against decapentaplegic homolog interacting protein|mothers against decapentaplegic homolog-interacting protein|novel serine protease|receptor activation anchor|smad anchor for receptor activation|zinc finger FYVE domain-containing protei…	0.355918	DGC-3CG-047
DGC	ZNF143	1	14.3	11	p15.4	Loss	zinc finger protein 143	0.355918	DGC-3CG-047
Diffuse gastric cancer (DGC); Copy number alteration (CNA)
The p-value was calculated by a t test between affected DGC versus NAG samples.

## Sheet: EMT-DGC cut off
Table SI. CNA-EMT genes in DGC.
Cancer type	EMT-Gene	Number of patients with alterations	% of occurrence (n= 7)	Chromosome	Gene cytoband	CNA-type	EMT-Gene description	p-value (DGC vs NAG)	ID Patients
DGC	GPC3	7	100	X	q26.2	Gain|Loss	glypican 3	0.355918	DGC-1CG-001|DGC-3CG-035|DGC-3CG-042|DGC-3CG-047|DGC-3CG-064|DGC-3CG-173|DGC-8CG-004
DGC	FLNA	6	85.7	X	q28	Gain	filamin A	0.00096454	DGC-1CG-001|DGC-3CG-035|DGC-3CG-042|DGC-3CG-047|DGC-3CG-064|DGC-3CG-173
DGC	NDRG1	6	85.7	8	q24.22	Gain	N-myc downstream regulated 1	0.00096454	DGC-3CG-173|DGC-1CG-001|DGC-3CG-035|DGC-3CG-042|DGC-3CG-047|DGC-8CG-004
DGC	PROX1	6	85.7	1	q32.3	Gain	prospero homeobox 1	0.00096454	DGC-1CG-001|DGC-3CG-035|DGC-3CG-042|DGC-3CG-047|DGC-3CG-173|DGC-8CG-004
DGC	ALK	5	71.4	2	p23.1	Gain	ALK receptor tyrosine kinase	0.00823735	DGC-1CG-001|DGC-3CG-035|DGC-3CG-042|DGC-3CG-173|DGC-3CG-047
DGC	DDR2	5	71.4	1	q23.3	Gain	discoidin domain receptor tyrosine kinase 2 member 2|discoidin domain-containing receptor 2|discoidin domain-containing receptor tyrosine kinase 2|hydroxyaryl-protein kinase|migration-inducing gene 16 protein|neurotrophic tyrosine kinase receptor related 3|neurotrophic tyrosine kinase receptor-related 3|receptor protein-tyrosine kinase TKT|tyrosine-protein kinase TYRO10|tyrosylprotein kinase	0.00823735	DGC-1CG-001|DGC-3CG-035|DGC-3CG-047|DGC-3CG-173|DGC-8CG-004
DGC	IGF1R	5	71.4	15	q26.3	Gain	insulin like growth factor 1 receptor	0.00823735	DGC-3CG-035|DGC-3CG-042|DGC-3CG-047|DGC-3CG-064|DGC-3CG-173
DGC	IGSF8	5	71.4	1	q23.2	Gain	immunoglobulin superfamily member 8	0.00823735	DGC-3CG-173|DGC-1CG-001|DGC-3CG-035|DGC-3CG-047|DGC-8CG-004
DGC	JAG1	5	71.4	20	p12.2	Gain	jagged 1	0.00823735	DGC-3CG-173|DGC-3CG-035|DGC-3CG-064|DGC-8CG-004|DGC-3CG-047
DGC	MIR205	5	71.4	1	q32.2	Gain	microRNA 205	0.00823735	DGC-1CG-001|DGC-3CG-035|DGC-3CG-047|DGC-3CG-173|DGC-8CG-004
DGC	PTP4A3	5	71.4	8	q24.3	Gain	protein tyrosine phosphatase type IVA member 3	0.00823735	DGC-3CG-035|DGC-3CG-042|DGC-3CG-047|DGC-3CG-173|DGC-8CG-004
DGC	THBD	5	71.4	20	p11.21	Gain	thrombomodulin	0.00823735	DGC-3CG-035|DGC-3CG-042|DGC-8CG-004|DGC-3CG-047|DGC-3CG-173
DGC	TRPS1	5	71.4	8	q23.3	Gain	transcriptional repressor GATA binding 1	0.00823735	DGC-3CG-035|DGC-3CG-042|DGC-3CG-047|DGC-8CG-004|DGC-3CG-173
DGC	AR	4	57.1	X	q12	Gain	androgen receptor	0.317021	DGC-1CG-001|DGC-3CG-047|DGC-3CG-173|DGC-8CG-004
DGC	BMP2	4	57.1	20	p12.3	Gain	bone morphogenetic protein 2	0.0300198	DGC-3CG-047|DGC-3CG-064|DGC-3CG-173|DGC-8CG-004
DGC	CYP7B1	4	57.1	8	q12.3	Gain	cytochrome P450 family 7 subfamily B member 1	0.0300198	DGC-3CG-035|DGC-3CG-047|DGC-8CG-004|DGC-3CG-173
DGC	EGFR	4	57.1	7	p11.2	Gain	epidermal growth factor receptor	0.0300198	DGC-3CG-035|DGC-3CG-042|DGC-3CG-047|DGC-3CG-173
DGC	EP300	4	57.1	22	q13.2	Loss	E1A binding protein p300	0.0300198	DGC-3CG-047|DGC-3CG-035|DGC-3CG-042|DGC-3CG-173
DGC	ETS1	4	57.1	11	q24.3	Gain	ETS proto-oncogene 1 transcription factor	0.0300198	DGC-3CG-035|DGC-3CG-042|DGC-3CG-047|DGC-8CG-004
DGC	FMR1	4	57.1	X	q27.3	Gain	fragile X mental retardation 1	0.626117	DGC-1CG-001|DGC-3CG-035|DGC-3CG-064|DGC-3CG-173
DGC	FOXA2	4	57.1	20	p11.21	Gain	forkhead box A2	0.0300198	DGC-3CG-042|DGC-3CG-064|DGC-3CG-047|DGC-3CG-173
DGC	H19	4	57.1	11	p15.5	Gain	H19 imprinted maternally expressed transcript (non-protein coding)	0.0300198	DGC-3CG-035|DGC-3CG-042|DGC-3CG-047|DGC-8CG-004
DGC	KLF6	4	57.1	10	p15.2	Gain	Kruppel like factor 6	0.0300198	DGC-3CG-035|DGC-3CG-047|DGC-3CG-064|DGC-3CG-173
DGC	LINC00261	4	57.1	20	p11.21	Gain	long intergenic non-protein coding RNA 261	0.0300198	DGC-3CG-042|DGC-3CG-064|DGC-3CG-047|DGC-3CG-173
DGC	MIR181A1	4	57.1	1	q32.1	Gain	microRNA 181a-1	0.0300198	DGC-1CG-001|DGC-3CG-035|DGC-3CG-047|DGC-8CG-004
DGC	MIR181B1	4	57.1	1	q32.1	Gain	microRNA 181b-1	0.0300198	DGC-1CG-001|DGC-3CG-035|DGC-3CG-047|DGC-8CG-004
DGC	MIR675	4	57.1	11	p15.5	Gain	microRNA 675	0.0300198	DGC-3CG-035|DGC-3CG-042|DGC-3CG-047|DGC-8CG-004
DGC	MIR92B	4	57.1	1	q22	Gain	microRNA 92b	0.0300198	DGC-3CG-035|DGC-3CG-047|DGC-3CG-173|DGC-8CG-004
DGC	MUC1	4	57.1	1	q22	Gain	mucin 1 cell surface associated transmembrane|mucin-1|peanut-reactive urinary mucin|polymorphic epithelial mucin|tumor associated epithelial mucin|tumor-associated epithelial membrane antigen|tumor-associated mucin	0.0300198	DGC-3CG-035|DGC-3CG-047|DGC-3CG-173|DGC-8CG-004
DGC	NTRK2	4	57.1	9	q21.33	Gain	neurotrophic receptor tyrosine kinase 2	0.0300198	DGC-3CG-035|DGC-3CG-042|DGC-3CG-047|DGC-3CG-173
DGC	NTRK3	4	57.1	15	q25.3	Gain	neurotrophic receptor tyrosine kinase 3	0.0300198	DGC-3CG-035|DGC-3CG-042|DGC-3CG-047|DGC-3CG-173
DGC	NUMB	4	57.1	14	q24.3	Loss	NUMB endocytic adaptor protein	0.0300198	DGC-3CG-035|DGC-3CG-047|DGC-1CG-001|DGC-3CG-173
DGC	PARD3	4	57.1	10	p11.21	Gain|Loss	par-3 family cell polarity regulator	0.00871582	DGC-3CG-064|DGC-1CG-001|DGC-3CG-035|DGC-3CG-047
DGC	PCDH9	4	57.1	13	q21.32	Gain	protocadherin 9	0.317021	DGC-3CG-035|DGC-3CG-047|DGC-3CG-173|DGC-1CG-001
DGC	PCMT1	4	57.1	6	q25.1	Loss	protein-L-isoaspartate (D-aspartate) O-methyltransferase	0.0300198	DGC-3CG-035|DGC-3CG-042|DGC-3CG-047|DGC-3CG-173
DGC	SHC1	4	57.1	1	q21.3	Gain	SHC adaptor protein 1	0.0300198	DGC-3CG-035|DGC-3CG-047|DGC-3CG-173|DGC-8CG-004
DGC	SNAI2	4	57.1	8	q11.21	Gain	snail family transcriptional repressor 2 zinc finger protein|zinc finger protein SNAI2	0.0300198	DGC-3CG-035|DGC-3CG-047|DGC-3CG-173|DGC-8CG-004
DGC	SPRR2A	4	57.1	1	q21.3	Gain	small proline rich protein 2A	0.0300198	DGC-1CG-001|DGC-3CG-047|DGC-3CG-173|DGC-8CG-004
DGC	TAZ	4	57.1	X	q28	Gain	tafazzin	0.0300198	DGC-1CG-001|DGC-3CG-035|DGC-3CG-047|DGC-3CG-173
DGC	TET1	4	57.1	10	q21.3	Loss	tet methylcytosine dioxygenase 1	0.0300198	DGC-3CG-035|DGC-3CG-042|DGC-3CG-173|DGC-3CG-047
DGC	ABCG2	3	42.9	4	q22.1	Loss	ATP binding cassette subfamily G member 2 (Junior blood group)	0.0781407	DGC-3CG-035|DGC-3CG-047|DGC-3CG-173
DGC	CDH1	3	42.9	16	q22.1	Loss	cadherin 1 E-cadherin (epithelial)|cadherin-1|calcium-dependent adhesion protein epithelial|cell-CAM 120/80|epithelial cadherin|uvomorulin	0.0781407	DGC-3CG-035|DGC-3CG-047|DGC-3CG-173
DGC	CDH13	3	42.9	16	q23.3	Gain	cadherin 13	0.0417497	DGC-3CG-035|DGC-3CG-064|DGC-8CG-004
DGC	CLK2	3	42.9	1	q22	Gain	CDC like kinase 2	0.0781407	DGC-3CG-035|DGC-3CG-173|DGC-8CG-004
DGC	CRIM1	3	42.9	2	p22.2	Gain	cysteine rich transmembrane BMP regulator 1	0.0781407	DGC-3CG-035|DGC-1CG-001|DGC-3CG-047
DGC	CRP	3	42.9	1	q23.2	Gain	C-reactive protein	0.0781407	DGC-8CG-004|DGC-3CG-173|DGC-3CG-047
DGC	CXCL12	3	42.9	10	q11.21	Gain	C-X-C motif chemokine ligand 12	0.0781407	DGC-1CG-001|DGC-3CG-035|DGC-3CG-047
DGC	DAB2IP	3	42.9	9	q33.2	Gain	DAB2 interacting protein	0.0781407	DGC-3CG-035|DGC-3CG-047|DGC-3CG-173
DGC	EEF1D	3	42.9	8	q24.3	Gain	eukaryotic translation elongation factor 1 delta	0.0781407	DGC-3CG-047|DGC-3CG-173|DGC-8CG-004
DGC	EFNB2	3	42.9	13	q33.3	Gain	ephrin B2	0.0781407	DGC-3CG-035|DGC-3CG-173|DGC-3CG-047
DGC	EIF4E	3	42.9	4	q23	Loss	eukaryotic translation initiation factor 4E	0.0781407	DGC-1CG-001|DGC-3CG-047|DGC-3CG-173
DGC	ELK1	3	42.9	X	p11.23	Gain	ELK1 ETS transcription factor	0.0781407	DGC-3CG-035|DGC-3CG-047|DGC-3CG-173
DGC	ESR2	3	42.9	14	q23.3	Loss	estrogen receptor 2	0.0781407	DGC-1CG-001|DGC-3CG-047|DGC-3CG-173
DGC	GATA1	3	42.9	X	p11.23	Gain	GATA binding protein 1	0.0781407	DGC-3CG-035|DGC-3CG-047|DGC-3CG-173
DGC	GEMIN2	3	42.9	14	q21.1	Loss	gem nuclear organelle associated protein 2	0.0781407	DGC-1CG-001|DGC-3CG-035|DGC-3CG-047
DGC	GLI2	3	42.9	2	q14.2	Gain	GLI family zinc finger 2	0.0781407	DGC-3CG-035|DGC-3CG-047|DGC-3CG-173
DGC	GRIN1	3	42.9	9	q34.3	Gain	glutamate ionotropic receptor NMDA type subunit 1 subunit zeta-1|N-methyl-D-aspartate receptor subunit NR1|NMD-R1|glutamate [NMDA] receptor subunit zeta 1|glutamate [NMDA] receptor subunit zeta-1	0.0781407	DGC-3CG-035|DGC-3CG-047|DGC-3CG-173
DGC	HAVCR2	3	42.9	5	q33.3	Loss	hepatitis A virus cellular receptor 2	0.0781407	DGC-3CG-035|DGC-3CG-047|DGC-3CG-173
DGC	HDAC6	3	42.9	X	p11.23	Gain	histone deacetylase 6	0.0781407	DGC-3CG-035|DGC-3CG-047|DGC-3CG-173
DGC	HOTAIR	3	42.9	12	q13.13	Gain	HOX transcript antisense RNA	0.0781407	DGC-3CG-035|DGC-3CG-042|DGC-3CG-173
DGC	HOXA10	3	42.9	7	p15.2	Gain	homeobox A10	0.0781407	DGC-3CG-035|DGC-3CG-047|DGC-3CG-173
DGC	HOXA13	3	42.9	7	p15.2	Gain	homeobox A13	0.0781407	DGC-3CG-035|DGC-3CG-047|DGC-3CG-173
DGC	HOXA9	3	42.9	7	p15.2	Gain	homeobox A9	0.0781407	DGC-3CG-035|DGC-3CG-047|DGC-3CG-173
DGC	HS6ST2	3	42.9	X	q26.2	Gain	heparan sulfate 6-O-sulfotransferase 2	0.0781407	DGC-1CG-001|DGC-3CG-047|DGC-3CG-173
DGC	IRF6	3	42.9	1	q32.2	Gain	interferon regulatory factor 6	0.0781407	DGC-1CG-001|DGC-3CG-035|DGC-8CG-004
DGC	IRS2	3	42.9	13	q34	Gain	insulin receptor substrate 2	0.0781407	DGC-3CG-035|DGC-3CG-173|DGC-3CG-047
DGC	LATS1	3	42.9	6	q25.1	Loss	large tumor suppressor kinase 1 Drosophila) homolog 1|WARTS protein kinase|h-warts|large tumor suppressor homolog 1|serine/threonine-protein kinase LATS1	0.0781407	DGC-3CG-035|DGC-3CG-047|DGC-3CG-173
DGC	MEF2D	3	42.9	1	q22	Gain	myocyte enhancer factor 2D	0.0781407	DGC-3CG-047|DGC-3CG-173|DGC-8CG-004
DGC	MIR124-3	3	42.9	20	q13.33	Gain	microRNA 124-3	0.0781407	DGC-3CG-173|DGC-3CG-047|DGC-8CG-004
DGC	MIR196B	3	42.9	7	p15.2	Gain	microRNA 196b	0.0781407	DGC-3CG-035|DGC-3CG-047|DGC-3CG-173
DGC	MIR199A2	3	42.9	1	q24.3	Gain	microRNA 199a-2	0.0781407	DGC-3CG-047|DGC-3CG-173|DGC-8CG-004
DGC	MIR21	3	42.9	17	q23.1	Loss	microRNA 21	0.0781407	DGC-3CG-035|DGC-3CG-047|DGC-3CG-173
DGC	MIR214	3	42.9	1	q24.3	Gain	microRNA 214	0.0781407	DGC-3CG-047|DGC-3CG-173|DGC-8CG-004
DGC	MIR224	3	42.9	X	q28	Gain	microRNA 224	0.0781407	DGC-1CG-001|DGC-3CG-047|DGC-3CG-173
DGC	MIR302A	3	42.9	4	q25	Loss	microRNA 302a	0.0781407	DGC-1CG-001|DGC-3CG-047|DGC-3CG-173
DGC	MIR30B	3	42.9	8	q24.22	Gain	microRNA 30b	0.0781407	DGC-3CG-173|DGC-3CG-035|DGC-3CG-047
DGC	MIR30D	3	42.9	8	q24.22	Gain	microRNA 30d	0.0781407	DGC-3CG-173|DGC-3CG-035|DGC-3CG-047
DGC	MIR452	3	42.9	X	q28	Gain	microRNA 452	0.0781407	DGC-1CG-001|DGC-3CG-047|DGC-3CG-173
DGC	MIR9-1	3	42.9	1	q22	Gain	microRNA 9-1	0.0781407	DGC-3CG-047|DGC-3CG-173|DGC-8CG-004
DGC	MKL1	3	42.9	22	q13.2	Loss	megakaryoblastic leukemia (translocation) 1 SAP and coiled-coil domain|megakaryoblastic leukemia 1 protein|megakaryocytic acute leukemia protein|myocardin-related transcription factor A	0.0781407	DGC-3CG-042|DGC-3CG-047|DGC-3CG-173
DGC	NME1	3	42.9	17	q21.33	Loss	NME/NM23 nucleoside diphosphate kinase 1	0.0781407	DGC-3CG-035|DGC-3CG-047|DGC-3CG-173
DGC	NOTCH1	3	42.9	9	q34.3	Gain|Loss	notch 1 translocation-associated|neurogenic locus notch homolog protein 1|translocation-associated notch protein TAN-1	0.0781407	DGC-1CG-001|DGC-3CG-035|DGC-3CG-173
DGC	NRP2	3	42.9	2	q33.3	Gain	neuropilin 2	0.0781407	DGC-3CG-035|DGC-3CG-047|DGC-3CG-173
DGC	OCLN	3	42.9	5	q13.2	Loss	occludin	0.0781407	DGC-3CG-047|DGC-3CG-035|DGC-3CG-173
DGC	PAG1	3	42.9	8	q21.13	Gain	phosphoprotein membrane anchor with glycosphingolipid microdomains 1	0.0781407	DGC-3CG-035|DGC-3CG-047|DGC-3CG-173
DGC	PAK5	3	42.9	20	p12.2	Gain	p21 (RAC1) activated kinase 5	0.0781407	DGC-8CG-004|DGC-3CG-047|DGC-3CG-173
DGC	PBXIP1	3	42.9	1	q21.3	Gain	PBX homeobox interacting protein 1	0.0781407	DGC-3CG-047|DGC-3CG-173|DGC-8CG-004
DGC	PLA2G4A	3	42.9	1	q31.1	Gain	phospholipase A2 group IVA	0.0781407	DGC-3CG-035|DGC-3CG-047|DGC-3CG-173
DGC	PLAC8	3	42.9	4	q21.22	Loss	placenta specific 8	0.0781407	DGC-1CG-001|DGC-3CG-173|DGC-3CG-047
DGC	PPM1D	3	42.9	17	q23.2	Loss	protein phosphatase Mg2+/Mn2+ dependent 1D	0.0781407	DGC-3CG-035|DGC-3CG-047|DGC-3CG-173
DGC	PRRX1	3	42.9	1	q24.2	Gain	paired related homeobox 1	0.0781407	DGC-3CG-047|DGC-3CG-173|DGC-8CG-004
DGC	PTPN11	3	42.9	12	q24.13	Gain|Loss	protein tyrosine phosphatase non-receptor type 11	0.0781407	DGC-3CG-047|DGC-3CG-064|DGC-3CG-035
DGC	RAC1	3	42.9	7	p22.1	Loss	ras-related C3 botulinum toxin substrate 1 (rho family small GTP binding protein Rac1)	0.273123	DGC-3CG-035|DGC-3CG-042|DGC-3CG-047
DGC	RAF1	3	42.9	3	p25.2	Loss	Raf-1 proto-oncogene serine/threonine kinase	0.0781407	DGC-3CG-035|DGC-3CG-047|DGC-3CG-173
DGC	RASAL2	3	42.9	1	q25.2	Gain	RAS protein activator like 2	0.0781407	DGC-3CG-047|DGC-3CG-173|DGC-8CG-004
DGC	RHOA	3	42.9	3	p21.31	Loss	ras homolog family member A	0.0781407	DGC-1CG-001|DGC-3CG-035|DGC-3CG-047
DGC	RMST	3	42.9	12	q23.1	Gain	rhabdomyosarcoma 2 associated transcript (non-protein coding)	0.0417497	DGC-3CG-035|DGC-3CG-042|DGC-3CG-064
DGC	ROCK1	3	42.9	18	q11.1	Loss	Rho associated coiled-coil containing protein kinase 1 coiled-coil-containing protein kinase 1|rho-associated coiled-coil-containing protein kinase I	0.273123	DGC-1CG-001|DGC-3CG-035|DGC-3CG-042
DGC	RPS6KB1	3	42.9	17	q23.1	Loss	ribosomal protein S6 kinase B1	0.0781407	DGC-3CG-035|DGC-3CG-047|DGC-3CG-173
DGC	S100A8	3	42.9	1	q21.3	Gain	S100 calcium binding protein A8	0.0781407	DGC-3CG-047|DGC-3CG-173|DGC-8CG-004
DGC	S100A9	3	42.9	1	q21.3	Gain	S100 calcium binding protein A9	0.0781407	DGC-3CG-047|DGC-3CG-173|DGC-8CG-004
DGC	SIRT1	3	42.9	10	q21.3	Loss	sirtuin 1	0.0781407	DGC-3CG-035|DGC-3CG-047|DGC-3CG-173
DGC	SNW1	3	42.9	14	q24.3	Loss	SNW domain containing 1 62-kD	0.0781407	DGC-1CG-001|DGC-3CG-035|DGC-3CG-047
DGC	TEAD1	3	42.9	11	p15.3	Gain	TEA domain transcription factor 1	0.0781407	DGC-3CG-035|DGC-3CG-042|DGC-3CG-047
DGC	TGFBR1	3	42.9	9	q22.33	Gain	transforming growth factor beta receptor 1 53kD|activin A receptor type II-like kinase 53kDa|activin A receptor type II-like protein kinase of 53kD|activin receptor-like kinase 5|serine/threonine-protein kinase receptor R4|tbetaR-I|transforming growth factor beta receptor I|transforming growth factor beta receptor I (activin A receptor type II-like kinase 53kD)|transforming growth factor-beta rec…	0.0781407	DGC-3CG-035|DGC-3CG-047|DGC-3CG-173
DGC	TLR4	3	42.9	9	q33.1	Gain	toll like receptor 4	0.0781407	DGC-3CG-035|DGC-3CG-047|DGC-3CG-173
DGC	TM4SF5	3	42.9	17	p13.2	Loss	transmembrane 4 L six family member 5	0.0781407	DGC-1CG-001|DGC-3CG-047|DGC-3CG-173
DGC	TP63	3	42.9	3	q28	Gain|Loss	tumor protein p63	0.0110667	DGC-3CG-042|DGC-3CG-047|DGC-3CG-173
DGC	TRPM8	3	42.9	2	q37.1	Gain|Loss	transient receptor potential cation channel subfamily M member 8	0.0417497	DGC-3CG-047|DGC-1CG-001|DGC-8CG-004
DGC	TXN2	3	42.9	22	q12.3	Loss	thioredoxin 2	0.0781407	DGC-3CG-035|DGC-3CG-047|DGC-3CG-173
DGC	WWOX	3	42.9	16	q23.1	Gain|Loss	WW domain containing oxidoreductase	0.273123	DGC-3CG-064|DGC-8CG-004|DGC-3CG-042
DGC	ZEB2	3	42.9	2	q22.3	Gain	zinc finger E-box binding homeobox 2	0.0781407	DGC-3CG-035|DGC-3CG-047|DGC-1CG-001
Diffuse gastric cancer (DGC); Copy number alteration (CNA)
The p-value was calculated by a t test between affected DGC versus NAG samples.

## Sheet: EMT-IGC
Table S1. CNA-EMT genes in IGC.
Cancer type	EMT-Gene	Number of patients with alteration	% of occurrence (n= 7)	Chromosome	Gene cytoband	CNA-types	EMT-Gene description	p-value (IGC vs NAG)	ID Patients
IGC	GPC3	7	100	X	q26.2	Gain|Loss	glypican 3	0.355918	IGC-3CG-128|IGC-3CG-008|IGC-3CG-099|IGC-3CG-104|IGC-3CG-126|IGC-3CG-146|IGC-3CG-046
IGC	WWOX	6	85.7	16	q23.1	Gain|Loss	WW domain containing oxidoreductase	0.00410441	IGC-3CG-046|IGC-3CG-104|IGC-3CG-099|IGC-3CG-126|IGC-3CG-146|IGC-3CG-128
IGC	NF1	5	71.4	17	q11.2	Gain|Loss	neurofibromin 1	1	IGC-3CG-104|IGC-3CG-099|IGC-3CG-126|IGC-3CG-146|IGC-3CG-046
IGC	CDH13	4	57.1	16	q23.3	Gain|Loss	cadherin 13	0.111685	IGC-3CG-046|IGC-3CG-104|IGC-3CG-099|IGC-3CG-146
IGC	ETS1	4	57.1	11	q24.3	Gain|Loss	ETS proto-oncogene 1 transcription factor	0.0300198	IGC-3CG-046|IGC-3CG-104|IGC-3CG-126|IGC-3CG-128
IGC	MSI2	4	57.1	17	q22	Gain|Loss	musashi RNA binding protein 2	0.0300198	IGC-3CG-046|IGC-3CG-128|IGC-3CG-104|IGC-3CG-008
IGC	PTK2	4	57.1	8	q24.3	Gain|Loss	protein tyrosine kinase 2	0.0300198	IGC-3CG-104|IGC-3CG-128|IGC-3CG-146|IGC-3CG-046
IGC	TRPS1	4	57.1	8	q23.3	Gain|Loss	transcriptional repressor GATA binding 1	0.0300198	IGC-3CG-046|IGC-3CG-104|IGC-3CG-128|IGC-3CG-146
IGC	ZEB2	4	57.1	2	q22.3	Gain|Loss	zinc finger E-box binding homeobox 2	0.0300198	IGC-3CG-046|IGC-3CG-104|IGC-3CG-128|IGC-3CG-099
IGC	ALK	3	42.9	2	p23.1	Gain|Loss	ALK receptor tyrosine kinase	0.0781407	IGC-3CG-046|IGC-3CG-104|IGC-3CG-146
IGC	AGO2	3	42.9	8	q24.3	Gain|Loss	argonaute 2 RISC catalytic component	0.0781407	IGC-3CG-104|IGC-3CG-146|IGC-3CG-046
IGC	ATXN1	3	42.9	6	p22.3	Gain|Loss	ataxin 1	0.273123	IGC-3CG-104|IGC-3CG-099|IGC-3CG-126
IGC	CDK3	3	42.9	17	q25.1	Gain|Loss	cyclin dependent kinase 3	0.0781407	IGC-3CG-104|IGC-3CG-046|IGC-3CG-128
IGC	CRIM1	3	42.9	2	p22.2	Gain|Loss	cysteine rich transmembrane BMP regulator 1	0.0781407	IGC-3CG-046|IGC-3CG-104|IGC-3CG-128
IGC	DAB2IP	3	42.9	9	q33.2	Gain	DAB2 interacting protein	0.0781407	IGC-3CG-046|IGC-3CG-128|IGC-3CG-104
IGC	EP300	3	42.9	22	q13.2	Gain|Loss	E1A binding protein p300	0.0781407	IGC-3CG-104|IGC-3CG-046|IGC-3CG-128
IGC	EGFR	3	42.9	7	p11.2	Gain|Loss	epidermal growth factor receptor	0.0781407	IGC-3CG-046|IGC-3CG-104|IGC-3CG-128
IGC	EEF1D	3	42.9	8	q24.3	Gain	eukaryotic translation elongation factor 1 delta	0.0781407	IGC-3CG-104|IGC-3CG-128|IGC-3CG-146
IGC	FMR1	3	42.9	X	q27.3	Gain|Loss	fragile X mental retardation 1	1	IGC-3CG-128|IGC-3CG-099|IGC-3CG-104
IGC	GLI2	3	42.9	2	q14.2	Gain|Loss	GLI family zinc finger 2	0.0781407	IGC-3CG-046|IGC-3CG-128|IGC-3CG-104
IGC	GRHL2	3	42.9	8	q22.3	Gain	grainyhead like transcription factor 2	0.611091	IGC-3CG-104|IGC-3CG-128|IGC-3CG-146
IGC	H19	3	42.9	11	p15.5	Gain|Loss	H19 imprinted maternally expressed transcript (non-protein coding)	0.0781407	IGC-3CG-046|IGC-3CG-128|IGC-3CG-104
IGC	HSP90AA1	3	42.9	14	q32.31	Gain|Loss	heat shock protein 90 alpha family class A member 1	0.0781407	IGC-3CG-104|IGC-3CG-046|IGC-3CG-128
IGC	HDAC4	3	42.9	2	q37.3	Gain|Loss	histone deacetylase 4	0.0781407	IGC-3CG-046|IGC-3CG-128|IGC-3CG-104
IGC	HOXA10	3	42.9	7	p15.2	Gain	homeobox A10	0.0781407	IGC-3CG-104|IGC-3CG-126|IGC-3CG-128
IGC	HOXA9	3	42.9	7	p15.2	Gain	homeobox A9	0.0781407	IGC-3CG-104|IGC-3CG-126|IGC-3CG-128
IGC	HIP1	3	42.9	7	q11.23	Gain|Loss	huntingtin interacting protein 1	0.0781407	IGC-3CG-104|IGC-3CG-046|IGC-3CG-128
IGC	KLF5	3	42.9	13	q22.1	Gain|Loss	Kruppel like factor 5	0.0781407	IGC-3CG-104|IGC-3CG-146|IGC-3CG-046
IGC	KLF6	3	42.9	10	p15.2	Gain	Kruppel like factor 6	0.0781407	IGC-3CG-046|IGC-3CG-104|IGC-3CG-128
IGC	KLF8	3	42.9	X	p11.21	Gain|Loss	Kruppel like factor 8	0.0781407	IGC-3CG-104|IGC-3CG-046|IGC-3CG-128
IGC	LYN	3	42.9	8	q12.1	Gain|Loss	LYN proto-oncogene Src family tyrosine kinase	0.0781407	IGC-3CG-104|IGC-3CG-146|IGC-3CG-046
IGC	MITF	3	42.9	3	p13	Gain|Loss	melanogenesis associated transcription factor	0.0781407	IGC-3CG-046|IGC-3CG-128|IGC-3CG-104
IGC	MIR196B	3	42.9	7	p15.2	Gain	microRNA 196b	0.0781407	IGC-3CG-104|IGC-3CG-126|IGC-3CG-128
IGC	MIR675	3	42.9	11	p15.5	Gain	microRNA 675	0.0781407	IGC-3CG-046|IGC-3CG-128|IGC-3CG-104
IGC	MICAL2	3	42.9	11	p15.3	Gain	microtubule associated monooxygenase calponin and LIM domain containing 2	0.0781407	IGC-3CG-046|IGC-3CG-128|IGC-3CG-104
IGC	MTUS1	3	42.9	8	p22	Gain|Loss	microtubule associated scaffold protein 1	0.0781407	IGC-3CG-128|IGC-3CG-146|IGC-3CG-104
IGC	MSN	3	42.9	X	q12	Gain|Loss	moesin	0.0781407	IGC-3CG-128|IGC-3CG-104|IGC-3CG-126
IGC	MYC	3	42.9	8	q24.21	Gain	MYC proto-oncogene bHLH transcription factor	0.0781407	IGC-3CG-104|IGC-3CG-128|IGC-3CG-146
IGC	NRP2	3	42.9	2	q33.3	Gain|Loss	neuropilin 2	0.0781407	IGC-3CG-046|IGC-3CG-104|IGC-3CG-128
IGC	NTRK2	3	42.9	9	q21.33	Gain	neurotrophic receptor tyrosine kinase 2	0.0781407	IGC-3CG-046|IGC-3CG-128|IGC-3CG-104
IGC	NTRK3	3	42.9	15	q25.3	Gain|Loss	neurotrophic receptor tyrosine kinase 3	0.0781407	IGC-3CG-046|IGC-3CG-099|IGC-3CG-104
IGC	NDRG1	3	42.9	8	q24.22	Gain	N-myc downstream regulated 1	0.0781407	IGC-3CG-104|IGC-3CG-128|IGC-3CG-146
IGC	NOTCH2	3	42.9	1	p12	Gain	notch 2	0.0781407	IGC-3CG-104|IGC-3CG-046|IGC-3CG-128
IGC	NCOA3	3	42.9	20	q13.12	Gain|Loss	nuclear receptor coactivator 3	0.0781407	IGC-3CG-104|IGC-3CG-046|IGC-3CG-128
IGC	NR5A2	3	42.9	1	q32.1	Gain|Loss	nuclear receptor subfamily 5 group A member 2	0.0781407	IGC-3CG-104|IGC-3CG-046|IGC-3CG-128
IGC	NUMB	3	42.9	14	q24.3	Gain|Loss	NUMB endocytic adaptor protein	0.0781407	IGC-3CG-046|IGC-3CG-128|IGC-3CG-104
IGC	OCLN	3	42.9	5	q13.2	Gain|Loss	occludin	0.0781407	IGC-3CG-046|IGC-3CG-104|IGC-3CG-128
IGC	PARD3	3	42.9	10	p11.21	Gain|Loss	par-3 family cell polarity regulator	0.611091	IGC-3CG-104|IGC-3CG-046|IGC-3CG-128
IGC	PIK3CA	3	42.9	3	q26.32	Gain	phosphatidylinositol-45-bisphosphate 3-kinase catalytic subunit alpha	0.273123	IGC-3CG-099|IGC-3CG-126|IGC-3CG-146
IGC	PIK3R1	3	42.9	5	q13.1	Gain	phosphoinositide-3-kinase regulatory subunit 1	0.0781407	IGC-3CG-046|IGC-3CG-128|IGC-3CG-126
IGC	PAG1	3	42.9	8	q21.13	Gain	phosphoprotein membrane anchor with glycosphingolipid microdomains 1	0.0781407	IGC-3CG-104|IGC-3CG-128|IGC-3CG-146
IGC	PTPN11	3	42.9	12	q24.13	Gain|Loss	protein tyrosine phosphatase non-receptor type 11	0.0781407	IGC-3CG-104|IGC-3CG-046|IGC-3CG-128
IGC	PTP4A3	3	42.9	8	q24.3	Gain	protein tyrosine phosphatase type IVA member 3	0.0781407	IGC-3CG-046|IGC-3CG-104|IGC-3CG-128
IGC	PCDH9	3	42.9	13	q21.32	Gain|Loss	protocadherin 9	0.611091	IGC-3CG-099|IGC-3CG-104|IGC-3CG-146
IGC	ROR1	3	42.9	1	p31.3	Gain|Loss	receptor tyrosine kinase like orphan receptor 1	0.0781407	IGC-3CG-046|IGC-3CG-128|IGC-3CG-104
IGC	SATB2	3	42.9	2	q33.1	Gain|Loss	SATB homeobox 2	0.0781407	IGC-3CG-046|IGC-3CG-128|IGC-3CG-104
IGC	SCRIB	3	42.9	8	q24.3	Gain	scribbled planar cell polarity protein	0.0781407	IGC-3CG-104|IGC-3CG-128|IGC-3CG-146
IGC	SNW1	3	42.9	14	q24.3	Gain|Loss	SNW domain containing 1	0.0781407	IGC-3CG-104|IGC-3CG-046|IGC-3CG-128
IGC	SPOCK1	3	42.9	5	q31.2	Gain|Loss	SPARC/osteonectin cwcv and kazal like domains proteoglycan 1	0.0781407	IGC-3CG-046|IGC-3CG-128|IGC-3CG-104
IGC	TEAD1	3	42.9	11	p15.3	Gain	TEA domain transcription factor 1	0.0781407	IGC-3CG-104|IGC-3CG-046|IGC-3CG-128
IGC	TET1	3	42.9	10	q21.3	Gain|Loss	tet methylcytosine dioxygenase 1	0.0781407	IGC-3CG-104|IGC-3CG-046|IGC-3CG-128
IGC	TCF4	3	42.9	18	q21.2	Gain|Loss	transcription factor 4	0.0781407	IGC-3CG-046|IGC-3CG-104|IGC-3CG-128
IGC	TSC1	3	42.9	9	q34.13	Gain|Loss	TSC complex subunit 1	0.273123	IGC-3CG-104|IGC-3CG-099|IGC-3CG-126
IGC	TP63	3	42.9	3	q28	Gain|Loss	tumor protein p63	1	IGC-3CG-104|IGC-3CG-099|IGC-3CG-146
IGC	USP9X	3	42.9	X	p11.4	Gain|Loss	ubiquitin specific peptidase 9 X-linked	0.0781407	IGC-3CG-128|IGC-3CG-104|IGC-3CG-046
IGC	VEGFA	3	42.9	6	p21.1	Gain	vascular endothelial growth factor A	0.0781407	IGC-3CG-046|IGC-3CG-104|IGC-3CG-128
IGC	ACTL6A	2	28.6	3	q26.33	Gain|Loss	actin like 6A	0.172308	IGC-3CG-104|IGC-3CG-046
IGC	ADAM12	2	28.6	10	q26.2	Gain|Loss	ADAM metallopeptidase domain 12	0.172308	IGC-3CG-046|IGC-3CG-104
IGC	ALX4	2	28.6	11	p11.2	Loss	ALX homeobox 4	0.172308	IGC-3CG-104|IGC-3CG-126
IGC	AR	2	28.6	X	q12	Gain|Loss	androgen receptor	1	IGC-3CG-128|IGC-3CG-104
IGC	ABCB1	2	28.6	7	q21.12	Gain|Loss	ATP binding cassette subfamily B member 1	0.172308	IGC-3CG-128|IGC-3CG-104
IGC	ABCG2	2	28.6	4	q22.1	Loss	ATP binding cassette subfamily G member 2 (Junior blood group)	0.172308	IGC-3CG-046|IGC-3CG-128
IGC	BCL6	2	28.6	3	q27.3	Gain	B-cell CLL/lymphoma 6	0.172308	IGC-3CG-128|IGC-3CG-104
IGC	BCL2	2	28.6	18	q21.33	Gain|Loss	BCL2 apoptosis regulator	0.172308	IGC-3CG-128|IGC-3CG-104
IGC	BOP1	2	28.6	8	q24.3	Gain	block of proliferation 1	0.172308	IGC-3CG-104|IGC-3CG-128
IGC	BMP7	2	28.6	20	q13.31	Gain	bone morphogenetic protein 7	0.172308	IGC-3CG-046|IGC-3CG-128
IGC	BRCA1	2	28.6	17	q21.31	Gain|Loss	BRCA1 DNA repair associated	0.172308	IGC-3CG-104|IGC-3CG-046
IGC	CAMK1D	2	28.6	10	p13	Gain|Loss	calcium/calmodulin dependent protein kinase ID	0.172308	IGC-3CG-104|IGC-3CG-046
IGC	CTNNB1	2	28.6	3	p22.1	Gain|Loss	catenin beta 1	0.172308	IGC-3CG-104|IGC-3CG-128
IGC	CD24	2	28.6	Y	q21	Gain	CD24 molecule	0.172308	IGC-3CG-128|IGC-3CG-104
IGC	CERS6	2	28.6	2	q24.3	Gain|Loss	ceramide synthase 6	0.172308	IGC-3CG-046|IGC-3CG-104
IGC	CLU	2	28.6	8	p21.1	Gain	clusterin	0.172308	IGC-3CG-104|IGC-3CG-128
IGC	F2	2	28.6	11	p11.2	Gain|Loss	coagulation factor II thrombin	0.172308	IGC-3CG-104|IGC-3CG-046
IGC	CTHRC1	2	28.6	8	q22.3	Gain	collagen triple helix repeat containing 1	0.172308	IGC-3CG-128|IGC-3CG-146
IGC	CNTN1	2	28.6	12	q12	Gain|Loss	contactin 1	0.172308	IGC-3CG-104|IGC-3CG-099
IGC	CREBBP	2	28.6	16	p13.3	Gain|Loss	CREB binding protein	0.172308	IGC-3CG-104|IGC-3CG-046
IGC	CUX1	2	28.6	7	q22.1	Gain|Loss	cut like homeobox 1	0.172308	IGC-3CG-104|IGC-3CG-046
IGC	CDK14	2	28.6	7	q21.13	Gain|Loss	cyclin dependent kinase 14	0.172308	IGC-3CG-104|IGC-3CG-128
IGC	CFTR	2	28.6	7	q31.2	Gain|Loss	cystic fibrosis transmembrane conductance regulator	0.172308	IGC-3CG-104|IGC-3CG-128
IGC	DKK3	2	28.6	11	p15.3	Gain	dickkopf WNT signaling pathway inhibitor 3	0.172308	IGC-3CG-046|IGC-3CG-128
IGC	EHD2	2	28.6	19	q13.33	Gain|Loss	EH domain containing 2	0.172308	IGC-3CG-104|IGC-3CG-046
IGC	ELK1	2	28.6	X	p11.23	Gain|Loss	ELK1 ETS transcription factor	0.172308	IGC-3CG-104|IGC-3CG-128
IGC	ELK3	2	28.6	12	q23.1	Gain|Loss	ELK3 ETS transcription factor	0.172308	IGC-3CG-104|IGC-3CG-046
IGC	EPAS1	2	28.6	2	p21	Gain	endothelial PAS domain protein 1	0.172308	IGC-3CG-128|IGC-3CG-104
IGC	ENO1	2	28.6	1	p36.23	Loss	enolase 1	0.172308	IGC-3CG-128|IGC-3CG-046
IGC	EFNB2	2	28.6	13	q33.3	Gain	ephrin B2	0.172308	IGC-3CG-104|IGC-3CG-146
IGC	ERG	2	28.6	21	q22.2	Gain|Loss	ERG ETS transcription factor	0.172308	IGC-3CG-046|IGC-3CG-104
IGC	EPB41L5	2	28.6	2	q14.2	Loss	erythrocyte membrane protein band 4.1 like 5	0.172308	IGC-3CG-046|IGC-3CG-104
IGC	ESR2	2	28.6	14	q23.3	Gain|Loss	estrogen receptor 2	0.172308	IGC-3CG-104|IGC-3CG-046
IGC	ETV1	2	28.6	7	p21.2	Gain|Loss	ETS variant 1	0.172308	IGC-3CG-104|IGC-3CG-099
IGC	EIF2S1	2	28.6	14	q23.3	Loss	eukaryotic translation initiation factor 2 subunit alpha	0.172308	IGC-3CG-104|IGC-3CG-128
IGC	EXOC4	2	28.6	7	q33	Gain	exocyst complex component 4	0.172308	IGC-3CG-128|IGC-3CG-104
IGC	FBXO11	2	28.6	2	p16.3	Gain|Loss	F-box protein 11	0.172308	IGC-3CG-104|IGC-3CG-046
IGC	FERMT2	2	28.6	14	q22.1	Gain|Loss	fermitin family member 2	0.172308	IGC-3CG-104|IGC-3CG-046
IGC	FGFR2	2	28.6	10	q26.13	Gain	fibroblast growth factor receptor 2	0.172308	IGC-3CG-146|IGC-3CG-104
IGC	FBLN5	2	28.6	14	q32.12	Gain|Loss	fibulin 5	0.172308	IGC-3CG-104|IGC-3CG-128
IGC	FLNA	2	28.6	X	q28	Gain|Loss	filamin A	0.172308	IGC-3CG-104|IGC-3CG-128
IGC	FOXC2	2	28.6	16	q24.1	Gain	forkhead box C2	0.172308	IGC-3CG-046|IGC-3CG-128
IGC	FOXK2	2	28.6	17	q25.3	Gain|Loss	forkhead box K2	0.172308	IGC-3CG-104|IGC-3CG-128
IGC	FOXN3	2	28.6	14	q32.11	Gain|Loss	forkhead box N3	0.172308	IGC-3CG-104|IGC-3CG-128
IGC	FOXO4	2	28.6	X	q13.1	Gain|Loss	forkhead box O4	0.172308	IGC-3CG-104|IGC-3CG-128
IGC	FOXP2	2	28.6	7	q31.1	Gain|Loss	forkhead box P2	0.172308	IGC-3CG-104|IGC-3CG-128
IGC	FHL1	2	28.6	X	q26.3	Gain|Loss	four and a half LIM domains 1	1	IGC-3CG-128|IGC-3CG-104
IGC	GJB2	2	28.6	13	q12.11	Gain|Loss	gap junction protein beta 2	0.172308	IGC-3CG-104|IGC-3CG-146
IGC	GATA1	2	28.6	X	p11.23	Gain|Loss	GATA binding protein 1	0.172308	IGC-3CG-104|IGC-3CG-128
IGC	GEMIN2	2	28.6	14	q21.1	Gain|Loss	gem nuclear organelle associated protein 2	0.172308	IGC-3CG-104|IGC-3CG-046
IGC	GOLPH3	2	28.6	5	p13.3	Gain|Loss	golgi phosphoprotein 3	1	IGC-3CG-104|IGC-3CG-046
IGC	HSF1	2	28.6	8	q24.3	Gain	heat shock transcription factor 1	0.172308	IGC-3CG-104|IGC-3CG-128
IGC	HAVCR2	2	28.6	5	q33.3	Loss	hepatitis A virus cellular receptor 2	0.172308	IGC-3CG-046|IGC-3CG-128
IGC	HDAC8	2	28.6	X	q13.1	Gain|Loss	histone deacetylase 8	0.172308	IGC-3CG-104|IGC-3CG-128
IGC	HOXD9	2	28.6	2	q31.1	Gain	homeobox D9	0.172308	IGC-3CG-099|IGC-3CG-104
IGC	HIPK2	2	28.6	7	q34	Gain|Loss	homeodomain interacting protein kinase 2	0.172308	IGC-3CG-128|IGC-3CG-104
IGC	HOTAIR	2	28.6	12	q13.13	Gain	HOX transcript antisense RNA	0.172308	IGC-3CG-046|IGC-3CG-128
IGC	ID1	2	28.6	20	q11.21	Gain|Loss	inhibitor of DNA binding 1 HLH protein	0.172308	IGC-3CG-104|IGC-3CG-046
IGC	IGF1R	2	28.6	15	q26.3	Gain|Loss	insulin like growth factor 1 receptor	0.172308	IGC-3CG-046|IGC-3CG-104
IGC	IDH2	2	28.6	15	q26.1	Loss	isocitrate dehydrogenase (NADP(+)) 2 mitochondrial	0.172308	IGC-3CG-046|IGC-3CG-146
IGC	JUN	2	28.6	1	p32.1	Gain|Loss	Jun proto-oncogene AP-1 transcription factor subunit	0.172308	IGC-3CG-128|IGC-3CG-104
IGC	KRT7	2	28.6	12	q13.13	Gain	keratin 7	0.172308	IGC-3CG-046|IGC-3CG-128
IGC	LMNB1	2	28.6	5	q23.2	Gain|Loss	lamin B1	0.172308	IGC-3CG-104|IGC-3CG-046
IGC	LAMA5	2	28.6	20	q13.33	Gain	laminin subunit alpha 5	0.172308	IGC-3CG-104|IGC-3CG-128
IGC	LASP1	2	28.6	17	q12	Gain|Loss	LIM and SH3 protein 1	0.172308	IGC-3CG-104|IGC-3CG-046
IGC	LIMS1	2	28.6	2	q12.3	Gain|Loss	LIM zinc finger domain containing 1	0.172308	IGC-3CG-104|IGC-3CG-046
IGC	LINC01186	2	28.6	X	p11.3	Gain|Loss	long intergenic non-protein coding RNA 1186	0.172308	IGC-3CG-104|IGC-3CG-128
IGC	LEF1	2	28.6	4	q25	Gain	lymphoid enhancer binding factor 1	0.611091	IGC-3CG-099|IGC-3CG-146
IGC	KDM6A	2	28.6	X	p11.3	Gain|Loss	lysine demethylase 6A	0.172308	IGC-3CG-104|IGC-3CG-128
IGC	KMT5A	2	28.6	12	q24.31	Gain|Loss	lysine methyltransferase 5A	0.172308	IGC-3CG-104|IGC-3CG-046
IGC	LOXL2	2	28.6	8	p21.3	Gain|Loss	lysyl oxidase like 2	0.172308	IGC-3CG-128|IGC-3CG-104
IGC	MEG3	2	28.6	14	q32.2	Gain	maternally expressed 3 (non-protein coding)	0.172308	IGC-3CG-104|IGC-3CG-046
IGC	MDM2	2	28.6	12	q15	Gain|Loss	MDM2 proto-oncogene	0.172308	IGC-3CG-104|IGC-3CG-046
IGC	MKL1	2	28.6	22	q13.2	Gain|Loss	megakaryoblastic leukemia (translocation) 1	0.172308	IGC-3CG-104|IGC-3CG-046
IGC	MSLN	2	28.6	16	p13.3	Gain|Loss	mesothelin	0.172308	IGC-3CG-104|IGC-3CG-008
IGC	MET	2	28.6	7	q31.2	Gain|Loss	MET proto-oncogene receptor tyrosine kinase	0.172308	IGC-3CG-104|IGC-3CG-128
IGC	MTDH	2	28.6	8	q22.1	Gain|Loss	metadherin	0.172308	IGC-3CG-104|IGC-3CG-046
IGC	MIR129-1	2	28.6	7	q32.1	Gain|Loss	microRNA 129-1	0.172308	IGC-3CG-128|IGC-3CG-104
IGC	MIR136	2	28.6	14	q32.2	Gain	microRNA 136	0.172308	IGC-3CG-104|IGC-3CG-046
IGC	MIR153-2	2	28.6	7	q36.3	Gain	microRNA 153-2	0.172308	IGC-3CG-046|IGC-3CG-128
IGC	MIR194-1	2	28.6	1	q41	Loss	microRNA 194-1	0.172308	IGC-3CG-046|IGC-3CG-128
IGC	MIR302A	2	28.6	4	q25	Loss	microRNA 302a	0.172308	IGC-3CG-046|IGC-3CG-128
IGC	MIR34A	2	28.6	1	p36.22	Gain|Loss	microRNA 34a	0.172308	IGC-3CG-104|IGC-3CG-128
IGC	MIR361	2	28.6	X	q21.2	Gain|Loss	microRNA 361	0.172308	IGC-3CG-128|IGC-3CG-104
IGC	MIR424	2	28.6	X	q26.3	Gain|Loss	microRNA 424	0.172308	IGC-3CG-128|IGC-3CG-104
IGC	MIR506	2	28.6	X	q27.3	Gain|Loss	microRNA 506	0.172308	IGC-3CG-128|IGC-3CG-104
IGC	MIR639	2	28.6	19	p13.12	Gain|Loss	microRNA 639	0.172308	IGC-3CG-104|IGC-3CG-046
IGC	MUC2	2	28.6	11	p15.5	Gain	mucin 2 oligomeric mucus/gel-forming	0.172308	IGC-3CG-104|IGC-3CG-128
IGC	MYCN	2	28.6	2	p24.3	Loss	MYCN proto-oncogene bHLH transcription factor	0.172308	IGC-3CG-099|IGC-3CG-126
IGC	NANOG	2	28.6	12	p13.31	Loss	Nanog homeobox	0.172308	IGC-3CG-046|IGC-3CG-128
IGC	NOV	2	28.6	8	q24.12	Gain	nephroblastoma overexpressed	0.172308	IGC-3CG-104|IGC-3CG-146
IGC	NTN4	2	28.6	12	q22	Gain|Loss	netrin 4	0.172308	IGC-3CG-104|IGC-3CG-046
IGC	NEDD4L	2	28.6	18	q21.31	Gain	neural precursor cell expressed developmentally down-regulated 4-like E3 ubiquitin protein ligase	0.172308	IGC-3CG-046|IGC-3CG-104
IGC	NREP	2	28.6	5	q22.1	Gain|Loss	neuronal regeneration related protein	0.172308	IGC-3CG-046|IGC-3CG-104
IGC	NLRP3	2	28.6	1	q44	Gain|Loss	NLR family pyrin domain containing 3	0.172308	IGC-3CG-104|IGC-3CG-128
IGC	NME1	2	28.6	17	q21.33	Gain|Loss	NME/NM23 nucleoside diphosphate kinase 1	0.172308	IGC-3CG-104|IGC-3CG-046
IGC	NOTCH1	2	28.6	9	q34.3	Gain|Loss	notch 1	0.172308	IGC-3CG-104|IGC-3CG-128
IGC	NUAK1	2	28.6	12	q23.3	Gain|Loss	NUAK family kinase 1	0.172308	IGC-3CG-046|IGC-3CG-104
IGC	NUCB2	2	28.6	11	p15.1	Loss	nucleobindin 2	0.172308	IGC-3CG-046|IGC-3CG-128
IGC	NUBPL	2	28.6	14	q12	Gain|Loss	nucleotide binding protein like	0.172308	IGC-3CG-104|IGC-3CG-046
IGC	OLA1	2	28.6	2	q31.1	Loss	Obg like ATPase 1	0.172308	IGC-3CG-046|IGC-3CG-128
IGC	ONECUT2	2	28.6	18	q21.31	Gain|Loss	one cut homeobox 2	0.172308	IGC-3CG-046|IGC-3CG-104
IGC	PAK5	2	28.6	20	p12.2	Gain|Loss	p21 (RAC1) activated kinase 5	0.172308	IGC-3CG-104|IGC-3CG-128
IGC	PAX2	2	28.6	10	q24.31	Gain|Loss	paired box 2	0.172308	IGC-3CG-046|IGC-3CG-104
IGC	PBX3	2	28.6	9	q33.3	Gain	PBX homeobox 3	0.172308	IGC-3CG-046|IGC-3CG-104
IGC	PEBP4	2	28.6	8	p21.3	Gain|Loss	phosphatidylethanolamine binding protein 4	0.172308	IGC-3CG-128|IGC-3CG-104
IGC	PLA2G4A	2	28.6	1	q31.1	Gain	phospholipase A2 group IVA	0.172308	IGC-3CG-128|IGC-3CG-104
IGC	PIM2	2	28.6	X	p11.23	Gain|Loss	Pim-2 proto-oncogene serine/threonine kinase	0.172308	IGC-3CG-104|IGC-3CG-128
IGC	PLAUR	2	28.6	19	q13.31	Gain|Loss	plasminogen activator urokinase receptor	0.172308	IGC-3CG-104|IGC-3CG-046
IGC	PLS3	2	28.6	X	q23	Loss	plastin 3	0.552421	IGC-3CG-104|IGC-3CG-128
IGC	PHLDA2	2	28.6	11	p15.4	Gain	pleckstrin homology like domain family A member 2	0.172308	IGC-3CG-104|IGC-3CG-128
IGC	KCNH1	2	28.6	1	q32.2	Loss	potassium voltage-gated channel subfamily H member 1	0.172308	IGC-3CG-104|IGC-3CG-128
IGC	PSTPIP1	2	28.6	15	q24.3	Gain|Loss	proline-serine-threonine phosphatase interacting protein 1	0.172308	IGC-3CG-104|IGC-3CG-046
IGC	PRKAA1	2	28.6	5	p13.1	Gain|Loss	protein kinase AMP-activated catalytic subunit alpha 1	0.172308	IGC-3CG-104|IGC-3CG-046
IGC	PRKCE	2	28.6	2	p21	Gain|Loss	protein kinase C epsilon	0.172308	IGC-3CG-128|IGC-3CG-104
IGC	PRKCI	2	28.6	3	q26.2	Gain|Loss	protein kinase C iota	0.172308	IGC-3CG-104|IGC-3CG-046
IGC	PTPRZ1	2	28.6	7	q31.32	Gain|Loss	protein tyrosine phosphatase receptor type Z1	0.172308	IGC-3CG-128|IGC-3CG-104
IGC	PEAK1	2	28.6	15	q24.3	Loss	pseudopodium enriched atypical kinase 1	0.172308	IGC-3CG-104|IGC-3CG-146
IGC	QKI	2	28.6	6	q26	Gain|Loss	QKI KH domain containing RNA binding	0.172308	IGC-3CG-046|IGC-3CG-104
IGC	RAF1	2	28.6	3	p25.2	Gain|Loss	Raf-1 proto-oncogene serine/threonine kinase	0.172308	IGC-3CG-104|IGC-3CG-046
IGC	RASSF1	2	28.6	3	p21.31	Gain|Loss	Ras association domain family member 1	0.172308	IGC-3CG-128|IGC-3CG-104
IGC	RAC1	2	28.6	7	p22.1	Gain|Loss	ras-related C3 botulinum toxin substrate 1 (rho family small GTP binding protein Rac1)	0.552421	IGC-3CG-104|IGC-3CG-046
IGC	RMST	2	28.6	12	q23.1	Gain	rhabdomyosarcoma 2 associated transcript (non-protein coding)	0.552421	IGC-3CG-046|IGC-3CG-128
IGC	ROCK1	2	28.6	18	q11.1	Loss	Rho associated coiled-coil containing protein kinase 1	0.552421	IGC-3CG-046|IGC-3CG-104
IGC	RPS6KB1	2	28.6	17	q23.1	Loss	ribosomal protein S6 kinase B1	0.172308	IGC-3CG-046|IGC-3CG-104
IGC	RUNX1	2	28.6	21	q22.12	Gain|Loss	runt related transcription factor 1	0.172308	IGC-3CG-046|IGC-3CG-104
IGC	RUNX2	2	28.6	6	p21.1	Gain|Loss	runt related transcription factor 2	0.172308	IGC-3CG-104|IGC-3CG-128
IGC	SEMA3E	2	28.6	7	q21.11	Gain	semaphorin 3E	0.172308	IGC-3CG-104|IGC-3CG-128
IGC	STK26	2	28.6	X	q26.2	Gain|Loss	serine/threonine kinase 26	0.172308	IGC-3CG-128|IGC-3CG-104
IGC	STK33	2	28.6	11	p15.4	Loss	serine/threonine kinase 33	0.172308	IGC-3CG-104|IGC-3CG-126
IGC	STAT1	2	28.6	2	q32.2	Gain|Loss	signal transducer and activator of transcription 1	0.172308	IGC-3CG-104|IGC-3CG-146
IGC	SKIL	2	28.6	3	q26.2	Gain|Loss	SKI like proto-oncogene	0.172308	IGC-3CG-104|IGC-3CG-046
IGC	SKI	2	28.6	1	p36.33	Gain|Loss	SKI proto-oncogene	0.172308	IGC-3CG-104|IGC-3CG-099
IGC	SLIT3	2	28.6	5	q35.1	Gain|Loss	slit guidance ligand 3	0.172308	IGC-3CG-104|IGC-3CG-046
IGC	SRI	2	28.6	7	q21.12	Gain|Loss	sorcin	0.172308	IGC-3CG-128|IGC-3CG-104
IGC	SALL1	2	28.6	16	q12.1	Gain	spalt like transcription factor 1	0.172308	IGC-3CG-046|IGC-3CG-104
IGC	SALL4	2	28.6	20	q13.2	Loss	spalt like transcription factor 4	0.172308	IGC-3CG-046|IGC-3CG-104
IGC	SRC	2	28.6	20	q11.23	Gain|Loss	SRC proto-oncogene non-receptor tyrosine kinase	0.172308	IGC-3CG-104|IGC-3CG-128
IGC	SMC1A	2	28.6	X	p11.22	Gain|Loss	structural maintenance of chromosomes 1A	0.172308	IGC-3CG-104|IGC-3CG-128
IGC	SENP2	2	28.6	3	q27.2	Gain|Loss	SUMO1/sentrin/SMT3 specific peptidase 2	0.172308	IGC-3CG-104|IGC-3CG-046
IGC	SDC2	2	28.6	8	q22.1	Gain	syndecan 2	0.172308	IGC-3CG-128|IGC-3CG-104
IGC	TBK1	2	28.6	12	q14.2	Gain|Loss	TANK binding kinase 1	0.172308	IGC-3CG-104|IGC-3CG-046
IGC	TNS1	2	28.6	2	q35	Gain	tensin 1	0.172308	IGC-3CG-046|IGC-3CG-128
IGC	THBD	2	28.6	20	p11.21	Gain	thrombomodulin	0.172308	IGC-3CG-046|IGC-3CG-128
IGC	TYMS	2	28.6	18	p11.32	Gain|Loss	thymidylate synthetase	0.172308	IGC-3CG-104|IGC-3CG-046
IGC	TBL1XR1	2	28.6	3	q26.32	Gain|Loss	transducin beta like 1 X-linked receptor 1	0.172308	IGC-3CG-104|IGC-3CG-046
IGC	TGFBR1	2	28.6	9	q22.33	Gain|Loss	transforming growth factor beta receptor 1	0.172308	IGC-3CG-046|IGC-3CG-104
IGC	TGFBR2	2	28.6	3	p24.1	Gain	transforming growth factor beta receptor 2	0.172308	IGC-3CG-104|IGC-3CG-128
IGC	TGFBR3	2	28.6	1	p22.1	Loss	transforming growth factor beta receptor 3	0.172308	IGC-3CG-046|IGC-3CG-128
IGC	TRPC5	2	28.6	X	q23	Gain|Loss	transient receptor potential cation channel subfamily C member 5	0.172308	IGC-3CG-104|IGC-3CG-128
IGC	TRIM33	2	28.6	1	p13.2	Loss	tripartite motif containing 33	0.172308	IGC-3CG-046|IGC-3CG-104
IGC	TP73	2	28.6	1	p36.32	Gain|Loss	tumor protein p73	0.172308	IGC-3CG-046|IGC-3CG-104
IGC	YWHAZ	2	28.6	8	q22.3	Gain	tyrosine 3-monooxygenase/tryptophan 5-monooxygenase activation protein zeta	0.172308	IGC-3CG-104|IGC-3CG-146
IGC	UBR5	2	28.6	8	q22.3	Gain	ubiquitin protein ligase E3 component n-recognin 5	0.552421	IGC-3CG-104|IGC-3CG-128
IGC	VDR	2	28.6	12	q13.11	Gain	vitamin D receptor	0.172308	IGC-3CG-128|IGC-3CG-104
IGC	WWTR1	2	28.6	3	q25.1	Gain|Loss	WW domain containing transcription regulator 1	0.172308	IGC-3CG-104|IGC-3CG-046
IGC	XBP1	2	28.6	22	q12.1	Gain|Loss	X-box binding protein 1	0.172308	IGC-3CG-104|IGC-3CG-046
IGC	ZNF217	2	28.6	20	q13.2	Gain|Loss	zinc finger protein 217	0.172308	IGC-3CG-104|IGC-3CG-046
IGC	XRN2	1	14.3	20	p11.22	Gain	5'-3' exoribonuclease 2	0.355918	IGC-3CG-128
IGC	ASCL2	1	14.3	11	p15.5	Gain	achaete-scute family bHLH transcription factor 2	0.355918	IGC-3CG-046
IGC	ACTG2	1	14.3	2	p13.1	Gain|Loss	actin gamma 2 smooth muscle enteric	0.355918	IGC-3CG-104
IGC	AJAP1	1	14.3	1	p36.32	Gain|Loss	adherens junctions associated protein 1	0.355918	IGC-3CG-104
IGC	ADIPOQ	1	14.3	3	q27.3	Gain|Loss	adiponectin C1Q and collagen domain containing	0.355918	IGC-3CG-104
IGC	AKT1	1	14.3	14	q32.33	Gain	AKT serine/threonine kinase 1	0.355918	IGC-3CG-104
IGC	AKT2	1	14.3	19	q13.2	Gain	AKT serine/threonine kinase 2	0.355918	IGC-3CG-104
IGC	ALDH1A1	1	14.3	9	q21.13	Gain	aldehyde dehydrogenase 1 family member A1	0.355918	IGC-3CG-104
IGC	ANG	1	14.3	14	q11.2	Gain	angiogenin	0.355918	IGC-3CG-104
IGC	ANXA2	1	14.3	15	q22.2	Gain	annexin A2	0.355918	IGC-3CG-104
IGC	AGR2	1	14.3	7	p21.1	Gain	anterior gradient 2 protein disulphide isomerase family member	0.355918	IGC-3CG-104
IGC	AQP3	1	14.3	9	p13.3	Gain	aquaporin 3 (Gill blood group)	0.355918	IGC-3CG-104
IGC	AQP9	1	14.3	15	q21.3	Loss	aquaporin 9	0.355918	IGC-3CG-104
IGC	ATM	1	14.3	11	q22.3	Gain|Loss	ATM serine/threonine kinase	0.355918	IGC-3CG-104
IGC	AXIN2	1	14.3	17	q24.1	Gain	axin 2	0.355918	IGC-3CG-104
IGC	AXL	1	14.3	19	q13.2	Gain	AXL receptor tyrosine kinase	0.355918	IGC-3CG-104
IGC	BSG	1	14.3	19	p13.3	Gain	basigin (Ok blood group)	0.355918	IGC-3CG-104
IGC	BCL2L1	1	14.3	20	q11.21	Gain	BCL2 like 1	0.355918	IGC-3CG-104
IGC	BTRC	1	14.3	10	q24.32	Gain|Loss	beta-transducin repeat containing E3 ubiquitin protein ligase	0.355918	IGC-3CG-104
IGC	BMP2	1	14.3	20	p12.3	Gain	bone morphogenetic protein 2	0.355918	IGC-3CG-128
IGC	BMP6	1	14.3	6	p24.3	Loss	bone morphogenetic protein 6	0.355918	IGC-3CG-104
IGC	BRAF	1	14.3	7	q34	Gain|Loss	B-Raf proto-oncogene serine/threonine kinase	0.355918	IGC-3CG-104
IGC	BRF2	1	14.3	8	p11.23	Gain	BRF2 RNA polymerase III transcription initiation factor subunit	0.355918	IGC-3CG-104
IGC	BTBD7	1	14.3	14	q32.12	Loss	BTB domain containing 7	0.355918	IGC-3CG-128
IGC	CDH1	1	14.3	16	q22.1	Loss	cadherin 1	0.355918	IGC-3CG-046
IGC	CDH11	1	14.3	16	q21	Gain	cadherin 11	1	IGC-3CG-104
IGC	CDH2	1	14.3	18	q12.1	Gain	cadherin 2	0.355918	IGC-3CG-046
IGC	CREB1	1	14.3	2	q33.3	Loss	cAMP responsive element binding protein 1	0.355918	IGC-3CG-104
IGC	CTSZ	1	14.3	20	q13.32	Gain	cathepsin Z	0.355918	IGC-3CG-128
IGC	CAV1	1	14.3	7	q31.2	Gain|Loss	caveolin 1	1	IGC-3CG-128
IGC	CBLB	1	14.3	3	q13.11	Gain	Cbl proto-oncogene B	0.355918	IGC-3CG-099
IGC	CCL3	1	14.3	17	q12	Loss	C-C motif chemokine ligand 3	0.355918	IGC-3CG-104
IGC	CD14	1	14.3	5	q31.3	Loss	CD14 molecule	0.355918	IGC-3CG-046
IGC	CD151	1	14.3	11	p15.5	Gain	CD151 molecule (Raph blood group)	0.355918	IGC-3CG-104
IGC	CD44	1	14.3	11	p13	Gain	CD44 molecule (Indian blood group)	0.355918	IGC-3CG-128
IGC	CD63	1	14.3	12	q13.2	Gain	CD63 molecule	0.355918	IGC-3CG-104
IGC	CD82	1	14.3	11	p11.2	Gain	CD82 molecule	0.355918	IGC-3CG-104
IGC	CEMIP	1	14.3	15	q25.1	Loss	cell migration inducing hyaluronan binding protein	0.355918	IGC-3CG-104
IGC	CLDN1	1	14.3	3	q28	Loss	claudin 1	0.355918	IGC-3CG-104
IGC	CLDN4	1	14.3	7	q11.23	Loss	claudin 4	0.355918	IGC-3CG-046
IGC	F2R	1	14.3	5	q13.3	Loss	coagulation factor II thrombin receptor	0.355918	IGC-3CG-046
IGC	CIRBP	1	14.3	19	p13.3	Gain	cold inducible RNA binding protein	0.355918	IGC-3CG-104
IGC	COL8A1	1	14.3	3	q12.1	Loss	collagen type VIII alpha 1 chain	0.355918	IGC-3CG-104
IGC	C5AR1	1	14.3	19	q13.32	Loss	complement C5a receptor 1	0.355918	IGC-3CG-046
IGC	CPS1-IT1	1	14.3	2	q34	Loss	CPS1 intronic transcript 1	0.355918	IGC-3CG-104
IGC	CRKL	1	14.3	22	q11.21	Gain	CRK like proto-oncogene adaptor protein	0.355918	IGC-3CG-104
IGC	CTBP1	1	14.3	4	p16.3	Gain	C-terminal binding protein 1	0.355918	IGC-3CG-104
IGC	CUL4A	1	14.3	13	q34	Gain	cullin 4A	0.355918	IGC-3CG-104
IGC	CXCL13	1	14.3	4	q21.1	Gain	C-X-C motif chemokine ligand 13	0.355918	IGC-3CG-104
IGC	CXCL14	1	14.3	5	q31.1	Gain	C-X-C motif chemokine ligand 14	0.355918	IGC-3CG-046
IGC	CCND2	1	14.3	12	p13.32	Gain	cyclin D2	0.355918	IGC-3CG-104
IGC	CDK5	1	14.3	7	q36.1	Gain	cyclin dependent kinase 5	0.355918	IGC-3CG-128
IGC	CDKN2A	1	14.3	9	p21.3	Gain|Loss	cyclin dependent kinase inhibitor 2A	0.355918	IGC-3CG-104
IGC	CYP7B1	1	14.3	8	q12.3	Gain	cytochrome P450 family 7 subfamily B member 1	0.355918	IGC-3CG-128
IGC	DAB2	1	14.3	5	p13.1	Gain|Loss	DAB2 clathrin adaptor protein	0.355918	IGC-3CG-104
IGC	DAPK1	1	14.3	9	q21.33	Gain	death associated protein kinase 1	0.355918	IGC-3CG-104
IGC	DICER1	1	14.3	14	q32.13	Gain	dicer 1 ribonuclease III	0.355918	IGC-3CG-046
IGC	DDR2	1	14.3	1	q23.3	Gain	discoidin domain receptor tyrosine kinase 2	0.355918	IGC-3CG-128
IGC	DLX2	1	14.3	2	q31.1	Gain	distal-less homeobox 2	0.355918	IGC-3CG-104
IGC	DNMT3B	1	14.3	20	q11.21	Loss	DNA methyltransferase 3 beta	0.355918	IGC-3CG-046
IGC	DNAJB6	1	14.3	7	q36.3	Gain|Loss	DnaJ heat shock protein family (Hsp40) member B6	0.355918	IGC-3CG-104
IGC	DCLK1	1	14.3	13	q13.3	Loss	doublecortin like kinase 1	0.355918	IGC-3CG-104
IGC	EGR1	1	14.3	5	q31.2	Gain	early growth response 1	0.355918	IGC-3CG-104
IGC	EML4	1	14.3	2	p21	Gain	echinoderm microtubule associated protein like 4	0.355918	IGC-3CG-146
IGC	EGFL7	1	14.3	9	q34.3	Gain	EGF like domain multiple 7	0.355918	IGC-3CG-104
IGC	EZH2	1	14.3	7	q36.1	Gain|Loss	enhancer of zeste 2 polycomb repressive complex 2 subunit	0.355918	IGC-3CG-104
IGC	EPHB3	1	14.3	3	q27.1	Gain	EPH receptor B3	0.355918	IGC-3CG-104
IGC	EPCAM	1	14.3	2	p21	Loss	epithelial cell adhesion molecule	0.355918	IGC-3CG-046
IGC	ESRP1	1	14.3	8	q22.1	Loss	epithelial splicing regulatory protein 1	0.355918	IGC-3CG-046
IGC	ERRFI1	1	14.3	1	p36.23	Loss	ERBB receptor feedback inhibitor 1	0.355918	IGC-3CG-128
IGC	ERBIN	1	14.3	5	q12.3	Loss	erbb2 interacting protein	0.355918	IGC-3CG-046
IGC	ESR1	1	14.3	6	q25.1	Gain|Loss	estrogen receptor 1	0.355918	IGC-3CG-104
IGC	ESRRB	1	14.3	14	q24.3	Loss	estrogen related receptor beta	0.355918	IGC-3CG-104
IGC	ETS2	1	14.3	21	q22.2	Gain	ETS proto-oncogene 2 transcription factor	0.355918	IGC-3CG-104
IGC	EIF2AK3	1	14.3	2	p11.2	Gain	eukaryotic translation initiation factor 2 alpha kinase 3	0.355918	IGC-3CG-104
IGC	EIF3I	1	14.3	1	p35.1	Gain	eukaryotic translation initiation factor 3 subunit I	0.355918	IGC-3CG-104
IGC	EIF4E	1	14.3	4	q23	Loss	eukaryotic translation initiation factor 4E	0.355918	IGC-3CG-046
IGC	EIF5A2	1	14.3	3	q26.2	Gain|Loss	eukaryotic translation initiation factor 5A2	0.355918	IGC-3CG-104
IGC	EXOC7	1	14.3	17	q25.1	Loss	exocyst complex component 7	0.355918	IGC-3CG-128
IGC	EZR	1	14.3	6	q25.3	Gain	ezrin	0.355918	IGC-3CG-104
IGC	FAM3C	1	14.3	7	q31.31	Gain	family with sequence similarity 3 member C	0.355918	IGC-3CG-128
IGC	FAS	1	14.3	10	q23.31	Loss	Fas cell surface death receptor	0.355918	IGC-3CG-104
IGC	FASN	1	14.3	17	q25.3	Gain	fatty acid synthase	0.355918	IGC-3CG-104
IGC	FBXW7	1	14.3	4	q31.3	Gain|Loss	F-box and WD repeat domain containing 7	0.355918	IGC-3CG-104
IGC	FGF2	1	14.3	4	q28.1	Gain	fibroblast growth factor 2	0.355918	IGC-3CG-104
IGC	FGFR1	1	14.3	8	p11.23	Gain	fibroblast growth factor receptor 1	0.355918	IGC-3CG-104
IGC	FBLN1	1	14.3	22	q13.31	Loss	fibulin 1	1	IGC-3CG-104
IGC	FCN2	1	14.3	9	q34.3	Gain	ficolin 2	0.355918	IGC-3CG-104
IGC	FSHR	1	14.3	2	p16.3	Loss	follicle stimulating hormone receptor	0.355918	IGC-3CG-104
IGC	FOXA1	1	14.3	14	q21.1	Gain	forkhead box A1	0.355918	IGC-3CG-104
IGC	FOXA2	1	14.3	20	p11.21	Gain	forkhead box A2	0.355918	IGC-3CG-128
IGC	FOXC1	1	14.3	6	p25.3	Gain	forkhead box C1	0.355918	IGC-3CG-104
IGC	FOXJ2	1	14.3	12	p13.31	Loss	forkhead box J2	0.355918	IGC-3CG-046
IGC	FOXM1	1	14.3	12	p13.33	Gain	forkhead box M1	0.355918	IGC-3CG-104
IGC	FOXN1	1	14.3	17	q11.2	Loss	forkhead box N1	0.355918	IGC-3CG-104
IGC	FOXO1	1	14.3	13	q14.11	Gain	forkhead box O1	0.355918	IGC-3CG-146
IGC	FOXO3	1	14.3	6	q21	Gain	forkhead box O3	0.355918	IGC-3CG-104
IGC	FOXQ1	1	14.3	6	p25.3	Gain	forkhead box Q1	0.355918	IGC-3CG-104
IGC	FOXR2	1	14.3	X	p11.21	Loss	forkhead box R2	0.355918	IGC-3CG-128
IGC	FRAT1	1	14.3	10	q24.1	Gain	FRAT1 WNT signaling pathway regulator	0.355918	IGC-3CG-104
IGC	FBP1	1	14.3	9	q22.32	Gain	fructose-bisphosphatase 1	0.355918	IGC-3CG-104
IGC	FURIN	1	14.3	15	q26.1	Gain|Loss	furin paired basic amino acid cleaving enzyme	0.355918	IGC-3CG-104
IGC	GPR32	1	14.3	19	q13.33	Gain	G protein-coupled receptor 32	0.355918	IGC-3CG-104
IGC	GJB1	1	14.3	X	q13.1	Loss	gap junction protein beta 1	0.355918	IGC-3CG-128
IGC	GSN	1	14.3	9	q33.2	Gain	gelsolin	0.355918	IGC-3CG-104
IGC	GMNN	1	14.3	6	p22.3	Gain	geminin DNA replication inhibitor	0.355918	IGC-3CG-104
IGC	GIPC2	1	14.3	1	p31.1	Loss	GIPC PDZ domain containing family member 2	0.355918	IGC-3CG-104
IGC	GLI1	1	14.3	12	q13.3	Gain	GLI family zinc finger 1	0.355918	IGC-3CG-104
IGC	GRIN1	1	14.3	9	q34.3	Gain	glutamate ionotropic receptor NMDA type subunit 1	0.355918	IGC-3CG-104
IGC	GLS	1	14.3	2	q32.2	Loss	glutaminase	0.355918	IGC-3CG-146
IGC	GOLM1	1	14.3	9	q21.33	Gain	golgi membrane protein 1	0.355918	IGC-3CG-104
IGC	GOLGA2	1	14.3	9	q34.11	Gain	golgin A2	0.355918	IGC-3CG-104
IGC	HAS2-AS1	1	14.3	8	q24.13	Gain	HAS2 antisense RNA 1	0.355918	IGC-3CG-104
IGC	HSPA5	1	14.3	9	q33.3	Loss	heat shock protein family A (Hsp70) member 5	0.355918	IGC-3CG-046
IGC	HS6ST2	1	14.3	X	q26.2	Loss	heparan sulfate 6-O-sulfotransferase 2	0.355918	IGC-3CG-128
IGC	HS3ST3B1	1	14.3	17	p12	Gain	heparan sulfate-glucosamine 3-sulfotransferase 3B1	1	IGC-3CG-104
IGC	HPSE	1	14.3	4	q21.23	Gain	heparanase	0.355918	IGC-3CG-104
IGC	HBEGF	1	14.3	5	q31.3	Gain	heparin binding EGF like growth factor	0.355918	IGC-3CG-104
IGC	HNF4A	1	14.3	20	q13.12	Gain|Loss	hepatocyte nuclear factor 4 alpha	0.355918	IGC-3CG-104
IGC	HIC1	1	14.3	17	p13.3	Gain	HIC ZBTB transcriptional repressor 1	0.355918	IGC-3CG-104
IGC	HMGB1	1	14.3	13	q12.3	Gain	high mobility group box 1	0.355918	IGC-3CG-104
IGC	HMGB3	1	14.3	X	q28	Loss	high mobility group box 3	0.355918	IGC-3CG-128
IGC	HRG	1	14.3	3	q27.3	Gain	histidine rich glycoprotein	0.355918	IGC-3CG-104
IGC	HDAC6	1	14.3	X	p11.23	Loss	histone deacetylase 6	0.355918	IGC-3CG-128
IGC	HDAC9	1	14.3	7	p21.1	Loss	histone deacetylase 9	0.355918	IGC-3CG-104
IGC	HOXA13	1	14.3	7	p15.2	Gain	homeobox A13	0.355918	IGC-3CG-128
IGC	HRAS	1	14.3	11	p15.5	Gain	HRas proto-oncogene GTPase	0.355918	IGC-3CG-104
IGC	HAS2	1	14.3	8	q24.13	Gain	hyaluronan synthase 2	0.355918	IGC-3CG-104
IGC	IKBKG	1	14.3	X	q28	Loss	inhibitor of nuclear factor kappa B kinase subunit gamma	0.355918	IGC-3CG-128
IGC	INPP4B	1	14.3	4	q31.21	Gain|Loss	inositol polyphosphate-4-phosphatase type II B	0.355918	IGC-3CG-104
IGC	IGF1	1	14.3	12	q23.2	Gain	insulin like growth factor 1	0.355918	IGC-3CG-104
IGC	IRS1	1	14.3	2	q36.3	Gain|Loss	insulin receptor substrate 1	0.355918	IGC-3CG-104
IGC	IRS2	1	14.3	13	q34	Gain	insulin receptor substrate 2	0.355918	IGC-3CG-104
IGC	ILK	1	14.3	11	p15.4	Gain	integrin linked kinase	0.355918	IGC-3CG-128
IGC	ITGA2	1	14.3	5	q11.2	Loss	integrin subunit alpha 2	0.355918	IGC-3CG-104
IGC	ITGB1	1	14.3	10	p11.22	Loss	integrin subunit beta 1	0.355918	IGC-3CG-104
IGC	ITGB3	1	14.3	17	q21.32	Gain|Loss	integrin subunit beta 3	0.355918	IGC-3CG-104
IGC	IRF8	1	14.3	16	q24.1	Gain	interferon regulatory factor 8	0.355918	IGC-3CG-104
IGC	IL27	1	14.3	16	p11.2	Gain	interleukin 27	0.355918	IGC-3CG-104
IGC	IL6R	1	14.3	1	q21.3	Loss	interleukin 6 receptor	0.355918	IGC-3CG-046
IGC	ITCH	1	14.3	20	q11.22	Loss	itchy E3 ubiquitin protein ligase	0.355918	IGC-3CG-046
IGC	JAG1	1	14.3	20	p12.2	Gain	jagged 1	0.355918	IGC-3CG-128
IGC	JAK2	1	14.3	9	p24.1	Gain|Loss	Janus kinase 2	0.355918	IGC-3CG-104
IGC	JAK3	1	14.3	19	p13.11	Loss	Janus kinase 3	0.355918	IGC-3CG-046
IGC	KRT18	1	14.3	12	q13.13	Gain	keratin 18	0.355918	IGC-3CG-104
IGC	KRT19	1	14.3	17	q21.2	Gain	keratin 19	0.355918	IGC-3CG-046
IGC	KRT8	1	14.3	12	q13.13	Gain|Loss	keratin 8	0.355918	IGC-3CG-104
IGC	KHDRBS1	1	14.3	1	p35.2	Loss	KH RNA binding domain containing signal transduction associated 1	0.355918	IGC-3CG-128
IGC	KDR	1	14.3	4	q12	Loss	kinase insert domain receptor	0.355918	IGC-3CG-104
IGC	KL	1	14.3	13	q13.1	Gain|Loss	klotho	0.355918	IGC-3CG-104
IGC	KRAS	1	14.3	12	p12.1	Gain	KRAS proto-oncogene GTPase	0.355918	IGC-3CG-104
IGC	KLF4	1	14.3	9	q31.2	Gain|Loss	Kruppel like factor 4	0.355918	IGC-3CG-104
IGC	L1CAM	1	14.3	X	q28	Loss	L1 cell adhesion molecule	0.355918	IGC-3CG-128
IGC	LAMA1	1	14.3	18	p11.31	Gain|Loss	laminin subunit alpha 1	0.355918	IGC-3CG-104
IGC	LAMC2	1	14.3	1	q25.3	Gain|Loss	laminin subunit gamma 2	0.355918	IGC-3CG-104
IGC	LATS1	1	14.3	6	q25.1	Loss	large tumor suppressor kinase 1	0.355918	IGC-3CG-046
IGC	LTBP1	1	14.3	2	p22.3	Loss	latent transforming growth factor beta binding protein 1	0.355918	IGC-3CG-104
IGC	LEFTY1	1	14.3	1	q42.12	Gain	left-right determination factor 1	0.355918	IGC-3CG-104
IGC	LEP	1	14.3	7	q32.1	Gain	leptin	0.355918	IGC-3CG-128
IGC	LETMD1	1	14.3	12	q13.12	Loss	LETM1 domain containing 1	0.355918	IGC-3CG-046
IGC	LGR4	1	14.3	11	p14.1	Loss	leucine rich repeat containing G protein-coupled receptor 4	0.355918	IGC-3CG-104
IGC	LRIG1	1	14.3	3	p14.1	Gain	leucine rich repeats and immunoglobulin like domains 1	0.355918	IGC-3CG-104
IGC	LIMA1	1	14.3	12	q13.12	Loss	LIM domain and actin binding 1	0.355918	IGC-3CG-046
IGC	LHX2	1	14.3	9	q33.3	Gain	LIM homeobox 2	0.355918	IGC-3CG-104
IGC	LCN2	1	14.3	9	q34.11	Gain	lipocalin 2	0.355918	IGC-3CG-104
IGC	LINC00261	1	14.3	20	p11.21	Gain	long intergenic non-protein coding RNA 261	0.355918	IGC-3CG-128
IGC	KAT8	1	14.3	16	p11.2	Gain	lysine acetyltransferase 8	0.355918	IGC-3CG-104
IGC	KDM1A	1	14.3	1	p36.12	Loss	lysine demethylase 1A	0.355918	IGC-3CG-104
IGC	MAGEC2	1	14.3	X	q27.2	Loss	MAGE family member C2	0.355918	IGC-3CG-128
IGC	MAGED1	1	14.3	X	p11.22	Loss	MAGE family member D1	0.355918	IGC-3CG-128
IGC	MCRIP1	1	14.3	17	q25.3	Gain	MAPK regulated corepressor interacting protein 1	0.355918	IGC-3CG-104
IGC	MARVELD1	1	14.3	10	q24.2	Loss	MARVEL domain containing 1	0.355918	IGC-3CG-146
IGC	MMP13	1	14.3	11	q22.2	Loss	matrix metallopeptidase 13	0.355918	IGC-3CG-104
IGC	MMP7	1	14.3	11	q22.2	Gain|Loss	matrix metallopeptidase 7	0.355918	IGC-3CG-104
IGC	MMP9	1	14.3	20	q13.12	Gain	matrix metallopeptidase 9	0.355918	IGC-3CG-128
IGC	MCL1	1	14.3	1	q21.2	Gain	MCL1 BCL2 family apoptosis regulator	0.355918	IGC-3CG-104
IGC	MDM4	1	14.3	1	q32.1	Gain	MDM4 p53 regulator	0.355918	IGC-3CG-128
IGC	MTOR	1	14.3	1	p36.22	Gain	mechanistic target of rapamycin	0.355918	IGC-3CG-104
IGC	MTA1	1	14.3	14	q32.33	Gain	metastasis associated 1	0.355918	IGC-3CG-104
IGC	MTA3	1	14.3	2	p21	Loss	metastasis associated 1 family member 3	0.355918	IGC-3CG-046
IGC	MBD3	1	14.3	19	p13.3	Gain	methyl-CpG binding domain protein 3	0.355918	IGC-3CG-104
IGC	MTHFD2	1	14.3	2	p13.1	Gain|Loss	methylenetetrahydrofolate dehydrogenase (NADP+ dependent) 2 methenyltetrahydrofolate cyclohydrolase	0.355918	IGC-3CG-104
IGC	MICALL2	1	14.3	7	p22.3	Gain	MICAL like 2	0.355918	IGC-3CG-104
IGC	MIR100	1	14.3	11	q24.1	Loss	microRNA 100	0.355918	IGC-3CG-104
IGC	MIR106A	1	14.3	X	q26.2	Loss	microRNA 106a	0.355918	IGC-3CG-128
IGC	MIR124-1	1	14.3	8	p23.1	Gain	microRNA 124-1	0.355918	IGC-3CG-146
IGC	MIR124-2	1	14.3	8	q12.3	Gain	microRNA 124-2	0.355918	IGC-3CG-128
IGC	MIR124-3	1	14.3	20	q13.33	Gain	microRNA 124-3	0.355918	IGC-3CG-128
IGC	MIR132	1	14.3	17	p13.3	Gain	microRNA 132	0.355918	IGC-3CG-104
IGC	MIR134	1	14.3	14	q32.31	Gain	microRNA 134	0.355918	IGC-3CG-046
IGC	MIR15B	1	14.3	3	q25.33	Gain	microRNA 15b	0.355918	IGC-3CG-104
IGC	MIR17	1	14.3	13	q31.3	Gain	microRNA 17	0.355918	IGC-3CG-104
IGC	MIR19A	1	14.3	13	q31.3	Gain	microRNA 19a	0.355918	IGC-3CG-104
IGC	MIR204	1	14.3	9	q21.12	Gain	microRNA 204	0.355918	IGC-3CG-046
IGC	MIR205	1	14.3	1	q32.2	Gain	microRNA 205	0.355918	IGC-3CG-046
IGC	MIR208A	1	14.3	14	q11.2	Gain	microRNA 208a	0.355918	IGC-3CG-104
IGC	MIR20A	1	14.3	13	q31.3	Gain	microRNA 20a	0.355918	IGC-3CG-104
IGC	MIR21	1	14.3	17	q23.1	Loss	microRNA 21	0.355918	IGC-3CG-046
IGC	MIR221	1	14.3	X	p11.3	Loss	microRNA 221	0.355918	IGC-3CG-128
IGC	MIR222	1	14.3	X	p11.3	Loss	microRNA 222	0.355918	IGC-3CG-128
IGC	MIR223	1	14.3	X	q12	Loss	microRNA 223	0.355918	IGC-3CG-128
IGC	MIR224	1	14.3	X	q28	Loss	microRNA 224	0.355918	IGC-3CG-128
IGC	MIR23B	1	14.3	9	q22.32	Loss	microRNA 23b	0.355918	IGC-3CG-104
IGC	MIR24-1	1	14.3	9	q22.32	Loss	microRNA 24-1	0.355918	IGC-3CG-104
IGC	MIR26A2	1	14.3	12	q14.1	Gain	microRNA 26a-2	0.355918	IGC-3CG-104
IGC	MIR29A	1	14.3	7	q32.3	Gain	microRNA 29a	0.355918	IGC-3CG-128
IGC	MIR29B1	1	14.3	7	q32.3	Gain	microRNA 29b-1	0.355918	IGC-3CG-128
IGC	MIR300	1	14.3	14	q32.31	Gain	microRNA 300	0.355918	IGC-3CG-046
IGC	MIR301A	1	14.3	17	q22	Loss	microRNA 301a	0.355918	IGC-3CG-046
IGC	MIR30B	1	14.3	8	q24.22	Gain	microRNA 30b	0.355918	IGC-3CG-128
IGC	MIR30C1	1	14.3	1	p34.2	Gain	microRNA 30c-1	0.355918	IGC-3CG-128
IGC	MIR30D	1	14.3	8	q24.22	Gain	microRNA 30d	0.355918	IGC-3CG-128
IGC	MIR30E	1	14.3	1	p34.2	Gain	microRNA 30e	0.355918	IGC-3CG-128
IGC	MIR381	1	14.3	14	q32.31	Gain	microRNA 381	0.355918	IGC-3CG-046
IGC	MIR382	1	14.3	14	q32.31	Gain	microRNA 382	0.355918	IGC-3CG-046
IGC	MIR452	1	14.3	X	q28	Loss	microRNA 452	0.355918	IGC-3CG-128
IGC	MIR454	1	14.3	17	q22	Loss	microRNA 454	0.355918	IGC-3CG-046
IGC	MIR485	1	14.3	14	q32.31	Gain	microRNA 485	0.355918	IGC-3CG-046
IGC	MIR487B	1	14.3	14	q32.31	Gain	microRNA 487b	0.355918	IGC-3CG-046
IGC	MIR489	1	14.3	7	q21.3	Gain	microRNA 489	0.355918	IGC-3CG-128
IGC	MIR494	1	14.3	14	q32.31	Gain	microRNA 494	0.355918	IGC-3CG-046
IGC	MIR517C	1	14.3	19	q13.42	Loss	microRNA 517c	0.355918	IGC-3CG-128
IGC	MIR520G	1	14.3	19	q13.42	Loss	microRNA 520g	0.355918	IGC-3CG-128
IGC	MIR522	1	14.3	19	q13.42	Loss	microRNA 522	0.355918	IGC-3CG-128
IGC	MIR616	1	14.3	12	q13.3	Loss	microRNA 616	0.355918	IGC-3CG-104
IGC	MIR638	1	14.3	19	p13.2	Gain	microRNA 638	0.355918	IGC-3CG-104
IGC	MIR646	1	14.3	20	q13.33	Gain	microRNA 646	0.355918	IGC-3CG-128
IGC	MIR655	1	14.3	14	q32.31	Gain	microRNA 655	0.355918	IGC-3CG-046
IGC	MIR663A	1	14.3	20	p11.1	Loss	microRNA 663a	0.355918	IGC-3CG-104
IGC	MIR7-1	1	14.3	9	q21.32	Loss	microRNA 7-1	0.355918	IGC-3CG-046
IGC	MIR888	1	14.3	X	q27.3	Loss	microRNA 888	0.355918	IGC-3CG-128
IGC	MIR92B	1	14.3	1	q22	Gain	microRNA 92b	0.355918	IGC-3CG-128
IGC	MIRLET7B	1	14.3	22	q13.31	Gain	microRNA let-7b	0.355918	IGC-3CG-128
IGC	MIR124-2HG	1	14.3	8	q12.3	Gain	MIR124-2 host gene	0.355918	IGC-3CG-128
IGC	MAPK1	1	14.3	22	q11.22	Loss	mitogen-activated protein kinase 1	0.355918	IGC-3CG-128
IGC	MAPK3	1	14.3	16	p11.2	Gain	mitogen-activated protein kinase 3	0.355918	IGC-3CG-104
IGC	MAPK7	1	14.3	17	p11.2	Gain	mitogen-activated protein kinase 7	0.355918	IGC-3CG-104
IGC	MAPK8	1	14.3	10	q11.22	Gain|Loss	mitogen-activated protein kinase 8	0.355918	IGC-3CG-104
IGC	MKL2	1	14.3	16	p13.12	Loss	MKL1/myocardin like 2	0.355918	IGC-3CG-104
IGC	MLLT3	1	14.3	9	p21.3	Loss	MLLT3 super elongation complex subunit	0.355918	IGC-3CG-104
IGC	MUC1	1	14.3	1	q22	Gain	mucin 1 cell surface associated	0.355918	IGC-3CG-128
IGC	MUC4	1	14.3	3	q29	Gain	mucin 4 cell surface associated	0.355918	IGC-3CG-104
IGC	MYBL2	1	14.3	20	q13.12	Loss	MYB proto-oncogene like 2	0.355918	IGC-3CG-046
IGC	MYB	1	14.3	6	q23.3	Gain|Loss	MYB proto-oncogene transcription factor	0.355918	IGC-3CG-104
IGC	NOX1	1	14.3	X	q22.1	Loss	NADPH oxidase 1	1	IGC-3CG-128
IGC	NRP1	1	14.3	10	p11.22	Loss	neuropilin 1	0.355918	IGC-3CG-104
IGC	NFKBIA	1	14.3	14	q13.2	Loss	NFKB inhibitor alpha	0.355918	IGC-3CG-046
IGC	NKX6-1	1	14.3	4	q21.23	Gain|Loss	NK6 homeobox 1	0.355918	IGC-3CG-104
IGC	NODAL	1	14.3	10	q22.1	Gain	nodal growth differentiation factor	0.355918	IGC-3CG-104
IGC	NOG	1	14.3	17	q22	Loss	noggin	0.355918	IGC-3CG-104
IGC	NEAT1	1	14.3	11	q13.1	Gain	nuclear paraspeckle assembly transcript 1 (non-protein coding)	0.355918	IGC-3CG-104
IGC	NR1I2	1	14.3	3	q13.33	Gain	nuclear receptor subfamily 1 group I member 2	0.355918	IGC-3CG-104
IGC	NR2F2	1	14.3	15	q26.2	Gain|Loss	nuclear receptor subfamily 2 group F member 2	0.355918	IGC-3CG-104
IGC	OPRM1	1	14.3	6	q25.2	Loss	opioid receptor mu 1	0.355918	IGC-3CG-104
IGC	OVOL2	1	14.3	20	p11.23	Loss	ovo like zinc finger 2	0.355918	IGC-3CG-046
IGC	PAK1	1	14.3	11	q14.1	Gain|Loss	p21 (RAC1) activated kinase 1	0.355918	IGC-3CG-104
IGC	PRRX1	1	14.3	1	q24.2	Gain	paired related homeobox 1	0.355918	IGC-3CG-104
IGC	PRRX2	1	14.3	9	q34.11	Loss	paired related homeobox 2	0.355918	IGC-3CG-128
IGC	PEG10	1	14.3	7	q21.3	Gain	paternally expressed 10	0.355918	IGC-3CG-128
IGC	PRDX1	1	14.3	1	p34.1	Loss	peroxiredoxin 1	0.355918	IGC-3CG-046
IGC	PTEN	1	14.3	10	q23.31	Gain|Loss	phosphatase and tensin homolog	0.355918	IGC-3CG-104
IGC	PEBP1	1	14.3	12	q24.23	Loss	phosphatidylethanolamine binding protein 1	0.355918	IGC-3CG-046
IGC	PDE4A	1	14.3	19	p13.2	Loss	phosphodiesterase 4A	0.355918	IGC-3CG-046
IGC	PIK3R3	1	14.3	1	p34.1	Loss	phosphoinositide-3-kinase regulatory subunit 3	0.355918	IGC-3CG-104
IGC	PITPNM3	1	14.3	17	p13.1	Gain	PITPNM family member 3	0.355918	IGC-3CG-104
IGC	PLAC8	1	14.3	4	q21.22	Loss	placenta specific 8	0.355918	IGC-3CG-046
IGC	PGF	1	14.3	14	q24.3	Gain	placental growth factor	0.355918	IGC-3CG-104
IGC	PDGFD	1	14.3	11	q22.3	Gain|Loss	platelet derived growth factor D	0.355918	IGC-3CG-104
IGC	PDGFRB	1	14.3	5	q32	Gain	platelet derived growth factor receptor beta	0.355918	IGC-3CG-128
IGC	PTN	1	14.3	7	q33	Gain	pleiotrophin	0.355918	IGC-3CG-128
IGC	PLXND1	1	14.3	3	q22.1	Gain	plexin D1	0.355918	IGC-3CG-104
IGC	PDPN	1	14.3	1	p36.21	Loss	podoplanin	0.355918	IGC-3CG-128
IGC	PCBP1	1	14.3	2	p13.3	Loss	poly(rC) binding protein 1	0.355918	IGC-3CG-046
IGC	PKD1	1	14.3	16	p13.3	Gain	polycystin 1 transient receptor potential channel interacting	0.355918	IGC-3CG-104
IGC	PAWR	1	14.3	12	q21.2	Gain	pro-apoptotic WT1 regulator	0.355918	IGC-3CG-104
IGC	PGRMC1	1	14.3	X	q24	Loss	progesterone receptor membrane component 1	0.355918	IGC-3CG-128
IGC	POMC	1	14.3	2	p23.3	Loss	proopiomelanocortin	0.355918	IGC-3CG-104
IGC	PCSK1	1	14.3	5	q15	Gain|Loss	proprotein convertase subtilisin/kexin type 1	0.355918	IGC-3CG-104
IGC	PROX1	1	14.3	1	q32.3	Gain	prospero homeobox 1	0.355918	IGC-3CG-046
IGC	PRKAA2	1	14.3	1	p32.2	Gain|Loss	protein kinase AMP-activated catalytic subunit alpha 2	0.355918	IGC-3CG-104
IGC	PRKCA	1	14.3	17	q24.2	Gain|Loss	protein kinase C alpha	0.355918	IGC-3CG-104
IGC	PRKCQ	1	14.3	10	p15.1	Loss	protein kinase C theta	0.355918	IGC-3CG-104
IGC	PPP1R8	1	14.3	1	p35.3	Loss	protein phosphatase 1 regulatory subunit 8	0.355918	IGC-3CG-128
IGC	PTPA	1	14.3	9	q34.11	Gain|Loss	protein phosphatase 2 phosphatase activator	0.355918	IGC-3CG-104
IGC	PPM1D	1	14.3	17	q23.2	Loss	protein phosphatase Mg2+/Mn2+ dependent 1D	0.355918	IGC-3CG-046
IGC	PTPN14	1	14.3	1	q41	Gain|Loss	protein tyrosine phosphatase non-receptor type 14	0.355918	IGC-3CG-104
IGC	PCMT1	1	14.3	6	q25.1	Loss	protein-L-isoaspartate (D-aspartate) O-methyltransferase	0.355918	IGC-3CG-046
IGC	PRUNE1	1	14.3	1	q21.3	Gain	prune exopolyphosphatase 1	0.355918	IGC-3CG-104
IGC	RAB22A	1	14.3	20	q13.32	Gain	RAB22A member RAS oncogene family	0.355918	IGC-3CG-128
IGC	RAB43	1	14.3	3	q21.3	Gain	RAB43 member RAS oncogene family	0.355918	IGC-3CG-104
IGC	RDX	1	14.3	11	q22.3	Loss	radixin	0.355918	IGC-3CG-104
IGC	RHOA	1	14.3	3	p21.31	Loss	ras homolog family member A	0.355918	IGC-3CG-046
IGC	RHOG	1	14.3	11	p15.4	Loss	ras homolog family member G	0.355918	IGC-3CG-104
IGC	RASA1	1	14.3	5	q14.3	Loss	RAS p21 protein activator 1	0.355918	IGC-3CG-104
IGC	RASAL2	1	14.3	1	q25.2	Gain|Loss	RAS protein activator like 2	0.355918	IGC-3CG-104
IGC	RB1	1	14.3	13	q14.2	Gain|Loss	RB transcriptional corepressor 1	0.355918	IGC-3CG-104
IGC	RACK1	1	14.3	5	q35.3	Gain|Loss	receptor for activated C kinase 1	0.355918	IGC-3CG-104
IGC	ROR2	1	14.3	9	q22.31	Gain|Loss	receptor tyrosine kinase like orphan receptor 2	0.355918	IGC-3CG-104
IGC	RGS3	1	14.3	9	q32	Gain|Loss	regulator of G protein signaling 3	0.355918	IGC-3CG-104
IGC	RELA	1	14.3	11	q13.1	Loss	RELA proto-oncogene NF-kB subunit	0.355918	IGC-3CG-104
IGC	REPIN1	1	14.3	7	q36.1	Gain	replication initiator 1	0.355918	IGC-3CG-128
IGC	ROCK2	1	14.3	2	p25.1	Gain|Loss	Rho associated coiled-coil containing protein kinase 2	0.355918	IGC-3CG-104
IGC	ARHGEF12	1	14.3	11	q23.3	Loss	Rho guanine nucleotide exchange factor 12	0.355918	IGC-3CG-104
IGC	ARHGEF2	1	14.3	1	q22	Gain	Rho/Rac guanine nucleotide exchange factor 2	0.355918	IGC-3CG-104
IGC	RNH1	1	14.3	11	p15.5	Gain|Loss	ribonuclease/angiogenin inhibitor 1	0.355918	IGC-3CG-104
IGC	RPL22L1	1	14.3	3	q26.2	Gain	ribosomal protein L22 like 1	0.355918	IGC-3CG-104
IGC	RNF111	1	14.3	15	q22.1	Loss	ring finger protein 111	0.355918	IGC-3CG-046
IGC	RBM8A	1	14.3	1	q21.1	Gain	RNA binding motif protein 8A	0.355918	IGC-3CG-104
IGC	ROS1	1	14.3	6	q22.1	Gain|Loss	ROS proto-oncogene 1 receptor tyrosine kinase	0.355918	IGC-3CG-104
IGC	RUNX3	1	14.3	1	p36.11	Gain	runt related transcription factor 3	0.355918	IGC-3CG-104
IGC	SATB1	1	14.3	3	p24.3	Gain	SATB homeobox 1	0.355918	IGC-3CG-046
IGC	SQSTM1	1	14.3	5	q35.3	Gain	sequestosome 1	0.355918	IGC-3CG-104
IGC	STK11	1	14.3	19	p13.3	Gain	serine/threonine kinase 11	0.355918	IGC-3CG-104
IGC	SERPINB4	1	14.3	18	q21.33	Loss	serpin family B member 4	0.355918	IGC-3CG-104
IGC	SERPINE1	1	14.3	7	q22.1	Loss	serpin family E member 1	0.355918	IGC-3CG-046
IGC	SERPINI1	1	14.3	3	q26.1	Loss	serpin family I member 1	0.355918	IGC-3CG-104
IGC	SETDB1	1	14.3	1	q21.3	Loss	SET domain bifurcated 1	0.355918	IGC-3CG-046
IGC	SHC1	1	14.3	1	q21.3	Gain	SHC adaptor protein 1	0.355918	IGC-3CG-128
IGC	SIAH2	1	14.3	3	q25.1	Gain	siah E3 ubiquitin protein ligase 2	0.355918	IGC-3CG-104
IGC	SIRT1	1	14.3	10	q21.3	Loss	sirtuin 1	0.355918	IGC-3CG-046
IGC	SIRT3	1	14.3	11	p15.5	Gain	sirtuin 3	0.355918	IGC-3CG-104
IGC	SMAD2	1	14.3	18	q21.1	Gain|Loss	SMAD family member 2	0.355918	IGC-3CG-104
IGC	SMAD3	1	14.3	15	q22.33	Gain	SMAD family member 3	0.355918	IGC-3CG-104
IGC	SMAD4	1	14.3	18	q21.2	Gain|Loss	SMAD family member 4	0.355918	IGC-3CG-104
IGC	SMAD9	1	14.3	13	q13.3	Gain	SMAD family member 9	0.355918	IGC-3CG-146
IGC	SMURF2	1	14.3	17	q24.1	Loss	SMAD specific E3 ubiquitin protein ligase 2	0.355918	IGC-3CG-046
IGC	SPRR2A	1	14.3	1	q21.3	Loss	small proline rich protein 2A	0.355918	IGC-3CG-104
IGC	SHH	1	14.3	7	q36.3	Gain	sonic hedgehog	0.355918	IGC-3CG-128
IGC	SKP2	1	14.3	5	p13.2	Gain	S-phase kinase associated protein 2	0.355918	IGC-3CG-104
IGC	SPRY2	1	14.3	13	q31.1	Gain	sprouty RTK signaling antagonist 2	0.355918	IGC-3CG-104
IGC	SOX17	1	14.3	8	q11.23	Gain	SRY-box 17	0.355918	IGC-3CG-104
IGC	SOX2	1	14.3	3	q26.33	Gain	SRY-box 2	0.355918	IGC-3CG-104
IGC	SOX3	1	14.3	X	q27.1	Loss	SRY-box 3	0.355918	IGC-3CG-128
IGC	SOX5	1	14.3	12	p12.1	Loss	SRY-box 5	1	IGC-3CG-104
IGC	ST6GAL1	1	14.3	3	q27.3	Gain	ST6 beta-galactoside alpha-26-sialyltransferase 1	0.355918	IGC-3CG-104
IGC	SREBF1	1	14.3	17	p11.2	Gain	sterol regulatory element binding transcription factor 1	0.355918	IGC-3CG-128
IGC	STIM2	1	14.3	4	p15.2	Loss	stromal interaction molecule 2	0.355918	IGC-3CG-104
IGC	SMC3	1	14.3	10	q25.2	Loss	structural maintenance of chromosomes 3	0.355918	IGC-3CG-104
IGC	SOD2	1	14.3	6	q25.3	Gain	superoxide dismutase 2	0.355918	IGC-3CG-104
IGC	SFTPC	1	14.3	8	p21.3	Gain	surfactant protein C	0.355918	IGC-3CG-128
IGC	TBX2	1	14.3	17	q23.2	Gain	T-box 2	0.355918	IGC-3CG-104
IGC	TIAM1	1	14.3	21	q22.11	Loss	T-cell lymphoma invasion and metastasis 1	0.355918	IGC-3CG-046
IGC	TERT	1	14.3	5	p15.33	Gain	telomerase reverse transcriptase	0.355918	IGC-3CG-104
IGC	TNXB	1	14.3	6	p21.32	Gain|Loss	tenascin XB	0.355918	IGC-3CG-104
IGC	TET3	1	14.3	2	p13.1	Gain	tet methylcytosine dioxygenase 3	0.355918	IGC-3CG-104
IGC	TXN	1	14.3	9	q31.3	Loss	thioredoxin	0.355918	IGC-3CG-046
IGC	TXN2	1	14.3	22	q12.3	Loss	thioredoxin 2	0.355918	IGC-3CG-046
IGC	TXNIP	1	14.3	1	q21.1	Gain	thioredoxin interacting protein	0.355918	IGC-3CG-104
IGC	TJP1	1	14.3	15	q13.1	Loss	tight junction protein 1	0.355918	IGC-3CG-104
IGC	TIMELESS	1	14.3	12	q13.3	Gain|Loss	timeless circadian clock	0.355918	IGC-3CG-104
IGC	TIMP1	1	14.3	X	p11.3	Loss	TIMP metallopeptidase inhibitor 1	0.355918	IGC-3CG-128
IGC	TIMP3	1	14.3	22	q12.3	Gain|Loss	TIMP metallopeptidase inhibitor 3	0.355918	IGC-3CG-104
IGC	TRAP1	1	14.3	16	p13.3	Loss	TNF receptor associated protein 1	0.355918	IGC-3CG-046
IGC	TNFSF10	1	14.3	3	q26.31	Gain	TNF superfamily member 10	0.355918	IGC-3CG-104
IGC	TCF3	1	14.3	19	p13.3	Gain	transcription factor 3	0.355918	IGC-3CG-104
IGC	TFCP2	1	14.3	12	q13.13	Loss	transcription factor CP2	0.355918	IGC-3CG-046
IGC	TFDP3	1	14.3	X	q26.2	Loss	transcription factor Dp family member 3	0.355918	IGC-3CG-128
IGC	TLE1	1	14.3	9	q21.32	Gain	transducin like enhancer of split 1	0.355918	IGC-3CG-104
IGC	TLE4	1	14.3	9	q21.31	Loss	transducin like enhancer of split 4	0.355918	IGC-3CG-104
IGC	TACC3	1	14.3	4	p16.3	Gain	transforming acidic coiled-coil containing protein 3	0.355918	IGC-3CG-104
IGC	TGFA	1	14.3	2	p13.3	Gain|Loss	transforming growth factor alpha	0.355918	IGC-3CG-104
IGC	TGFB1	1	14.3	19	q13.2	Gain	transforming growth factor beta 1	0.355918	IGC-3CG-104
IGC	TGFB3	1	14.3	14	q24.3	Gain|Loss	transforming growth factor beta 3	0.355918	IGC-3CG-104
IGC	TGM2	1	14.3	20	q11.23	Gain	transglutaminase 2	0.355918	IGC-3CG-128
IGC	TM4SF5	1	14.3	17	p13.2	Loss	transmembrane 4 L six family member 5	0.355918	IGC-3CG-046
IGC	TRIM11	1	14.3	1	q42.13	Gain	tripartite motif containing 11	0.355918	IGC-3CG-128
IGC	TRIM16	1	14.3	17	p12	Gain	tripartite motif containing 16	0.355918	IGC-3CG-104
IGC	TRIM37	1	14.3	17	q22	Loss	tripartite motif containing 37	0.355918	IGC-3CG-046
IGC	TSC2	1	14.3	16	p13.3	Gain	TSC complex subunit 2	0.355918	IGC-3CG-104
IGC	TUFT1	1	14.3	1	q21.3	Loss	tuftelin 1	0.355918	IGC-3CG-104
IGC	TP53	1	14.3	17	p13.1	Gain	tumor protein p53	0.355918	IGC-3CG-104
IGC	TP53BP1	1	14.3	15	q15.3	Loss	tumor protein p53 binding protein 1	0.355918	IGC-3CG-104
IGC	TP53BP2	1	14.3	1	q41	Gain	tumor protein p53 binding protein 2	0.355918	IGC-3CG-146
IGC	TP53INP1	1	14.3	8	q22.1	Gain	tumor protein p53 inducible nuclear protein 1	0.355918	IGC-3CG-104
IGC	TUSC7	1	14.3	3	q13.31	Loss	tumor suppressor candidate 7 (non-protein coding)	0.355918	IGC-3CG-104
IGC	TWIST1	1	14.3	7	p21.1	Gain	twist family bHLH transcription factor 1	0.355918	IGC-3CG-104
IGC	YWHAG	1	14.3	7	q11.23	Gain	tyrosine 3-monooxygenase/tryptophan 5-monooxygenase activation protein gamma	0.355918	IGC-3CG-104
IGC	UHRF2	1	14.3	9	p24.1	Loss	ubiquitin like with PHD and ring finger domains 2	0.355918	IGC-3CG-046
IGC	UBE3C	1	14.3	7	q36.3	Loss	ubiquitin protein ligase E3C	0.355918	IGC-3CG-104
IGC	VCP	1	14.3	9	p13.3	Gain	valosin containing protein	0.355918	IGC-3CG-104
IGC	VANGL1	1	14.3	1	p13.1	Loss	VANGL planar cell polarity protein 1	0.355918	IGC-3CG-104
IGC	VASH2	1	14.3	1	q32.3	Loss	vasohibin 2	0.355918	IGC-3CG-128
IGC	VGLL4	1	14.3	3	p25.2	Gain|Loss	vestigial like family member 4	0.355918	IGC-3CG-104
IGC	VSNL1	1	14.3	2	p24.2	Gain	visinin like 1	0.355918	IGC-3CG-128
IGC	VHL	1	14.3	3	p25.3	Gain	von Hippel-Lindau tumor suppressor	0.355918	IGC-3CG-104
IGC	VSIG4	1	14.3	X	q12	Loss	V-set and immunoglobulin domain containing 4	0.355918	IGC-3CG-128
IGC	WASF3	1	14.3	13	q12.13	Gain|Loss	WAS protein family member 3	0.355918	IGC-3CG-104
IGC	WT1	1	14.3	11	p13	Gain|Loss	Wilms tumor 1	0.355918	IGC-3CG-104
IGC	WNT3A	1	14.3	1	q42.13	Gain	Wnt family member 3A	0.355918	IGC-3CG-128
IGC	WISP2	1	14.3	20	q13.12	Gain	WNT1 inducible signaling pathway protein 2	0.355918	IGC-3CG-128
IGC	ZEB2-AS1	1	14.3	2	q22.3	Gain	ZEB2 antisense RNA 1	0.355918	IGC-3CG-104
IGC	ZBTB33	1	14.3	X	q24	Loss	zinc finger and BTB domain containing 33	0.355918	IGC-3CG-128
IGC	ZFYVE9	1	14.3	1	p32.3	Loss	zinc finger FYVE-type containing 9	0.355918	IGC-3CG-046
IGC	ZNF143	1	14.3	11	p15.4	Loss	zinc finger protein 143	0.355918	IGC-3CG-046
IGC	ZYX	1	14.3	7	q34	Gain	zyxin	0.355918	IGC-3CG-128
Intestinal gastric cancer (IGC); Copy number alteration (CNA)
The p-value was calculated by a t test between affected IGC versus NAG samples.

## Sheet: EMT-IGC cut off
Table S1. CNA-EMT genes in IGC.
Cancer type	EMT-Gene	Number of patients with alteration	% of occurrence (n= 7)	Chromosome	Gene cytoband	CNA-types	EMT-Gene description	p-value (IGC vs NAG)	ID Patients
IGC	GPC3	7	100	X	q26.2	Gain|Loss	glypican 3	0.355918	IGC-3CG-128|IGC-3CG-008|IGC-3CG-099|IGC-3CG-104|IGC-3CG-126|IGC-3CG-146|IGC-3CG-046
IGC	WWOX	6	85.7	16	q23.1	Gain|Loss	WW domain containing oxidoreductase	0.00410441	IGC-3CG-046|IGC-3CG-104|IGC-3CG-099|IGC-3CG-126|IGC-3CG-146|IGC-3CG-128
IGC	NF1	5	71.4	17	q11.2	Gain|Loss	neurofibromin 1	1	IGC-3CG-104|IGC-3CG-099|IGC-3CG-126|IGC-3CG-146|IGC-3CG-046
IGC	CDH13	4	57.1	16	q23.3	Gain|Loss	cadherin 13	0.111685	IGC-3CG-046|IGC-3CG-104|IGC-3CG-099|IGC-3CG-146
IGC	ETS1	4	57.1	11	q24.3	Gain|Loss	ETS proto-oncogene 1 transcription factor	0.0300198	IGC-3CG-046|IGC-3CG-104|IGC-3CG-126|IGC-3CG-128
IGC	MSI2	4	57.1	17	q22	Gain|Loss	musashi RNA binding protein 2	0.0300198	IGC-3CG-046|IGC-3CG-128|IGC-3CG-104|IGC-3CG-008
IGC	PTK2	4	57.1	8	q24.3	Gain|Loss	protein tyrosine kinase 2	0.0300198	IGC-3CG-104|IGC-3CG-128|IGC-3CG-146|IGC-3CG-046
IGC	TRPS1	4	57.1	8	q23.3	Gain|Loss	transcriptional repressor GATA binding 1	0.0300198	IGC-3CG-046|IGC-3CG-104|IGC-3CG-128|IGC-3CG-146
IGC	ZEB2	4	57.1	2	q22.3	Gain|Loss	zinc finger E-box binding homeobox 2	0.0300198	IGC-3CG-046|IGC-3CG-104|IGC-3CG-128|IGC-3CG-099
IGC	ALK	3	42.9	2	p23.1	Gain|Loss	ALK receptor tyrosine kinase	0.0781407	IGC-3CG-046|IGC-3CG-104|IGC-3CG-146
IGC	AGO2	3	42.9	8	q24.3	Gain|Loss	argonaute 2 RISC catalytic component	0.0781407	IGC-3CG-104|IGC-3CG-146|IGC-3CG-046
IGC	ATXN1	3	42.9	6	p22.3	Gain|Loss	ataxin 1	0.273123	IGC-3CG-104|IGC-3CG-099|IGC-3CG-126
IGC	CDK3	3	42.9	17	q25.1	Gain|Loss	cyclin dependent kinase 3	0.0781407	IGC-3CG-104|IGC-3CG-046|IGC-3CG-128
IGC	CRIM1	3	42.9	2	p22.2	Gain|Loss	cysteine rich transmembrane BMP regulator 1	0.0781407	IGC-3CG-046|IGC-3CG-104|IGC-3CG-128
IGC	DAB2IP	3	42.9	9	q33.2	Gain	DAB2 interacting protein	0.0781407	IGC-3CG-046|IGC-3CG-128|IGC-3CG-104
IGC	EP300	3	42.9	22	q13.2	Gain|Loss	E1A binding protein p300	0.0781407	IGC-3CG-104|IGC-3CG-046|IGC-3CG-128
IGC	EGFR	3	42.9	7	p11.2	Gain|Loss	epidermal growth factor receptor	0.0781407	IGC-3CG-046|IGC-3CG-104|IGC-3CG-128
IGC	EEF1D	3	42.9	8	q24.3	Gain	eukaryotic translation elongation factor 1 delta	0.0781407	IGC-3CG-104|IGC-3CG-128|IGC-3CG-146
IGC	FMR1	3	42.9	X	q27.3	Gain|Loss	fragile X mental retardation 1	1	IGC-3CG-128|IGC-3CG-099|IGC-3CG-104
IGC	GLI2	3	42.9	2	q14.2	Gain|Loss	GLI family zinc finger 2	0.0781407	IGC-3CG-046|IGC-3CG-128|IGC-3CG-104
IGC	GRHL2	3	42.9	8	q22.3	Gain	grainyhead like transcription factor 2	0.611091	IGC-3CG-104|IGC-3CG-128|IGC-3CG-146
IGC	H19	3	42.9	11	p15.5	Gain|Loss	H19 imprinted maternally expressed transcript (non-protein coding)	0.0781407	IGC-3CG-046|IGC-3CG-128|IGC-3CG-104
IGC	HSP90AA1	3	42.9	14	q32.31	Gain|Loss	heat shock protein 90 alpha family class A member 1	0.0781407	IGC-3CG-104|IGC-3CG-046|IGC-3CG-128
IGC	HDAC4	3	42.9	2	q37.3	Gain|Loss	histone deacetylase 4	0.0781407	IGC-3CG-046|IGC-3CG-128|IGC-3CG-104
IGC	HOXA10	3	42.9	7	p15.2	Gain	homeobox A10	0.0781407	IGC-3CG-104|IGC-3CG-126|IGC-3CG-128
IGC	HOXA9	3	42.9	7	p15.2	Gain	homeobox A9	0.0781407	IGC-3CG-104|IGC-3CG-126|IGC-3CG-128
IGC	HIP1	3	42.9	7	q11.23	Gain|Loss	huntingtin interacting protein 1	0.0781407	IGC-3CG-104|IGC-3CG-046|IGC-3CG-128
IGC	KLF5	3	42.9	13	q22.1	Gain|Loss	Kruppel like factor 5	0.0781407	IGC-3CG-104|IGC-3CG-146|IGC-3CG-046
IGC	KLF6	3	42.9	10	p15.2	Gain	Kruppel like factor 6	0.0781407	IGC-3CG-046|IGC-3CG-104|IGC-3CG-128
IGC	KLF8	3	42.9	X	p11.21	Gain|Loss	Kruppel like factor 8	0.0781407	IGC-3CG-104|IGC-3CG-046|IGC-3CG-128
IGC	LYN	3	42.9	8	q12.1	Gain|Loss	LYN proto-oncogene Src family tyrosine kinase	0.0781407	IGC-3CG-104|IGC-3CG-146|IGC-3CG-046
IGC	MITF	3	42.9	3	p13	Gain|Loss	melanogenesis associated transcription factor	0.0781407	IGC-3CG-046|IGC-3CG-128|IGC-3CG-104
IGC	MIR196B	3	42.9	7	p15.2	Gain	microRNA 196b	0.0781407	IGC-3CG-104|IGC-3CG-126|IGC-3CG-128
IGC	MIR675	3	42.9	11	p15.5	Gain	microRNA 675	0.0781407	IGC-3CG-046|IGC-3CG-128|IGC-3CG-104
IGC	MICAL2	3	42.9	11	p15.3	Gain	microtubule associated monooxygenase calponin and LIM domain containing 2	0.0781407	IGC-3CG-046|IGC-3CG-128|IGC-3CG-104
IGC	MTUS1	3	42.9	8	p22	Gain|Loss	microtubule associated scaffold protein 1	0.0781407	IGC-3CG-128|IGC-3CG-146|IGC-3CG-104
IGC	MSN	3	42.9	X	q12	Gain|Loss	moesin	0.0781407	IGC-3CG-128|IGC-3CG-104|IGC-3CG-126
IGC	MYC	3	42.9	8	q24.21	Gain	MYC proto-oncogene bHLH transcription factor	0.0781407	IGC-3CG-104|IGC-3CG-128|IGC-3CG-146
IGC	NRP2	3	42.9	2	q33.3	Gain|Loss	neuropilin 2	0.0781407	IGC-3CG-046|IGC-3CG-104|IGC-3CG-128
IGC	NTRK2	3	42.9	9	q21.33	Gain	neurotrophic receptor tyrosine kinase 2	0.0781407	IGC-3CG-046|IGC-3CG-128|IGC-3CG-104
IGC	NTRK3	3	42.9	15	q25.3	Gain|Loss	neurotrophic receptor tyrosine kinase 3	0.0781407	IGC-3CG-046|IGC-3CG-099|IGC-3CG-104
IGC	NDRG1	3	42.9	8	q24.22	Gain	N-myc downstream regulated 1	0.0781407	IGC-3CG-104|IGC-3CG-128|IGC-3CG-146
IGC	NOTCH2	3	42.9	1	p12	Gain	notch 2	0.0781407	IGC-3CG-104|IGC-3CG-046|IGC-3CG-128
IGC	NCOA3	3	42.9	20	q13.12	Gain|Loss	nuclear receptor coactivator 3	0.0781407	IGC-3CG-104|IGC-3CG-046|IGC-3CG-128
IGC	NR5A2	3	42.9	1	q32.1	Gain|Loss	nuclear receptor subfamily 5 group A member 2	0.0781407	IGC-3CG-104|IGC-3CG-046|IGC-3CG-128
IGC	NUMB	3	42.9	14	q24.3	Gain|Loss	NUMB endocytic adaptor protein	0.0781407	IGC-3CG-046|IGC-3CG-128|IGC-3CG-104
IGC	OCLN	3	42.9	5	q13.2	Gain|Loss	occludin	0.0781407	IGC-3CG-046|IGC-3CG-104|IGC-3CG-128
IGC	PARD3	3	42.9	10	p11.21	Gain|Loss	par-3 family cell polarity regulator	0.611091	IGC-3CG-104|IGC-3CG-046|IGC-3CG-128
IGC	PIK3CA	3	42.9	3	q26.32	Gain	phosphatidylinositol-45-bisphosphate 3-kinase catalytic subunit alpha	0.273123	IGC-3CG-099|IGC-3CG-126|IGC-3CG-146
IGC	PIK3R1	3	42.9	5	q13.1	Gain	phosphoinositide-3-kinase regulatory subunit 1	0.0781407	IGC-3CG-046|IGC-3CG-128|IGC-3CG-126
IGC	PAG1	3	42.9	8	q21.13	Gain	phosphoprotein membrane anchor with glycosphingolipid microdomains 1	0.0781407	IGC-3CG-104|IGC-3CG-128|IGC-3CG-146
IGC	PTPN11	3	42.9	12	q24.13	Gain|Loss	protein tyrosine phosphatase non-receptor type 11	0.0781407	IGC-3CG-104|IGC-3CG-046|IGC-3CG-128
IGC	PTP4A3	3	42.9	8	q24.3	Gain	protein tyrosine phosphatase type IVA member 3	0.0781407	IGC-3CG-046|IGC-3CG-104|IGC-3CG-128
IGC	PCDH9	3	42.9	13	q21.32	Gain|Loss	protocadherin 9	0.611091	IGC-3CG-099|IGC-3CG-104|IGC-3CG-146
IGC	ROR1	3	42.9	1	p31.3	Gain|Loss	receptor tyrosine kinase like orphan receptor 1	0.0781407	IGC-3CG-046|IGC-3CG-128|IGC-3CG-104
IGC	SATB2	3	42.9	2	q33.1	Gain|Loss	SATB homeobox 2	0.0781407	IGC-3CG-046|IGC-3CG-128|IGC-3CG-104
IGC	SCRIB	3	42.9	8	q24.3	Gain	scribbled planar cell polarity protein	0.0781407	IGC-3CG-104|IGC-3CG-128|IGC-3CG-146
IGC	SNW1	3	42.9	14	q24.3	Gain|Loss	SNW domain containing 1	0.0781407	IGC-3CG-104|IGC-3CG-046|IGC-3CG-128
IGC	SPOCK1	3	42.9	5	q31.2	Gain|Loss	SPARC/osteonectin cwcv and kazal like domains proteoglycan 1	0.0781407	IGC-3CG-046|IGC-3CG-128|IGC-3CG-104
IGC	TEAD1	3	42.9	11	p15.3	Gain	TEA domain transcription factor 1	0.0781407	IGC-3CG-104|IGC-3CG-046|IGC-3CG-128
IGC	TET1	3	42.9	10	q21.3	Gain|Loss	tet methylcytosine dioxygenase 1	0.0781407	IGC-3CG-104|IGC-3CG-046|IGC-3CG-128
IGC	TCF4	3	42.9	18	q21.2	Gain|Loss	transcription factor 4	0.0781407	IGC-3CG-046|IGC-3CG-104|IGC-3CG-128
IGC	TSC1	3	42.9	9	q34.13	Gain|Loss	TSC complex subunit 1	0.273123	IGC-3CG-104|IGC-3CG-099|IGC-3CG-126
IGC	TP63	3	42.9	3	q28	Gain|Loss	tumor protein p63	1	IGC-3CG-104|IGC-3CG-099|IGC-3CG-146
IGC	USP9X	3	42.9	X	p11.4	Gain|Loss	ubiquitin specific peptidase 9 X-linked	0.0781407	IGC-3CG-128|IGC-3CG-104|IGC-3CG-046
IGC	VEGFA	3	42.9	6	p21.1	Gain	vascular endothelial growth factor A	0.0781407	IGC-3CG-046|IGC-3CG-104|IGC-3CG-128
Intestinal gastric cancer (IGC); Copy number alteration (CNA)
The p-value was calculated by a t test between affected IGC versus NAG samples.

## Sheet: EMT-NAG
Table S1. CNA-EMT genes in NAG.
Cancer type	EMT-Gene	Number of patients with alteration	% of occurrence (n= 7)	Chromosome	Gene cytoband	CNA-types	EMT-Gene description	p-value (NAG vs DGC)	p-value (NAG vs IGC)	ID Patients
NAG	GPC3	6	85.7	X	q26.2	Gain	glypican 3	0.355918	0.355918	NAG-4GB-001|NAG-4GB-025|NAG-4GB-036|NAG-4GB-015|NAG-4GB-033|NAG-4GB-042
NAG	NF1	5	71.4	17	q11.2	Gain	neurofibromin 1	0.00823735	1	NAG-4GB-015|NAG-4GB-025|NAG-4GB-033|NAG-4GB-036|NAG-4GB-042
NAG	FMR1	3	42.9	X	q27.3	Gain	fragile X mental retardation 1	0.0781407	1	NAG-4GB-025|NAG-4GB-015|NAG-4GB-033
NAG	LEF1	3	42.9	4	q25	Gain	lymphoid enhancer binding factor 1	0.0781407	0.611091	NAG-4GB-015|NAG-4GB-033|NAG-4GB-042
NAG	TP63	3	42.9	3	q28	Loss	tumor protein p63	0.0781407	1	NAG-4GB-015|NAG-4GB-025|NAG-4GB-033
NAG	AR	2	28.6	X	q12	Gain	androgen receptor	0.317021	1	NAG-4GB-001|NAG-4GB-036
NAG	FHL1	2	28.6	X	q26.3	Gain|Loss	four and a half LIM domains 1	0.172308	1	NAG-4GB-001|NAG-4GB-025
NAG	GOLPH3	2	28.6	5	p13.3	Gain	golgi phosphoprotein 3	0.172308	1	NAG-4GB-015|NAG-4GB-025
NAG	GRHL2	2	28.6	8	q22.3	Loss	grainyhead like transcription factor 2	0.172308	0.611091	NAG-4GB-001|NAG-4GB-036
NAG	PARD3	2	28.6	10	p11.21	Loss	par-3 family cell polarity regulator	0.172308	0.611091	NAG-4GB-025|NAG-4GB-033
NAG	PCDH9	2	28.6	13	q21.32	Gain	protocadherin 9	0.172308	0.611091	NAG-4GB-025|NAG-4GB-042
NAG	ATXN1	1	14.3	6	p22.3	Gain	ataxin 1	0.355918	0.273123	NAG-4GB-036
NAG	CAV1	1	14.3	7	q31.2	Loss	caveolin 1	0.355918	1	NAG-4GB-025
NAG	CDH11	1	14.3	16	q21	Gain	cadherin 11	0.355918	1	NAG-4GB-036
NAG	CDH13	1	14.3	16	q23.3	Loss	cadherin 13	0.355918	0.111685	NAG-4GB-031
NAG	FBLN1	1	14.3	22	q13.31	Loss	fibulin 1	0.355918	1	NAG-4GB-033
NAG	HS3ST3B1	1	14.3	17	p12	Loss	heparan sulfate-glucosamine 3-sulfotransferase 3B1	0.355918	1	NAG-4GB-031
NAG	NOX1	1	14.3	X	q22.1	Gain	NADPH oxidase 1	0.355918	1	NAG-4GB-015
NAG	PIK3CA	1	14.3	3	q26.32	Gain	phosphatidylinositol-45-bisphosphate 3-kinase catalytic subunit alpha	0.355918	0.273123	NAG-4GB-015
NAG	PLS3	1	14.3	X	q23	Gain	plastin 3	0.355918	0.552421	NAG-4GB-036
NAG	RAC1	1	14.3	7	p22.1	Gain	ras-related C3 botulinum toxin substrate 1 (rho family small GTP binding protein Rac1)	0.355918	0.552421	NAG-4GB-033
NAG	RMST	1	14.3	12	q23.1	Loss	rhabdomyosarcoma 2 associated transcript (non-protein coding)	0.355918	0.552421	NAG-4GB-015
NAG	ROCK1	1	14.3	18	q11.1	Gain	Rho associated coiled-coil containing protein kinase 1	0.355918	0.552421	NAG-4GB-015
NAG	SOX5	1	14.3	12	p12.1	Loss	SRY-box 5	0.355918	1	NAG-4GB-036
NAG	TRPM8	1	14.3	2	q37.1	Loss	transient receptor potential cation channel subfamily M member 8	0.355918	0.355918	NAG-4GB-015
NAG	TSC1	1	14.3	9	q34.13	Loss	TSC complex subunit 1	0.355918	0.273123	NAG-4GB-015
NAG	UBR5	1	14.3	8	q22.3	Loss	ubiquitin protein ligase E3 component n-recognin 5	0.355918	0.552421	NAG-4GB-033
NAG	WWOX	1	14.3	16	q23.1	Gain	WW domain containing oxidoreductase	0.355918	0.00410441	NAG-4GB-031
Non atrophic gastritis (NAG); Copy number alteration (CNA)
The p-values were calculated by a t test between affected NAG versus DGC and NAG versus IGC

## Sheet: EMT-NAG cut off
Table S1. CNA-EMT genes in NAG.
Cancer type	EMT-Gene	Number of patients with alteration	% of occurrence (n= 7)	Chromosome	Gene cytoband	CNA-types	EMT-Gene description	p-value (NAG vs DGC)	p-value (NAG vs IGC)	ID Patients
NAG	GPC3	6	85.7	X	q26.2	Gain	glypican 3	0.355918	0.355918	NAG-4GB-001|NAG-4GB-025|NAG-4GB-036|NAG-4GB-015|NAG-4GB-033|NAG-4GB-042
NAG	NF1	5	71.4	17	q11.2	Gain	neurofibromin 1	0.00823735	1	NAG-4GB-015|NAG-4GB-025|NAG-4GB-033|NAG-4GB-036|NAG-4GB-042
NAG	FMR1	3	42.9	X	q27.3	Gain	fragile X mental retardation 1	0.0781407	1	NAG-4GB-025|NAG-4GB-015|NAG-4GB-033
NAG	LEF1	3	42.9	4	q25	Gain	lymphoid enhancer binding factor 1	0.0781407	0.611091	NAG-4GB-015|NAG-4GB-033|NAG-4GB-042
NAG	TP63	3	42.9	3	q28	Loss	tumor protein p63	0.0781407	1	NAG-4GB-015|NAG-4GB-025|NAG-4GB-033
Non atrophic gastritis (NAG); Copy number alteration (CNA)
The p-values were calculated by a t test between affected NAG versus DGC and NAG versus IGC

## Sheet: Readme
Header	Description
Cancer type	Diffuse Gastric Cancer (DGC), Intestinal Gastric Cancer (IGC), Non Atrophic Gastritis (NAG)
EMT-Gene	Genes reported in the EMT database 2.0. http://dbemt.bioinfo-minzhao.org/
Number of patients with alteration	Number of patients where the gene was found affected by a CNA in the corresponding tissue
% of occurrence (n= 7)	Percentage of prevalence of the affected gene in patients corresponding to the tissue, (frequency * 100 / Total patients of tissue-type)
Chromosome	Chromosome where the affected gene is located
Gene cytoband	Cytoband where the affected gene is located
CNA-types	Type of CNA, loss or gain
EMT-Gene description	Brief description of gene reported in the EMT database 2.0.
p-value	Probability value calculated from a t-test
ID Patients	Identifier of the patient with a gene affected by a CNA
